# Supplementary material for: Ag(i)-Mediated hydrogen isotope exchange of mono-fluorinated (hetero)arenes
Source: Royal Society of Chemistry journal article supplement (doi:10.1039/d0ob01273d), 2020-01-01

## Ag(I)-Mediated Hydrogen Isotope Exchange of Mono-Fluorinated (Hetero)arenes

Guang-Qi Hu, En-Ci Li, Hong-Hai Zhang\* and Wei Huang

Key Laboratory of Flexible Electronics (KLOFE) & Institute of Advanced Materials (IAM), Jiangsu National Synergistic Innovation Center for Advanced Materials (SICAM), Nanjing Tech University (Nanjing Tech), 30 Puzhu Road, Nanjing 211816, P.R. China

[iamhhzhang@njtech.edu.cn](mailto:iamhhzhang@njtech.edu.cn)

### Supporting Information

**General:** General: NMR spectra were recorded at 23 °C on a Varian VNMRs 300 MHz NMR spectrometer in CDCl<sub>3</sub> unless otherwise noted. Chemical shifts were determined relative to residual CHCl<sub>3</sub> (7.26 ppm) for proton, and to the CDCl<sub>3</sub> “triplet” at 77.23 ppm for carbon. GC-MS experiments were carried out using an Agilent GC/MS instrument consisting of a 6890N series GC and a 5973 Mass Selective Detector System. All yields reported refer to isolated yields unless otherwise indicated. All the reagents and solvents were purchased from commercial sources and used as received. The atom% deuterium incorporation was determined by both of GC-MS and <sup>1</sup>H NMR spectrum. Since the relative intensity was found to depend on the pulse delay, the pulse delay was adjusted to 120s to ensure complete relaxation occurred. The method to determine atom% deuterium incorporation using GC-MS is shown below.

The incorporation of deuterium into each substrate was verified by GC-MS, observing a shift in the isotope distribution in the starting material (M) to show M+1 (*d*<sub>1</sub>), M+2 (*d*<sub>2</sub>), etc. Data processing was performed using the following formula:

Using compound **2h** as example: isotope distribution (GC-MS): 2% *d*<sub>0</sub>, 20% *d*<sub>1</sub>, 78% *d*<sub>2</sub>.

Atom% deuterium incorporation = [(%*d*<sub>1</sub> × 1) + (%*d*<sub>2</sub> × 2)] / 2

Atom% deuterium incorporation = [(20% × 1) + (78% × 2)] / 2 = 88%

**Table S1: Optimization of Solvent:**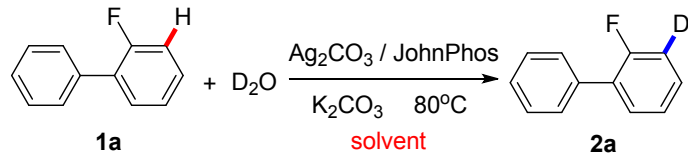

| Entry <sup>a</sup> | solvent               | D incorporation <sup>b</sup> |
|--------------------|-----------------------|------------------------------|
| 1                  | DMSO (0.3 M)          | 5%                           |
| 2                  | Toluene (0.3 M)       | 15%                          |
| 3                  | DCM (0.3 M)           | 1%                           |
| 4                  | DMF (0.3 M)           | 3%                           |
| 5                  | Ethyl Acetate (0.3 M) | 0%                           |
| 6                  | DMA (0.3 M)           | 12%                          |
| 7                  | 1,4-dioxane (0.3 M)   | 2%                           |
| 8                  | Toluene (1 M)         | 43%                          |

<sup>a</sup>The reaction was conducted on 0.2 mmol of **1a**, 4 mmol of D<sub>2</sub>O, 0.1 mmol of Ag<sub>2</sub>CO<sub>3</sub>, 0.1 mmol of JohnPhos, 0.2 mmol of K<sub>2</sub>CO<sub>3</sub> in DMSO at 80°C. <sup>b</sup>Determined by GC-MS

**Table S2: Optimization of the Additives:**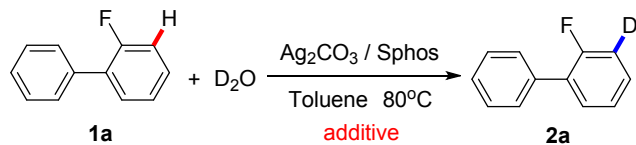

| Entry <sup>a</sup> | additive                                          | D incorporation <sup>b</sup> |
|--------------------|---------------------------------------------------|------------------------------|
| 1                  | K <sub>2</sub> CO <sub>3</sub>                    | 91%                          |
| 2                  | Na <sub>2</sub> CO <sub>3</sub>                   | 39%                          |
| 3                  | Cs <sub>2</sub> CO <sub>3</sub>                   | 40%                          |
| 4                  | Li <sub>2</sub> CO <sub>3</sub>                   | 80%                          |
| 5                  | CdCO <sub>3</sub>                                 | 73%                          |
| 6                  | MnCO <sub>3</sub>                                 | 60%                          |
| 7                  | SrCO <sub>3</sub>                                 | 83%                          |
| 8                  | KHCO <sub>3</sub>                                 | 55%                          |
| 9                  | BaCO <sub>3</sub>                                 | 85%                          |
| 10                 | Cu <sub>2</sub> (OH) <sub>2</sub> CO <sub>3</sub> | 78%                          |

<sup>a</sup>The reaction was conducted on 0.2 mmol of **1a**, 2 mmol of D<sub>2</sub>O, 0.1 mmol of Ag<sub>2</sub>CO<sub>3</sub>, 0.1 mmol of Sphos, 0.2 mmol of additive in 0.2 mL toluene at 80°C. <sup>b</sup>Determined by GC-MS

**Table S3: Screening the ratio of Ag<sub>2</sub>CO<sub>3</sub> and Sphos:**

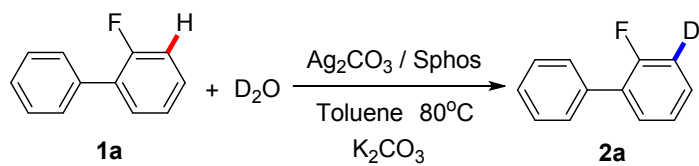

| Entry <sup>a</sup> | Ag <sub>2</sub> CO <sub>3</sub> (%) | Sphos (%) | D incorporation <sup>b</sup> |
|--------------------|-------------------------------------|-----------|------------------------------|
| 1                  | 50                                  | 50        | 91%                          |
| 2                  | 50                                  | 40        | 80%                          |
| 3                  | 50                                  | 30        | 76%                          |
| 4                  | 50                                  | 20        | 70%                          |
| 5                  | 50                                  | 10        | 53%                          |
| 6                  | 40                                  | 50        | 50%                          |
| 7                  | 30                                  | 50        | 48%                          |
| 8                  | 20                                  | 50        | 46%                          |
| 9                  | 10                                  | 50        | 36%                          |

<sup>a</sup>The reaction was conducted on 0.2 mmol of **1a**, 2 mmol of D<sub>2</sub>O, Ag<sub>2</sub>CO<sub>3</sub>, Sphos, 0.2 mmol of K<sub>2</sub>CO<sub>3</sub> in 0.2 mL Toluene at 80°C.

<sup>b</sup>Determined by GC-MS

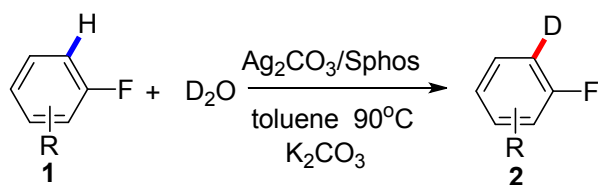

**General Procedure for Ag<sub>2</sub>CO<sub>3</sub> Catalyzed H/D Exchange with 2-fluorobiphenyl (1a) as example:** 2-fluorobiphenyl (172 mg, 1 mmol) was added to a vigorously stirred solution of silver carbonate (138 mg, 0.5 mmol), sphos (205 mg, 0.5 mmol), potassium carbonate (138 mg, 1 mmol) and D<sub>2</sub>O (200 mg, 10 mmol) in toluene (1 mL) in the air. The reaction mixture was stirred at 90°C for 12 h. Then the reaction was quenched with saturated NH<sub>4</sub>Cl solution. The product was extracted with dichloromethane (3 x 20 mL). The combined organic layer was washed with brine and dried over Na<sub>2</sub>SO<sub>4</sub>. After removal of solvents under vacuum, the crude product was purified via column chromatography.

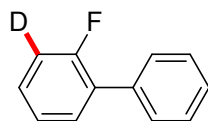

**2a:** Isolated yield: 85%, yellow oil.

<sup>1</sup>H NMR (300 MHz, CDCl<sub>3</sub>): δ 7.64 (d, *J* = 7.8 Hz, 2 H), 7.53 (t, *J* = 7.2 Hz, 3 H), 7.47 ~ 7.37 (m, 2 H), 7.31 ~ 7.28 (m, 1 H), 7.22 (t, *J* = 9.0 Hz, **labeled, 0.10 H**).

<sup>19</sup>F NMR (300 MHz, CDCl<sub>3</sub>): -117.8 (s, 0.14 F), -118.2 (s, 0.86 F).

<sup>13</sup>C NMR (125 MHz, CDCl<sub>3</sub>): 160.97, 159.00, 136.05, 130.98, 130.95, 129.26, 129.24, 129.08, 129.01, 128.63, 127.85, 124.53, 124.51, 116.38, 116.19.

HRMS (ESI) *m/z*: calcd for C<sub>12</sub>H<sub>8</sub>DF<sup>+</sup> ([M]<sup>+</sup>) 173.051; Found 173.0760.

The level of deuterium incorporation was estimated: 90% from <sup>1</sup>H NMR; 96% from GC-MS

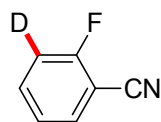

**2b:** Isolated yield: 40% (volatile liquid), yellow oil.

<sup>1</sup>H NMR (300 MHz, CDCl<sub>3</sub>): δ 7.63 ~ 7.56 (m, 2 H), 7.25 ~ 7.21 (m, 1 H), 7.18 (t, *J* = 9.0 Hz, **0.11 H**).

<sup>19</sup>F NMR (300 MHz, CDCl<sub>3</sub>): -106.0 (s, 0.13 F), -106.3 (s, 0.87 F).

<sup>13</sup>C NMR (125 MHz, CDCl<sub>3</sub>): 164.41, 162.35, 135.16, 133.79, 125.00, 124.89, 116.80, 116.65, 114.10, 77.42.

HRMS (ESI) *m/z*: calcd for C<sub>7</sub>H<sub>3</sub>DNF<sup>+</sup> ([M]<sup>+</sup>) 122.0391; Found 122.0386.

The level of deuterium incorporation was estimated: 89% from <sup>1</sup>H NMR; 95% from GC-MS

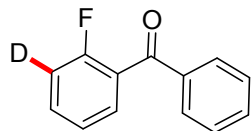

**2c:** Isolated yield: 95%, yellow oil.

$^1\text{H NMR}$  (300 MHz,  $\text{CDCl}_3$ ):  $\delta$  7.83 (d,  $J = 8.1$  Hz, 2 H), 7.61 ~ 7.44 (m, 5 H), 7.25 (t,  $J = 7.8$  Hz, 1 H), 7.15 (t,  $J = 9.0$  Hz, **0.11 H**).

$^{19}\text{F NMR}$  (300 MHz,  $\text{CDCl}_3$ ): -110.9 (s, 0.13 F), -111.2 (s, 0.87 F).

$^{13}\text{C NMR}$  (125 MHz,  $\text{CDCl}_3$ ): 193.55, 161.23, 159.23, 137.59, 133.54, 133.22, 133.15, 133.12, 133.06, 130.87, 130.85, 129.94, 128.61, 127.30, 127.18, 124.44, 116.50, 116.32.

HRMS (ESI)  $m/z$ : calcd for  $\text{C}_{13}\text{H}_8\text{DOF}^+$  ( $[\text{M}]^+$ ) 201.0700; Found 201.0706.

The level of deuterium incorporation was estimated: 89% from  $^1\text{H NMR}$ ; 95% from GC-MS

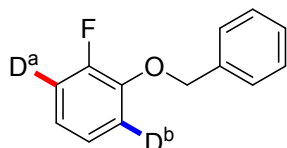

**2d:** Isolated yield: 90%, yellow oil.

$^1\text{H NMR}$  (300 MHz,  $\text{CDCl}_3$ ):  $\delta$  7.46 (d,  $J = 4.2$  Hz, 2 H), 7.40 (t,  $J = 4.5$  Hz, 2 H), 7.34 (t,  $J = 4.2$  Hz, 1 H), 7.13 ~ 7.09 (m, **0.26 H**), 7.04 ~ 7.00 (m, **1.72 H**), 6.94 ~ 6.90 (m, 1 H).

$^{19}\text{F NMR}$  (300 MHz,  $\text{CDCl}_3$ ): -133.8 (s, 0.24 F), -133.9 (s, 0.05 F), -134.1 (s, 0.51 F), -134.2 (s, 0.20 F).

$^{13}\text{C NMR}$  (125 MHz,  $\text{CDCl}_3$ ): 154.71, 151.45, 146.88, 146.74, 136.68, 128.61, 128.09, 127.45, 124.28, 121.60, 121.50, 121.41, 116.46, 116.22, 115.98, 71.47.

HRMS (ESI)  $m/z$ : calcd for  $\text{C}_{13}\text{H}_9\text{D}_2\text{OF}^+$  ( $[\text{M}]^+$ ) 204.0919; Found 204.0924.

The level of deuterium incorporation was estimated: 74% ( $\text{D}^a$ ) and 28% ( $\text{D}^b$ ) from  $^1\text{H NMR}$ ; 57% (average) from GC-MS

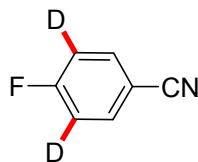

**2e:** Isolated yield: 40% (volatile liquid), yellow oil.

$^1\text{H NMR}$  (300 MHz,  $\text{CDCl}_3$ ):  $\delta$  7.68 (d,  $J = 4.8$  Hz, 2 H), 7.17 (t,  $J = 8.7$  Hz, **0.13 H**).

$^{19}\text{F NMR}$  (300 MHz,  $\text{CDCl}_3$ ): -102.5 (s, 0.09 F), -102.8 (s, 0.91 F).

$^{13}\text{C NMR}$  (125 MHz,  $\text{CDCl}_3$ ): 166.22, 164.18, 134.80, 134.73, 118.19, 117.11, 116.93, 116.73, 116.53, 108.80, 108.70, 77.43.

HRMS (ESI)  $m/z$ : calcd for  $\text{C}_7\text{H}_2\text{D}_2\text{NF}^+$  ( $[\text{M}]^+$ ) 123.0453; Found 123.0446.

The level of deuterium incorporation was estimated: 93% from  $^1\text{H NMR}$ ; 90% from GC-MS

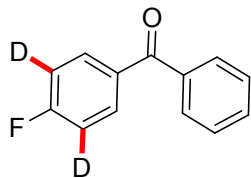

**2f:** Isolated yield: 92%, yellow oil.

$^1\text{H}$  NMR (300 MHz,  $\text{CDCl}_3$ ):  $\delta$  7.84 (d,  $J$  = 3.3 Hz, 2 H), 7.77 (d,  $J$  = 4.5 Hz, 2 H), 7.59 (t,  $J$  = 4.2 Hz, 1 H), 7.48 (t,  $J$  = 4.5 Hz, 2 H), 7.15 (t,  $J$  = 5.1 Hz, **0.09 H**).

$^{19}\text{F}$  NMR (300 MHz,  $\text{CDCl}_3$ ): -106.1 (s, 0.10 F), -106.3 (s, 0.90 F),

$^{13}\text{C}$  NMR (125 MHz,  $\text{CDCl}_3$ ): 195.34, 167.21, 163.84, 137.74, 132.76, 132.64, 132.80, 130.02, 128.52, 115.76, 115.47, 115.22.

HRMS (ESI)  $m/z$ : calcd for  $\text{C}_{13}\text{H}_7\text{D}_2\text{OF}^+$  ( $[\text{M}]^+$ ) 202.0763; Found 202.0771.

The level of deuterium incorporation was estimated: 95% from  $^1\text{H}$  NMR; 97% from GC-MS

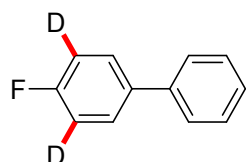

**2g:** Isolated yield: 92%, yellow oil.

$^1\text{H}$  NMR (300 MHz,  $\text{CDCl}_3$ ):  $\delta$  7.62 ~ 7.54 (m, 4 H), 7.45 (t,  $J$  = 7.2 Hz, 2 H), 7.38 ~ 7.33 (m, 1 H), 7.14 (t,  $J$  = 8.7 Hz, **0.29 H**).

$^{19}\text{F}$  NMR (300 MHz,  $\text{CDCl}_3$ ): -115.7 (s, 0.03 F), -116.0 (s, 0.27 F), -116.3 (s, 0.69 F).

$^{13}\text{C}$  NMR (125 MHz,  $\text{CDCl}_3$ ): 140.52, 129.04, 128.97, 128.85, 128.74, 127.48, 127.39, 127.25, 115.97, 115.69.

HRMS (ESI)  $m/z$ : calcd for  $\text{C}_{12}\text{H}_7\text{D}_2\text{F}^+$  ( $[\text{M}]^+$ ) 174.0814; Found 174.0807.

The level of deuterium incorporation was estimated: 85% from  $^1\text{H}$  NMR; 83% from GC-MS

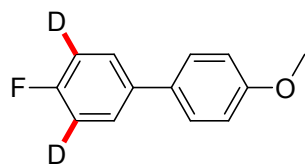

**2h:** Isolated yield: 87%, yellow oil.

$^1\text{H}$  NMR (300 MHz,  $\text{CDCl}_3$ ):  $\delta$  7.51 ~ 7.46 (m, 4 H), 7.11 (t,  $J$  = 8.7 Hz, **0.41 H**), 6.98 (d,  $J$  = 8.7 Hz, 2 H).

$^{19}\text{F}$  NMR (300 MHz,  $\text{CDCl}_3$ ): -116.6 (s, 0.04 F), -116.9 (s, 0.32 F), -117.1 (s, 0.64 F).

$^{13}\text{C}$  NMR (125 MHz,  $\text{CDCl}_3$ ): 163.93, 159.40, 133.10, 128.47, 128.37, 128.25, 128.16, 115.88, 115.60, 114.51, 55.52.

HRMS (ESI)  $m/z$ : calcd for  $\text{C}_{13}\text{H}_9\text{D}_2\text{OF}^+$  ( $[\text{M}]^+$ ) 204.0919; Found 204.0930.

The level of deuterium incorporation was estimated: 80% from  $^1\text{H}$  NMR; 88% from GC-MS.

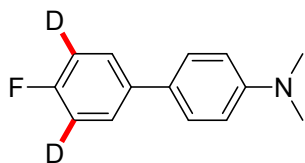

**2i:** Isolated yield: 93%, yellow oil.

$^1\text{H}$  NMR (300 MHz,  $\text{CDCl}_3$ ):  $\delta$  7.51 (d,  $J = 4.9$  Hz, 2 H), 7.46 (d,  $J = 6.6$  Hz, 2 H), 7.10 (t,  $J = 6.6$  Hz, **0.54 H**), 6.81 (d,  $J = 6.6$  Hz, 2 H), 2.99 (s, 6 H).

$^{19}\text{F}$  NMR (300 MHz,  $\text{CDCl}_3$ ): -117.6 (s, 0.09 F), -117.9 (s, 0.37 F), -118.1 (s, 0.54 F).

$^{13}\text{C}$  NMR (125 MHz,  $\text{CDCl}_3$ ): 163.04, 160.63, 150.04, 137.47, 128.42, 127.84, 127.77, 127.73, 127.69, 127.65, 115.64, 115.43, 112.92, 40.34.

HRMS (ESI)  $m/z$ : calcd for  $\text{C}_{14}\text{H}_{12}\text{D}_2\text{NF}^+$  ( $[\text{M}]^+$ ) 217.1236; Found 217.1243.

Deuterium incorporation expected at  $\delta$  7.08.

The level of deuterium incorporation was estimated: 73% from  $^1\text{H}$  NMR; 72% from GC-MS.

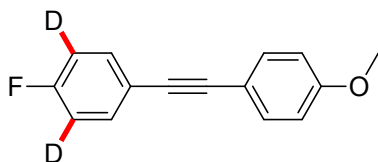

**2j:** Isolated yield: 95%, yellow oil.

$^1\text{H}$  NMR (300 MHz,  $\text{CDCl}_3$ ):  $\delta$  7.50 ~ 7.45 (m, 4 H), 7.03 (t,  $J = 8.7$  Hz, **0.23 H**), 6.88 (d,  $J = 8.7$  Hz, 2 H), 3.83 (s, 3 H).

$^{19}\text{F}$  NMR (300 MHz,  $\text{CDCl}_3$ ): -111.3 (s, 0.01 F), -111.6 (s, 0.18 F), -111.9 (s, 0.80 F).

$^{13}\text{C}$  NMR (125 MHz,  $\text{CDCl}_3$ ): 163.94, 160.65, 159.72, 133.33, 133.23, 133.12, 133.01, 132.91, 115.72, 115.42, 115.24, 114.06, 89.05, 86.99, 55.29.

HRMS (ESI)  $m/z$ : calcd for  $\text{C}_{15}\text{H}_9\text{D}_2\text{OF}^+$  ( $[\text{M}]^+$ ) 228.0919; Found 228.0936.

The level of deuterium incorporation was estimated: 89% from  $^1\text{H}$  NMR; 85% from GC-MS.

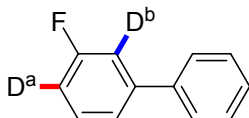

**2k:** Isolated yield: 90%, yellow oil.

$^1\text{H}$  NMR (300 MHz,  $\text{CDCl}_3$ ):  $\delta$  7.64 ~ 7.60 (m, 2 H), 7.48 (t,  $J = 4.2$  Hz, 2 H), 7.44 ~ 7.39 (m, 3 H), 7.33 (d,  $J = 6.0$  Hz, **0.62 H**), 7.07 (t,  $J = 6.0$  Hz, **0.14 H**).

$^{19}\text{F}$  NMR (300 MHz,  $\text{CDCl}_3$ ): -112.9 (s, 0.12 F), -113.2 (s, 0.62 F), -113.5 (s, 0.26 F).

$^{13}\text{C}$  NMR (125 MHz,  $\text{CDCl}_3$ ): 164.87, 161.62, 143.63, 140.00, 130.17, 130.06, 128.91, 127.87, 127.13, 122.76, 114.20, 113.91.

HRMS (ESI)  $m/z$ : calcd for  $\text{C}_{12}\text{H}_{18}\text{D}_2\text{F}^+$  ( $[\text{M}]^+$ ) 173.0751; Found 173.0740.

The level of deuterium incorporation was estimated: 86% ( $\text{D}^a$ ) and 38% ( $\text{D}^b$ ) from  $^1\text{H}$  NMR; 65% (average) from GC-MS.

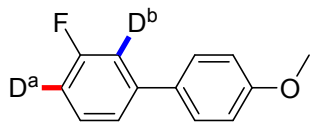

**2l:** Isolated yield: 80%, yellow oil.

$^1\text{H}$  NMR (300 MHz,  $\text{DMSO-}d_6$ ):  $\delta$  7.65 (d,  $J = 5.1$  Hz, 2 H), 7.46 (s, 2 H), 7.44 (s, **0.75 H**), 7.11 (d,  $J = 4.2$  Hz, **0.28 H**), 7.03 (d,  $J = 5.1$  Hz, 2 H), 3.81 (s, 3 H).

$^{19}\text{F}$  NMR (300 MHz,  $\text{DMSO-}d_6$ ): -112.8 (s, 0.29 F), -113.1 (s, 0.57 F), -113.4 (s, 0.14 F).

$^{13}\text{C}$  NMR (125 MHz,  $\text{DMSO-}d_6$ ): 164.29, 159.31, 142.33, 142.23, 131.04, 130.68, 130.58, 130.47, 127.87, 122.05, 114.35, 113.38, 113.10, 112.84, 112.55, 55.13.

HRMS (ESI)  $m/z$ : calcd for  $\text{C}_{13}\text{H}_{10}\text{DOF}^+$  ( $[\text{M}]^+$ ) 203.0857; Found 203.0863.

The level of deuterium incorporation was estimated: 72% ( $\text{D}^a$ ) and 25% ( $\text{D}^b$ ) from  $^1\text{H}$  NMR; 52% (average) from GC-MS.

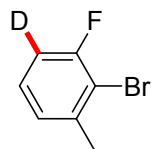

**2m:** Isolated yield: 86%, yellow oil.

$^1\text{H}$  NMR (300 MHz,  $\text{DMSO-}d_6$ ):  $\delta$  7.30 (t,  $J = 4.8$  Hz, 1 H), 7.17 ~ 7.20 (m, 1 H), 7.14 ~ 7.16 (m, **0.10 H**).

$^{19}\text{F}$  NMR (300 MHz,  $\text{DMSO-}d_6$ ): -116.0 (s, 0.12 F), -116.3 (s, 0.88 F).

$^{13}\text{C}$  NMR (125 MHz,  $\text{DMSO-}d_6$ ): 159.97, 156.75, 140.00, 128.64, 128.53, 126.49, 113.89, 113.59, 110.61, 110.35, 22.00.

HRMS (ESI)  $m/z$ : calcd for  $\text{C}_7\text{H}_5\text{DFBr}^+$  ( $[\text{M}]^+$ ) 188.9700; Found 188.9703.

The level of deuterium incorporation was estimated: 90% from  $^1\text{H}$  NMR; 85% from GC-MS.

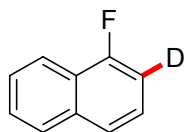

**2n:** Isolated yield: 95%, yellow oil.

$^1\text{H}$  NMR (300 MHz,  $\text{DMSO-}d_6$ ):  $\delta$  7.91 ~ 7.99 (m, 2 H), 7.70 (d,  $J = 6.3$  Hz, 1 H), 7.52 ~ 7.56 (m, 2 H), 7.40 ~ 7.45 (m, 1 H), 7.23 ~ 7.28 (m, **0.15 H**).

$^{19}\text{F}$  NMR (300 MHz,  $\text{DMSO-}d_6$ ): -123.5 (s, 0.18 F), -123.8 (s, 0.82 F).

$^{13}\text{C}$  NMR (125 MHz,  $\text{DMSO-}d_6$ ): 159.48, 159.17, 134.48, 127.65, 127.04, 126.60, 125.88, 125.76, 123.94, 122.85, 122.63, 119.74, 119.68, 109.72, 109.46.

HRMS (ESI)  $m/z$ : calcd for  $\text{C}_{10}\text{H}_6\text{DF}^+$  ( $[\text{M}]^+$ ) 147.0595; Found 147.0601.

The level of deuterium incorporation was estimated: 85% from  $^1\text{H}$  NMR; 88% from GC-MS.



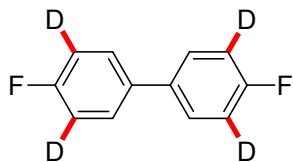

**2o**: Isolated yield: 90%, yellow oil.

$^1\text{H}$  NMR (300 MHz,  $\text{CDCl}_3$ ):  $\delta$  7.49 (d,  $J = 2.7$  Hz, 4 H), 7.12 (t,  $J = 5.4$  Hz, **1.40 H**).

$^{19}\text{F}$  NMR (300 MHz,  $\text{CDCl}_3$ ): -115.6 (s, 0.13 F), -115.9 (s, 0.46 F), -116.1 (s, 0.41 F).

$^{13}\text{C}$  NMR (125 MHz,  $\text{CDCl}_3$ ): 164.06, 160.80, 136.40, 128.62, 128.51, 128.41, 115.82, 115.54.

HRMS (ESI)  $m/z$ : calcd for  $\text{C}_{12}\text{H}_4\text{D}_4\text{F}_2^+$  ( $[\text{M}]^+$ ) 194.0845; Found 194.0848.

Deuterium incorporation expected at  $\delta$  7.12.

The level of deuterium incorporation was estimated: 65% from  $^1\text{H}$  NMR; 60% from GC-MS.

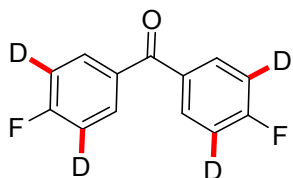

**2p**: Isolated yield: 88%, yellow oil.

$^1\text{H}$  NMR (300 MHz,  $\text{CDCl}_3$ ):  $\delta$  7.81 (d,  $J = 5.4$  Hz, 4 H), 7.17 (t,  $J = 9.0$  Hz, **0.37 H**).

$^{19}\text{F}$  NMR (300 MHz,  $\text{CDCl}_3$ ): -105.9 (s, 0.30 F), -106.2 (s, 1.70 F).

$^{13}\text{C}$  NMR (125 MHz,  $\text{CDCl}_3$ ): 193.74, 166.35, 164.32, 133.71, 132.38, 132.31, 115.62, 115.44, 115.20, 115.00.

HRMS (ESI)  $m/z$ : calcd for  $\text{C}_{13}\text{H}_4\text{D}_4\text{OF}_2^+$  ( $[\text{M}]^+$ ) 222.0794; Found 222.0802.

The level of deuterium incorporation was estimated: 91% from  $^1\text{H}$  NMR; 94% from GC-MS.

**General Procedure for  $\text{Ag}_2\text{CO}_3$  Catalyzed H/D Exchange of nitrogen-containing mono-fluorinated heteroarenes:** heteroarene (1 mmol) was added to a vigorously stirred solution of silver carbonate (138 mg, 0.5 mmol), sphos (205 mg, 0.5 mmol), potassium carbonate (138 mg, 1 mmol) and  $\text{D}_2\text{O}$  (200 mg, 10 mmol) in toluene (1 mL) in the air. The reaction mixture was stirred at  $90^\circ\text{C}$  for 12 h. Then the reaction was quenched with saturated  $\text{NH}_4\text{Cl}$  solution. The product was extracted with dichloromethane (3 x 20 mL). The combined organic layer was washed with brine and dried over  $\text{Na}_2\text{SO}_4$ . After removal of solvents under vacuum, the crude product was purified via column chromatography.

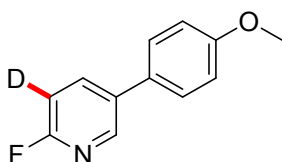

**4a:** Isolated yield: 90%, yellow oil.

$^1\text{H}$  NMR (300 MHz,  $\text{CDCl}_3$ ):  $\delta$  8.37 (s, 1 H), 7.91 (d,  $J$  = 6.3 Hz, 1 H), 7.45 (d,  $J$  = 8.7 Hz, 2 H), 7.00 (d,  $J$  = 8.7 Hz, 2 H), 6.95 (d,  $J$  = 3.0 Hz, **0.06 H**).

$^{19}\text{F}$  NMR (300 MHz,  $\text{CDCl}_3$ ): -71.4 (s, 0.10 F), -71.6 (s, 0.90 F).

$^{13}\text{C}$  NMR (125 MHz,  $\text{CDCl}_3$ ): 163.69, 161.79, 159.80, 145.35, 145.23, 139.25, 139.19, 19.15, 139.09, 134.49, 129.12, 128.11, 114.61, 109.42, 109.12, 55.35.

HRMS (ESI)  $m/z$ : calcd for  $\text{C}_{12}\text{H}_9\text{DNOF}^+$  ( $[\text{M}]^+$ ) 204.0809; Found 204.0820.

Deuterium incorporation expected at  $\delta$  6.95.

The level of deuterium incorporation was estimated: 94% from  $^1\text{H}$  NMR; 92% from GC-MS.

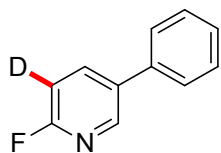

**4b:** Isolated yield: 80%, yellow oil.

$^1\text{H}$  NMR (300 MHz,  $\text{CDCl}_3$ ):  $\delta$  8.42 (s, 1 H), 7.96 (d,  $J$  = 6.6 Hz, 1 H), 7.55 ~ 7.38 (m, 5 H), 6.99 (d,  $J$  = 5.7 Hz, **0.12 H**).

$^{19}\text{F}$  NMR (300 MHz,  $\text{CDCl}_3$ ): -70.4 (s, 0.07 F), -70.7 (s, 0.92 F).

$^{13}\text{C}$  NMR (125 MHz,  $\text{CDCl}_3$ ): 164.06, 162.16, 145.87, 145.75, 139.61, 139.55, 136.70, 134.85, 129.13, 128.31, 127.03, 109.54, 109.21.

HRMS (ESI)  $m/z$ : calcd for  $\text{C}_{11}\text{H}_7\text{DNF}^+$  ( $[\text{M}]^+$ ) 174.0704; Found 174.0713.

Deuterium incorporation expected at  $\delta$  6.99.

The level of deuterium incorporation was estimated: 88% from  $^1\text{H}$  NMR; 83% from GC-MS.

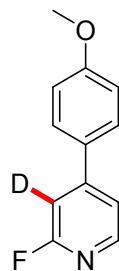

**4c:** Isolated yield: 96%, yellow oil.

$^1\text{H}$  NMR (300 MHz,  $\text{CDCl}_3$ ):  $\delta$  8.20 (d,  $J$  = 3.3 Hz, 1 H), 7.57 (d,  $J$  = 5.4 Hz, 2 H), 7.34 (d,  $J$  = 3.0 Hz, 1 H), 7.06 (s, **0.45 H**), 7.00 (d,  $J$  = 5.4 Hz, 2 H), 3.85 (s, 3 H).

$^{19}\text{F}$  NMR (300 MHz,  $\text{CDCl}_3$ ): -68.4 (s, 0.31 F), -68.6 (s, 0.69 F).

$^{13}\text{C}$  NMR (125 MHz,  $\text{CDCl}_3$ ): 165.56, 163.67, 161.01, 153.52, 153.44, 153.38, 147.87, 147.75, 129.22, 128.22, 118.83, 114.64, 106.30, 106.00, 55.14.

HRMS (ESI)  $m/z$ : calcd for  $\text{C}_{12}\text{H}_9\text{DNOF}^+$  ( $[\text{M}]^+$ ) 204.0809; Found 204.0819.

Deuterium incorporation expected at  $\delta$  7.06.

The level of deuterium incorporation was estimated: 55% from  $^1\text{H}$  NMR; 45% from GC-MS.

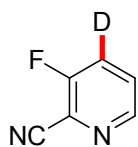

**4d**: Isolated yield: 53%, yellow oil.

$^1\text{H}$  NMR (300 MHz,  $\text{CDCl}_3$ ):  $\delta$  8.56 (d,  $J = 3.6$  Hz, 1 H), 7.59 (s, 1 H), 7.34 (s, **0.03 H**).

$^{19}\text{F}$  NMR (300 MHz,  $\text{CDCl}_3$ ): -114.9 (s, 0.02 F), -115.1 (s, 0.98 F).

$^{13}\text{C}$  NMR (125 MHz,  $\text{CDCl}_3$ ): 162.30, 160.15, 146.99, 128.53, 123.11, 112.85, 77.13.

HRMS (ESI)  $m/z$ : calcd for  $\text{C}_6\text{H}_2\text{DN}_2\text{F}^+$  ( $[\text{M}]^+$ ) 123.0343; Found 123.0340.

Deuterium incorporation expected at  $\delta$  7.34.

The level of deuterium incorporation was estimated: 97% from  $^1\text{H}$  NMR; 99% from GC-MS.

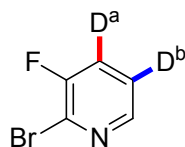

**4e<sup>1</sup>**: Isolated yield: 86%, yellow oil.

$^1\text{H}$  NMR (300 MHz,  $\text{DMSO}-d_6$ ):  $\delta$  8.24 ~ 8.25 (m, 1 H), 7.82 ~ 7.86 (m, **0.14 H**), 7.50 (t,  $J = 3.6$  Hz, **0.35 H**).

$^{19}\text{F}$  NMR (300 MHz,  $\text{DMSO}-d_6$ ): -111.3 (s, 0.13 F), -111.6 (s, 0.87 F).

HRMS (ESI)  $m/z$ : calcd for  $\text{C}_5\text{HD}_2\text{NFB}r^+$  ( $[\text{M}]^+$ ) 176.9558; Found 176.9566.

The level of deuterium incorporation was estimated as: 86% ( $\text{D}^a$ ) and 65% ( $\text{D}^b$ ) from  $^1\text{H}$  NMR; 73% (average) from GC-MS.

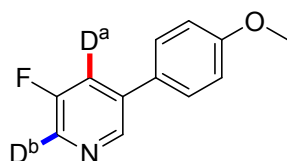

**4f**: Isolated yield: 80%, yellow oil.

$^1\text{H}$  NMR (300 MHz,  $\text{CDCl}_3$ ):  $\delta$  8.63 (s, 1 H), 8.39 (s, **0.93 H**), 7.53 (s, **0.05 H**), 7.50 (d,  $J = 5.4$  Hz, 2 H), 7.50 (d,  $J = 5.4$  Hz, 2 H).

$^{19}\text{F}$  NMR (300 MHz,  $\text{CDCl}_3$ ): -127.2 (s, 0.09 F), -127.4 (s, 0.66 F), -127.7 (s, 0.24 F).

$^{13}\text{C}$  NMR (125 MHz,  $\text{CDCl}_3$ ): 160.73, 160.21, 158.69, 143.69, 137.80, 136.01, 135.83, 128.70, 128.30, 120.41, 120.27, 114.68, 55.35.

HRMS (ESI)  $m/z$ : calcd for  $\text{C}_{12}\text{H}_8\text{D}_2\text{NOF}^+$  ( $[\text{M}]^+$ ) 205.0872; Found 205.0873.

Deuterium incorporation expected at  $\delta$  8.39 and 7.53.

The level of deuterium incorporation was estimated: 95% ( $\text{D}^a$ ) and 7% ( $\text{D}^b$ ) from  $^1\text{H}$  NMR; 92% (total), 46% (average) from GC-MS.

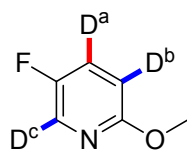

**4g:** Isolated yield: 50%, yellow oil.

$^1\text{H}$  NMR (300 MHz,  $\text{CDCl}_3$ ):  $\delta$  7.98 (s, **0.96 H**), 7.31 (s, **0.04 H**), 6.69 (s, **0.65 H**), 3.90 (s, 3 H).

$^{19}\text{F}$  NMR (300 MHz,  $\text{CDCl}_3$ ): -139.5 (s, 0.01 F), -139.7 (s, 0.99 F).

$^{13}\text{C}$  NMR (125 MHz,  $\text{CDCl}_3$ ): 160.33, 156.33, 154.38, 133.19, 132.98, 126.14, 125.91, 111.32, 77.12, 53.67.

HRMS (ESI)  $m/z$ : calcd for  $\text{C}_6\text{H}_3\text{D}_3\text{NOF}^+$  ( $[\text{M}]^+$ ) 130.0622; Found 130.0617.

Deuterium incorporation expected at  $\delta$  7.98, 7.31 and 6.69.

The level of deuterium incorporation was estimated: 96% ( $\text{D}^a$ ), 35% ( $\text{D}^b$ ) and 4% ( $\text{D}^c$ ) from  $^1\text{H}$  NMR; 125% (total), 42% (average) from GC-MS.

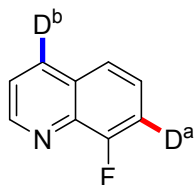

**4h:** Isolated yield: 89%, yellow oil.

$^1\text{H}$  NMR (300 MHz,  $\text{DMSO-}d_6$ ):  $\delta$  8.87 (d,  $J = 2.1$  Hz, 1 H), 8.34 (d,  $J = 6.3$  Hz, **0.72 H**), 7.72 (d,  $J = 6.3$  Hz, 1 H), 7.48 ~ 7.56 (m, **2.16 H**).

$^{19}\text{F}$  NMR (300 MHz,  $\text{DMSO-}d_6$ ): -125.8 (s, 0.21 F), -126.2 (s, 0.78 F).

$^{13}\text{C}$  NMR (125 MHz,  $\text{DMSO-}d_6$ ): 158.84, 155.46, 150.68, 135.88, 135.84, 129.51, 126.51, 126.42, 126.31, 123.94, 123.88, 122.39, 122.28, 113.62, 113.38.

HRMS (ESI)  $m/z$ : calcd for  $\text{C}_9\text{H}_4\text{D}_2\text{NF}^+$  ( $[\text{M}]^+$ ) 149.0610; Found 149.0619.

The level of deuterium incorporation was estimated as: 84% ( $\text{D}^a$ ) and 28% ( $\text{D}^b$ ) from  $^1\text{H}$  NMR; 68% (average) from GC-MS.

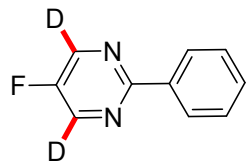

**4i:** Isolated yield: 86%, yellow oil.

$^1\text{H}$  NMR (300 MHz,  $\text{CDCl}_3$ ):  $\delta$  8.65 (s, **0.33 H**), 8.40 ~ 8.39 (m, 2 H), 7.49 ~ 7.48 (m, 3 H).

$^{19}\text{F}$  NMR (300 MHz,  $\text{CDCl}_3$ ): -140.5 (s, 0.03 F), -140.8 (s, 0.23 F), -141.0 (s, 0.74 F).

$^{13}\text{C}$  NMR (125 MHz,  $\text{CDCl}_3$ ): 161.08, 157.72, 155.57, 144.99, 144.83, 144.63, 144.43, 136.66, 130.60, 128.63, 128.11.

HRMS (ESI)  $m/z$ : calcd for  $\text{C}_{10}\text{H}_5\text{D}_2\text{N}_2\text{F}^+$  ( $[\text{M}]^+$ ) 176.0719; Found 176.0719.

Deuterium incorporation expected at  $\delta$  8.65.

The level of deuterium incorporation was estimated as: 84% from  $^1\text{H}$  NMR; 76% from GC-MS.

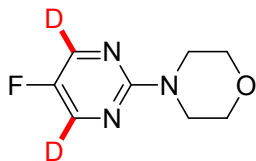

**4j**: Isolated yield: 93%, yellow oil.

$^1\text{H}$  NMR (300 MHz,  $\text{CDCl}_3$ ):  $\delta$  8.20 (s, **0.16 H**), 3.76 ~ 3.71 (m, 4 H).

$^{19}\text{F}$  NMR (300 MHz,  $\text{CDCl}_3$ ): -156.1 (s, 0.03 F), -156.3 (s, 0.27 F), -156.5 (s, 0.70 F).

$^{13}\text{C}$  NMR (125 MHz,  $\text{CDCl}_3$ ): 158.98, 153.39, 150.09, 145.27, 144.99, 66.70, 44.79.

HRMS (ESI)  $m/z$ : calcd for  $\text{C}_8\text{H}_8\text{D}_2\text{N}_3\text{OF}^+$  ( $[\text{M}]^+$ ) 185.0933; Found 185.0946.

Deuterium incorporation expected at  $\delta$  8.20.

The level of deuterium incorporation was estimated as: 92% from  $^1\text{H}$  NMR; 88% from GC-MS.

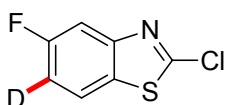

**4k**: Isolated yield: 80%, yellow oil.

$^1\text{H}$  NMR (300 MHz,  $\text{DMSO}-d_6$ ):  $\delta$  7.97 (d,  $J = 1.8$  Hz, **0.08 H**), 7.95 (q,  $J = 3.6$  Hz, 1 H), 7.38 (t,  $J = 6.6$  Hz, 1 H).

$^{19}\text{F}$  NMR (300 MHz,  $\text{DMSO}-d_6$ ): -114.2 (s, 0.11 F), -114.5 (s, 0.89 F).

$^{13}\text{C}$  NMR (125 MHz,  $\text{DMSO}-d_6$ ): 161.50, 158.17, 152.37, 147.22, 136.86, 136.70, 123.82, 123.69, 115.49, 115.27, 109.03, 108.68.

HRMS (ESI)  $m/z$ : calcd for  $\text{C}_7\text{H}_2\text{DNFSCl}^+$  ( $[\text{M}]^+$ ) 187.9722; Found 187.926.

The level of deuterium incorporation was estimated as: 92% from  $^1\text{H}$  NMR; 80% from GC-MS.

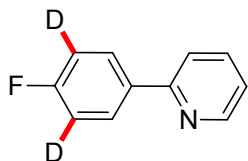

**4l**: Isolated yield: 90%, yellow oil.

$^1\text{H}$  NMR (300 MHz,  $\text{CDCl}_3$ ):  $\delta$  8.65 ~ 8.67 (m, 1 H), 7.96 (d,  $J = 4.2$  Hz, 2 H), 7.70 ~ 7.74 (m, 1 H), 7.64 ~ 7.66 (m, 1 H), 7.19 ~ 7.22 (m, 1 H), 7.14 (t,  $J = 6.6$  Hz, **0.41 H**).

$^{19}\text{F}$  NMR (300 MHz,  $\text{CDCl}_3$ ): -113.0 (s, 0.02 F), -113.3 (s, 0.23 F), -113.6 (s, 0.75 F).

$^{13}\text{C}$  NMR (125 MHz,  $\text{CDCl}_3$ ): 164.78, 162.34, 156.53, 149.69, 136.86, 136.80, 128.81, 128.70, 128.63, 122.13, 120.31, 115.84, 115.63, 115.60, 115.38, 115.35, 115.13.

HRMS (ESI)  $m/z$ : calcd for  $\text{C}_{14}\text{H}_6\text{D}_2\text{NF}^+$  ( $[\text{M}]^+$ ) 175.0766; Found 175.0767.

The level of deuterium incorporation was estimated as: 80% from  $^1\text{H}$  NMR; 86% from GC-MS.

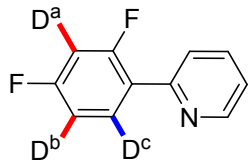

**4m**: Isolated yield: 96%, yellow oil.

$^1\text{H}$  NMR (300 MHz,  $\text{CDCl}_3$ ):  $\delta$  8.62 (d,  $J = 4.5$  Hz, 1 H), 7.92 (t,  $J = 7.5$  Hz, **0.64 H**), 7.66 (d,  $J = 3.9$  Hz, 2 H), 7.16 (dd,  $J_1 = 4.5$  Hz,  $J_2 = 8.7$  Hz, 1 H), 6.92 (t,  $J = 8.4$  Hz, **0.07 H**), 6.82 (dd,  $J_1 = 9.0$  Hz,  $J_2 = 11.4$  Hz, **0.07 H**).

$^{19}\text{F}$  NMR (300 MHz,  $\text{CDCl}_3$ ): -109.4 (s, 0.10 F), -109.7 (s, 0.87 F), -112.9 (s, 0.04 F), -113.2 (s, 1.00 F).

$^{13}\text{C}$  NMR (125 MHz,  $\text{CDCl}_3$ ): 164.18, 164.09, 162.19, 162.09, 161.60, 161.51, 159.59, 159.50, 152.52, 149.74, 136.44, 132.05, 132.01, 131.97, 131.94, 124.20, 124.13, 123.80, 123.72, 122.38, 104.51, 104.31, 104.11, 103.90.

HRMS (ESI)  $m/z$ : calcd for  $\text{C}_{11}\text{H}_4\text{D}_3\text{NF}_2^+$  ( $[\text{M}]^+$ ) 194.0735; Found 194.0742.

The level of deuterium incorporation was estimated as: 93% ( $\text{D}^a$ ), 93% ( $\text{D}^b$ ) and 36% ( $\text{D}^c$ ) from  $^1\text{H}$  NMR; 86% (average) from GC-MS.

**Procedure for synthesis of D-iloperidone:** iloperidone (426 mg, 1 mmol) was added to a vigorously stirred solution of silver carbonate (138 mg, 0.5 mmol), sphos (205 mg, 0.5 mmol), potassium carbonate (138 mg, 1 mmol) and D<sub>2</sub>O (200 mg, 10 mmol) in toluene (1 mL) in the air. The reaction mixture was stirred at 90°C for 12 h. Then the reaction was quenched with saturated NH<sub>4</sub>Cl solution. The product was extracted with dichloromethane (3 x 20 mL). The combined organic layer was washed with brine and dried over Na<sub>2</sub>SO<sub>4</sub>. After removal of solvents under vacuum, the crude product was purified via column chromatography.

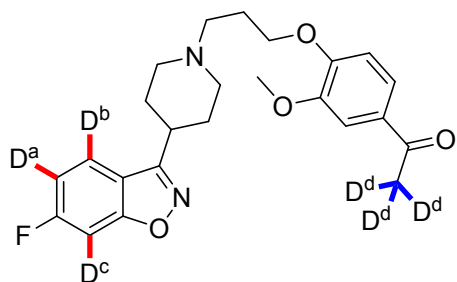

**6a:** Isolated yield: 80%

<sup>1</sup>H NMR (300 MHz, CDCl<sub>3</sub>): δ 7.66 (d, *J* = 3.9 Hz, **0.44 H**), 7.53 (dd, *J*<sub>1</sub> = 1.5 Hz, *J*<sub>2</sub> = 6.0 Hz, 1 H), 7.50 (d, *J* = 1.5 Hz, 1 H), 7.22 (d, *J* = 6.3 Hz, **0.08 H**), 7.01 ~ 7.05 (m, **0.09 H**), 6.91 (d, *J* = 6.3 Hz, 1 H), 4.17 (t, *J* = 5.1 Hz, 2 H), 3.90 (s, 3 H), 3.04 ~ 3.07 (m, 3 H), 2.57 (t, *J* = 5.1 Hz, 2 H), 2.51 (s, **0.33 H**), 2.02 ~ 2.19 (m, 8 H).

<sup>19</sup>F NMR (300 MHz, CDCl<sub>3</sub>): -109.7 (s, 0.19 F), -110.0 (s, 0.81 F).

<sup>13</sup>C NMR (125 MHz, CDCl<sub>3</sub>): 196.33, 165.20, 161.79, 160.57, 152.43, 148.82, 129.96, 122.70, 121.96, 121.81, 110.84, 110.08, 66.92, 55.55, 54.59, 53.08, 34.09, 30.10, 26.14.

HRMS (ESI) *m/z*: calcd for C<sub>24</sub>H<sub>21</sub>D<sub>6</sub>N<sub>2</sub>O<sub>4</sub>F<sup>+</sup> ([M]<sup>+</sup>) 432.2331; Found 432.2354.

The level of deuterium incorporation was estimated as: 92% (D<sup>a</sup>), 56% (D<sup>b</sup>), 92% (D<sup>c</sup>) and 90% (D<sup>d</sup>) from <sup>1</sup>H NMR; 90% (average) from GC-MS.

## Scheme S1: Kinetic Isotope Effect Study

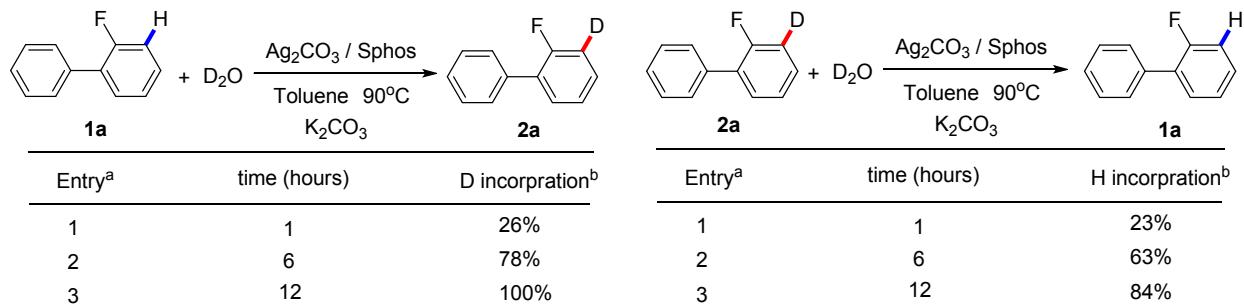

<sup>a</sup>The reaction was conducted on 0.3 mmol of **1a**, D<sub>2</sub>O, 50 mol % of Ag<sub>2</sub>CO<sub>3</sub>, 50 mol % of SPhos, 1 equiv of K<sub>2</sub>CO<sub>3</sub> in 1 mL of Toluene at 90°C. <sup>b</sup>Determined by GC-MS

<sup>a</sup>The reaction was conducted on 0.3 mmol of **2a**, H<sub>2</sub>O, 50 mol % of Ag<sub>2</sub>CO<sub>3</sub>, 50 mol % of SPhos, 1 equiv of K<sub>2</sub>CO<sub>3</sub> in 1 mL of Toluene at 90°C. <sup>b</sup>Determined by GC-MS

Reactions to incorporate deuterium were carried out following “General Procedure for Ag<sub>2</sub>CO<sub>3</sub> Catalyzed H/D Exchange with 2-fluorobiphenyl (**1a**) as example”, using 2-fluorobiphenyl (172 mg, 1 mmol) as model substrate.

Reactions to incorporate hydrogen were carried out following the same procedure as above, using H<sub>2</sub>O instead of D<sub>2</sub>O as reagent.

The deuterium/hydrogen incorporation was assigned by GC-MS result of small aliquots of organic phase of the reaction mixture sampled at different time.

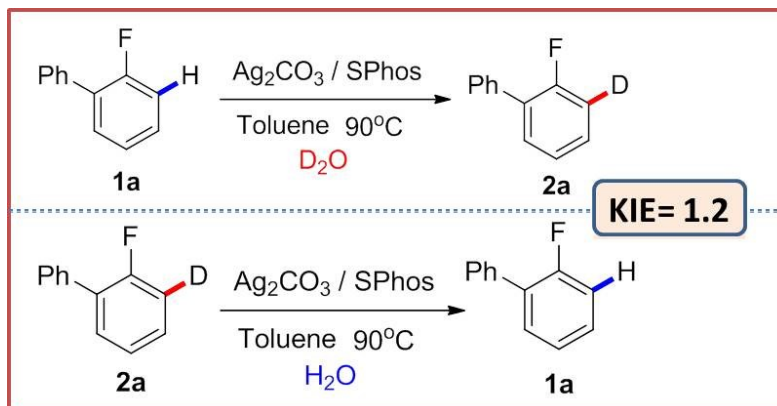



**Procedure for Ag<sub>2</sub>CO<sub>3</sub> Catalyzed H/D Exchange with TEMPO as additive:** 2-fluorobiphenyl (1 mmol) was added to a vigorously stirred solution of silver carbonate (138 mg, 0.5 mmol), Sphos (205 mg, 0.5 mmol) and potassium carbonate (138 mg, 1 mmol) in toluene (1 mL) in the air. Then TEMPO (2 mmol) was added to the solution. The reaction mixture was stirred at 90°C for 12 h. Then the reaction was quenched with saturated NH<sub>4</sub>Cl solution. The product was extracted with dichloromethane (3 x 20 mL). The combined organic layer was washed with brine and dried over Na<sub>2</sub>SO<sub>4</sub>. After removal of solvents under vacuum, the crude product was purified via column chromatography. The level of deuterium incorporation of the product was determined by <sup>1</sup>H NMR as 94%, which suggested that a mechanism involving free radicals should be ruled out.

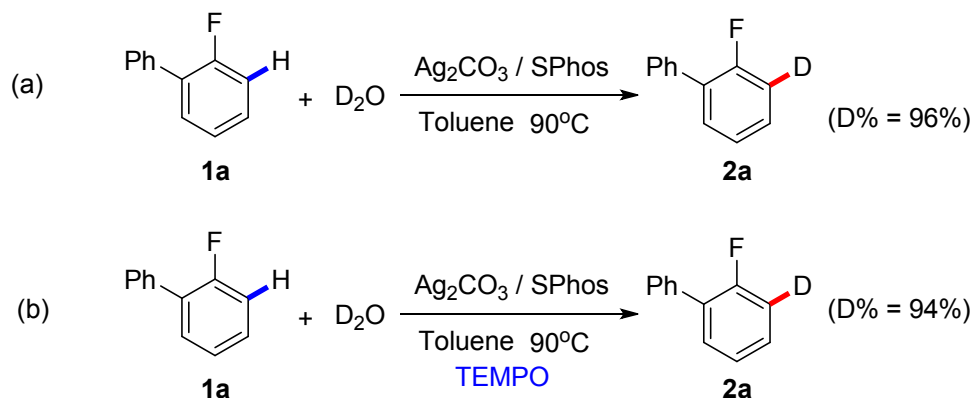

**Reference:**

1. Queguiner, M. M. G. *Tetrahedron* **1986**, *42*, 2253-2262.

# Proton, Fluorine and Carbon NMR Spectra:

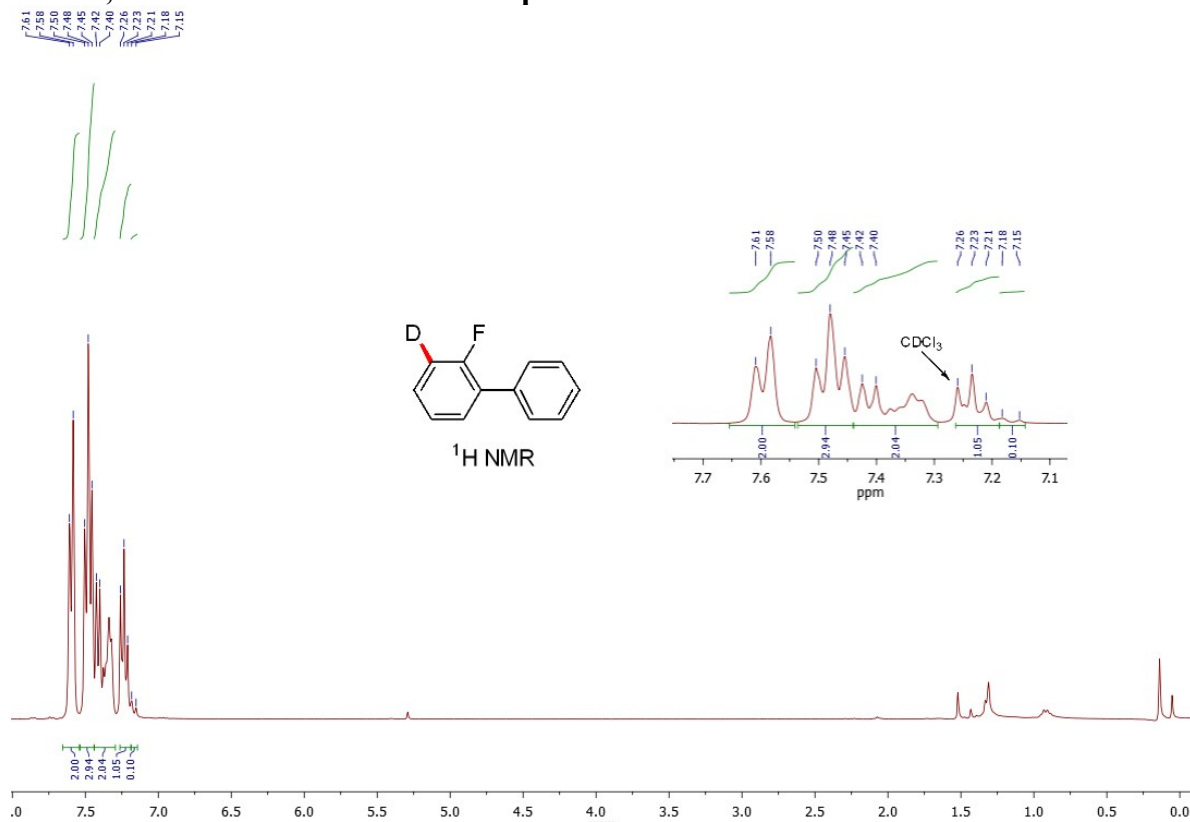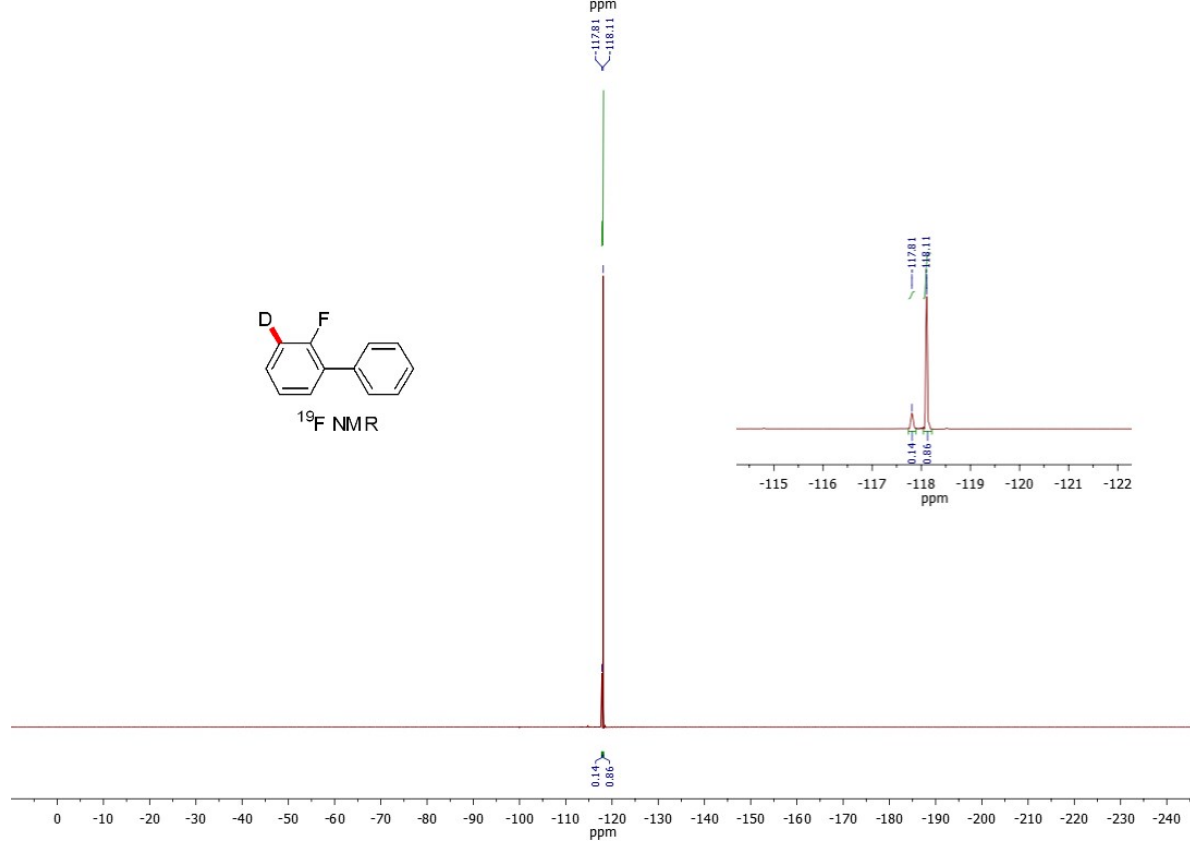

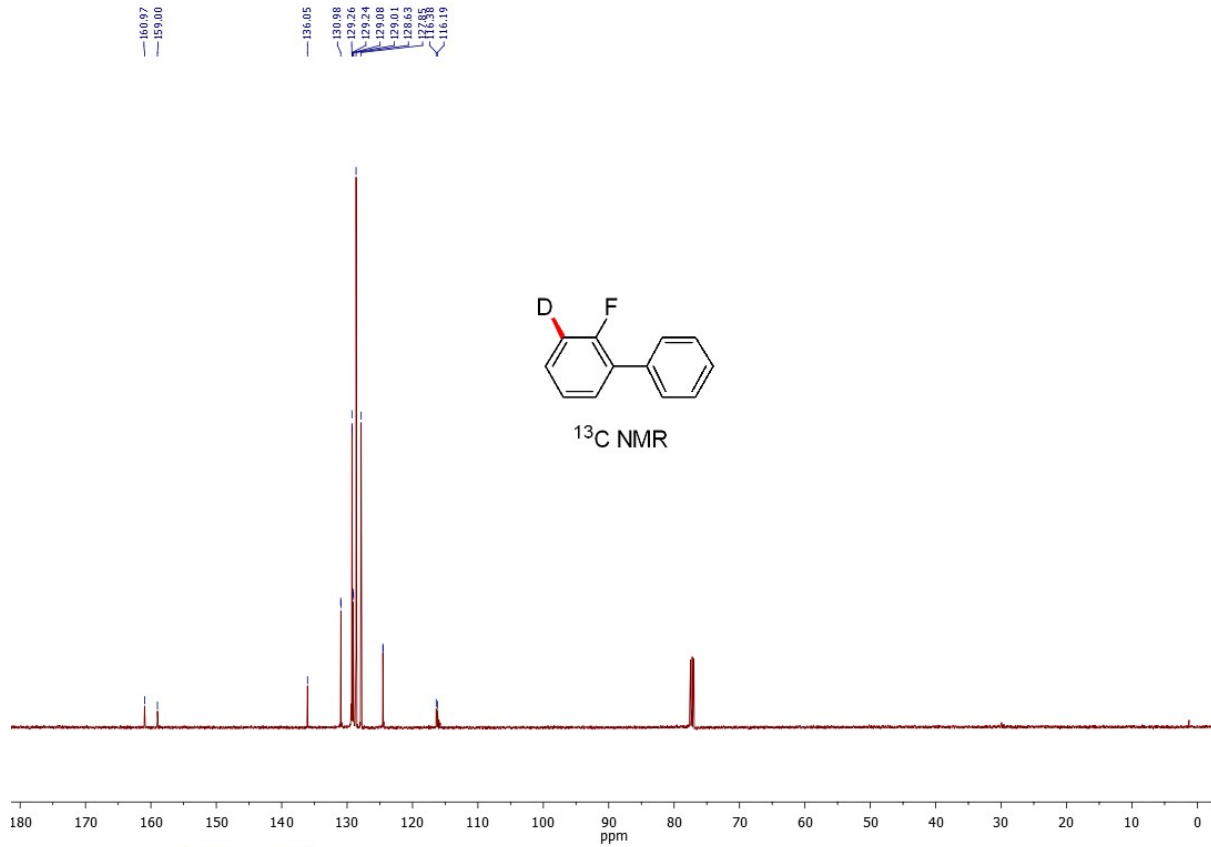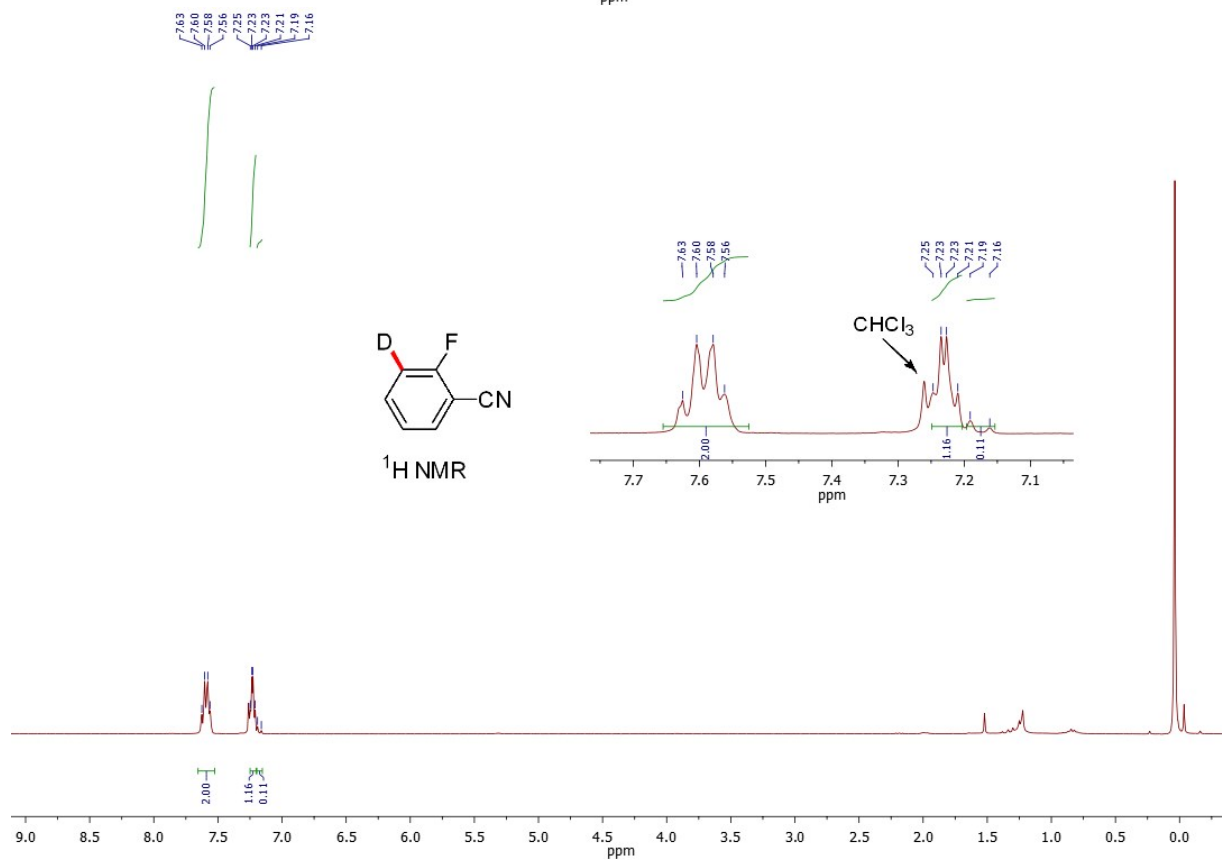

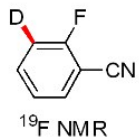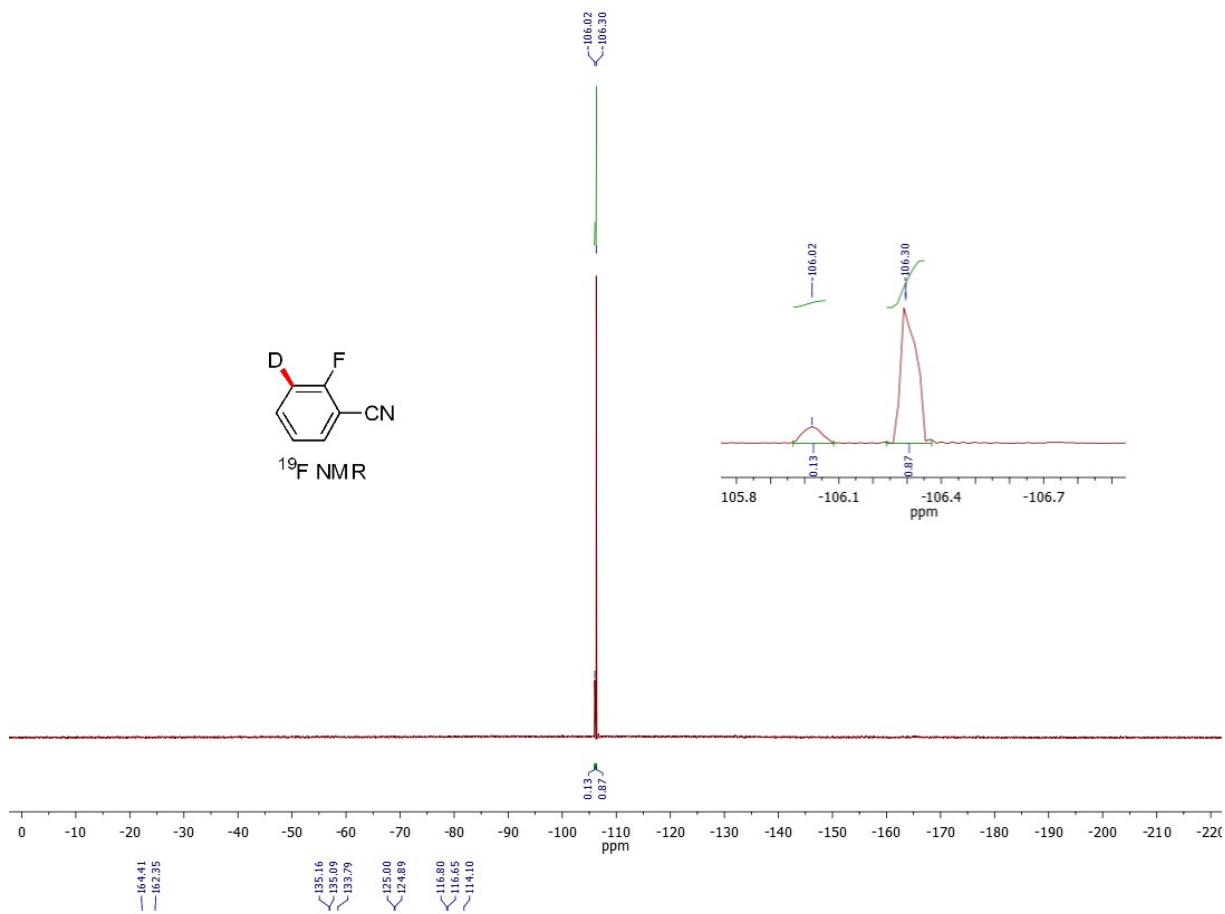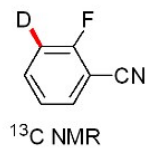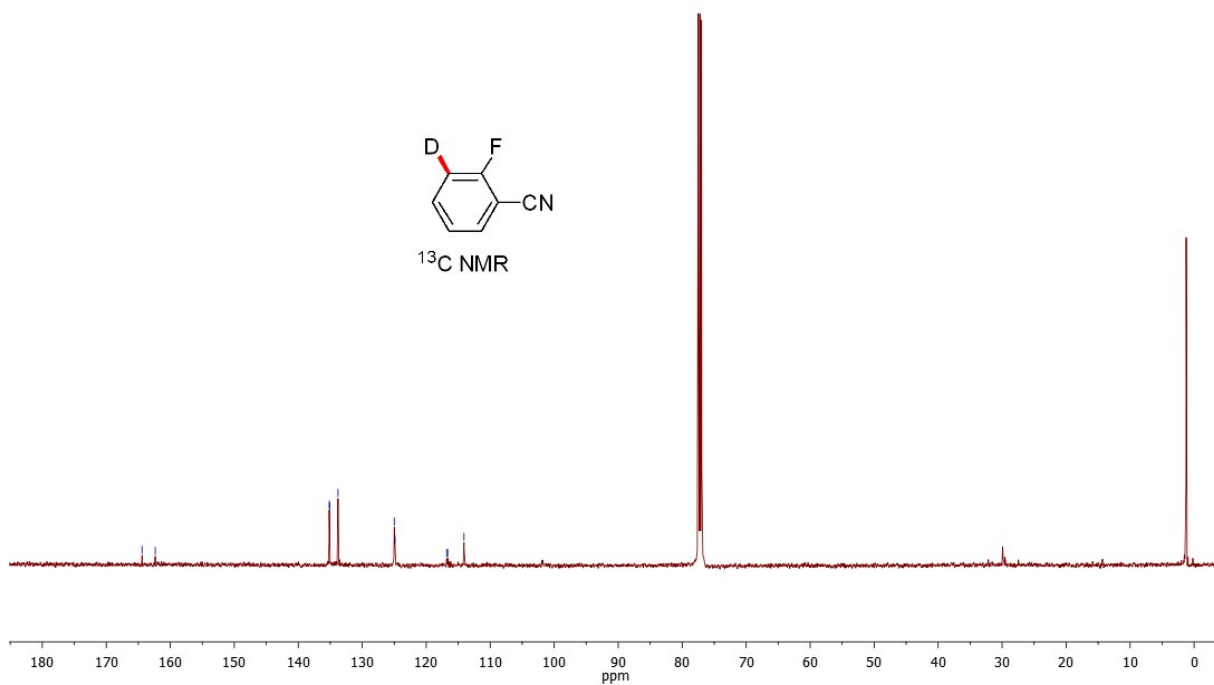

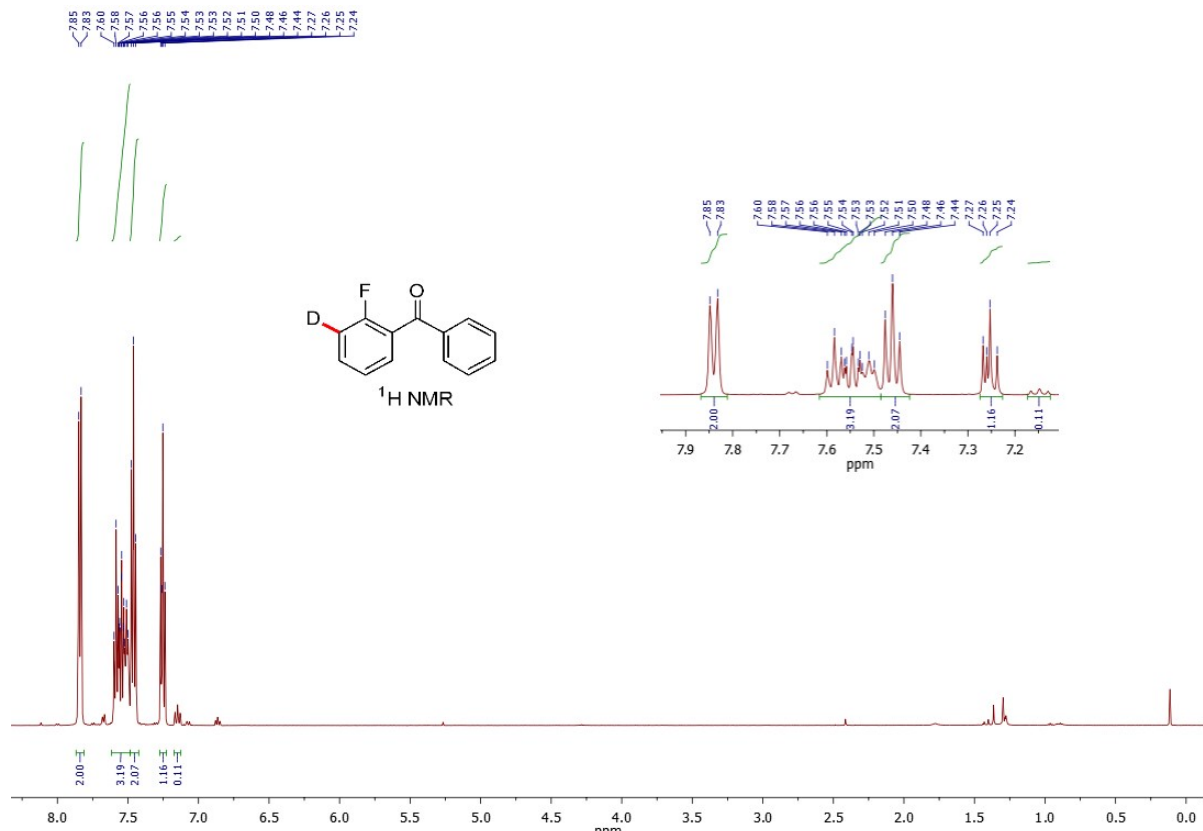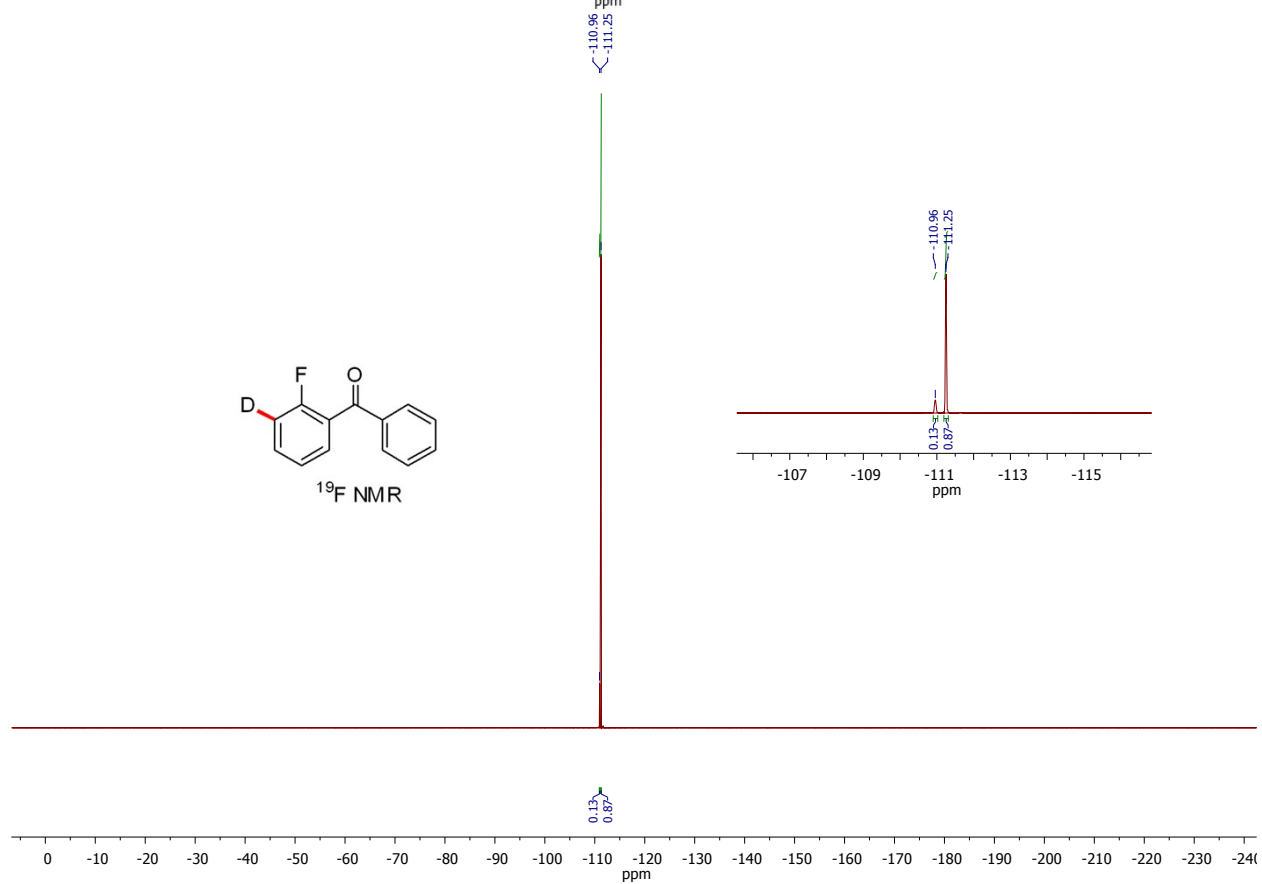

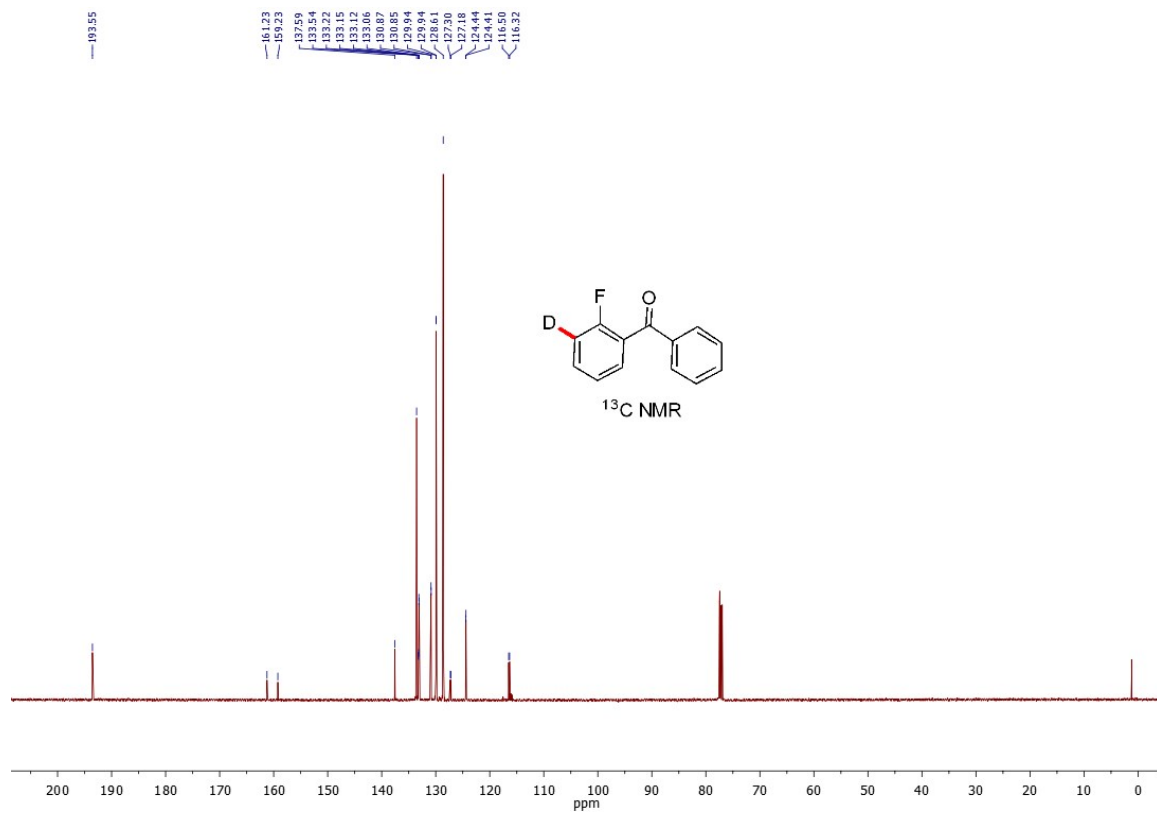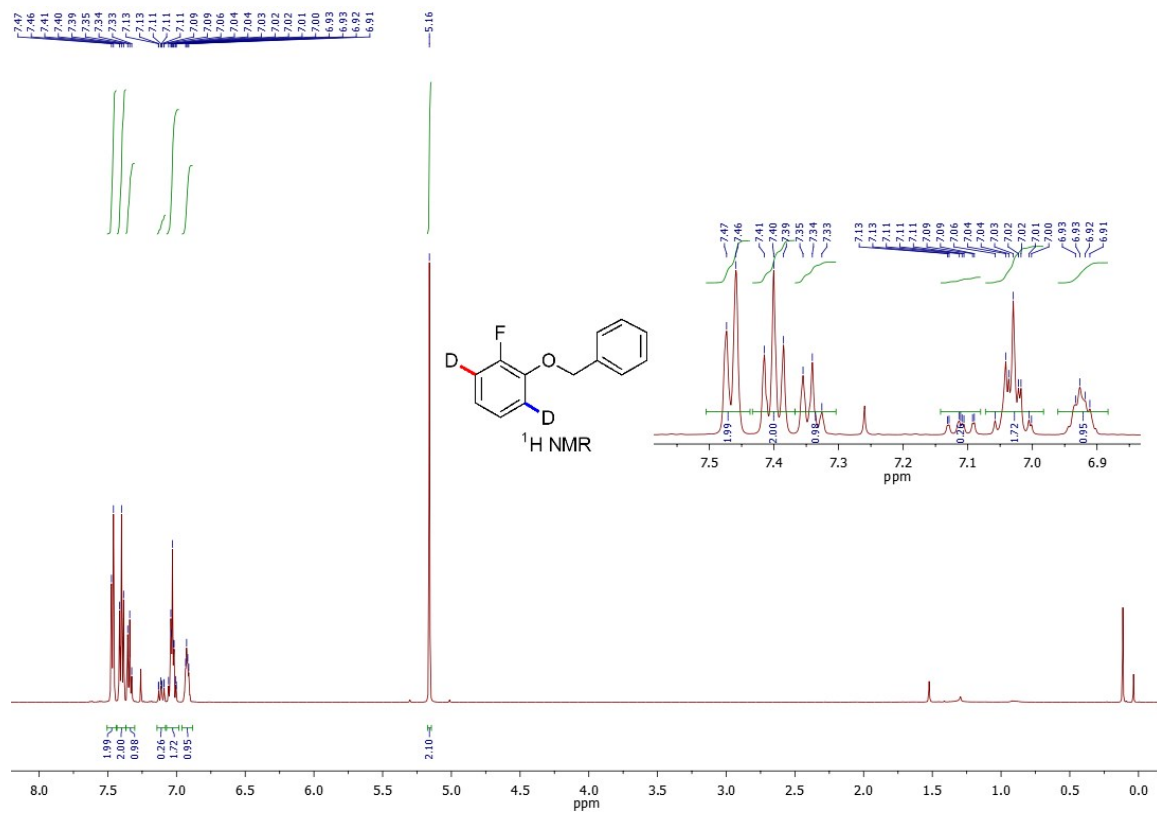

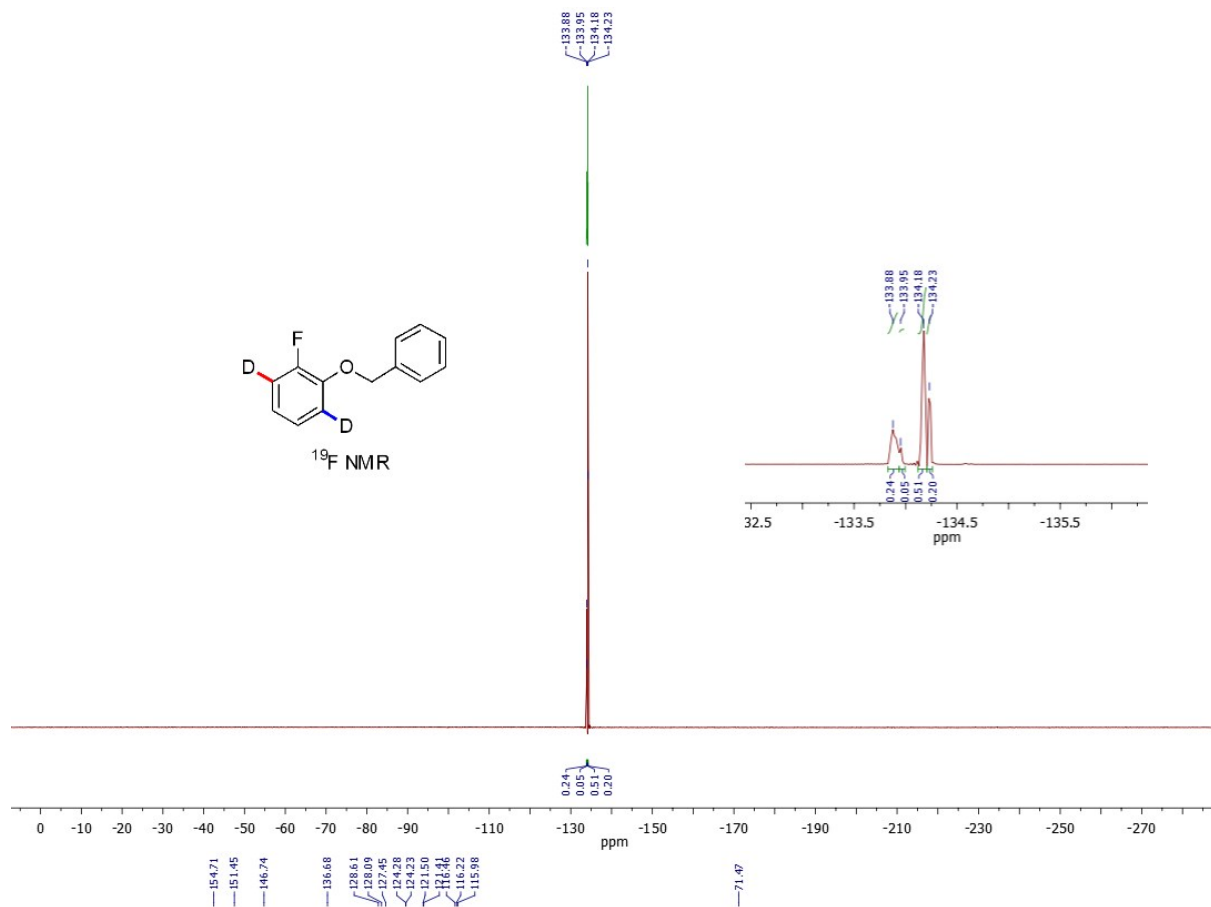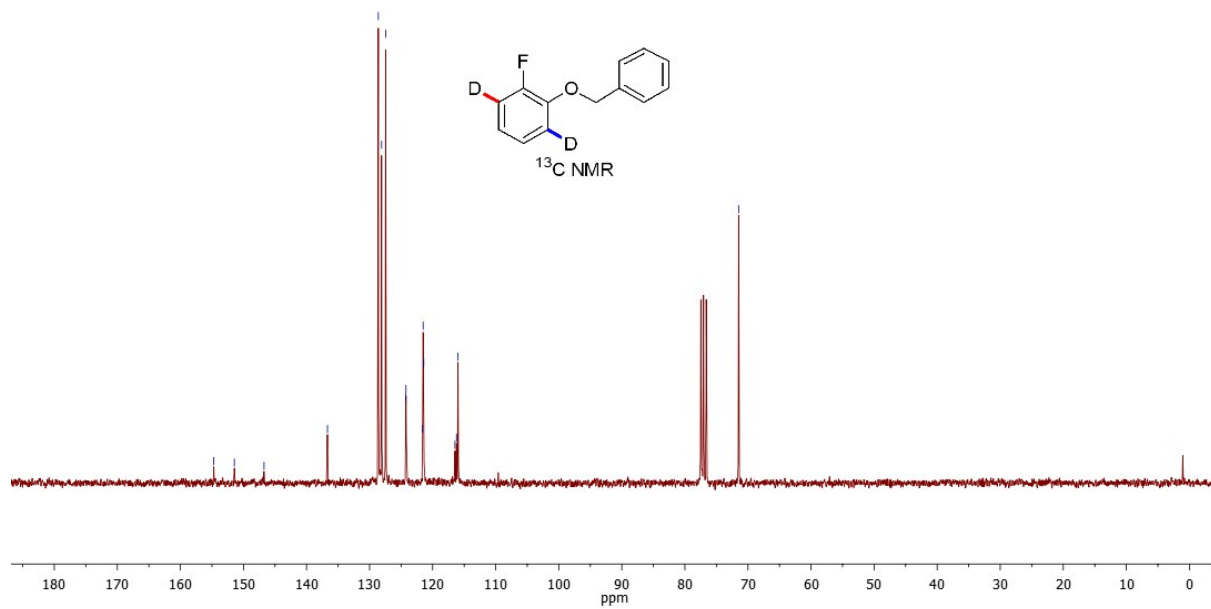

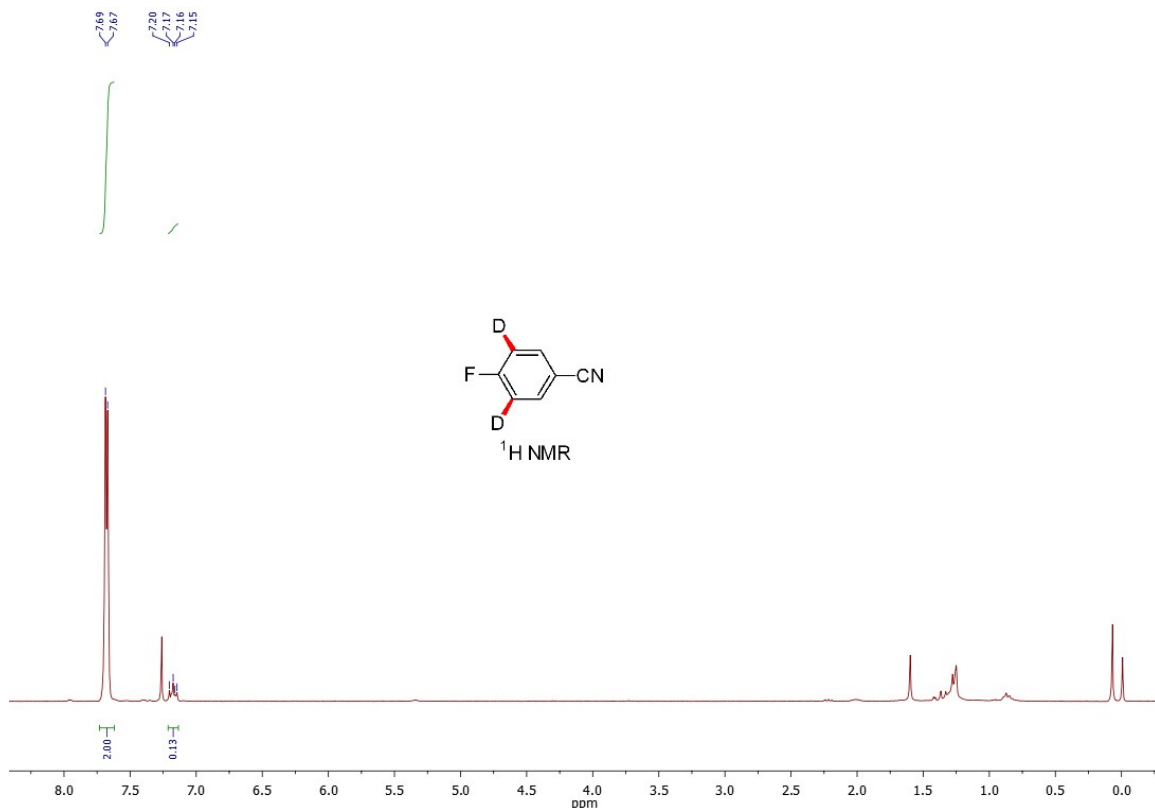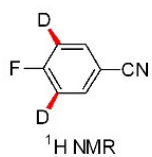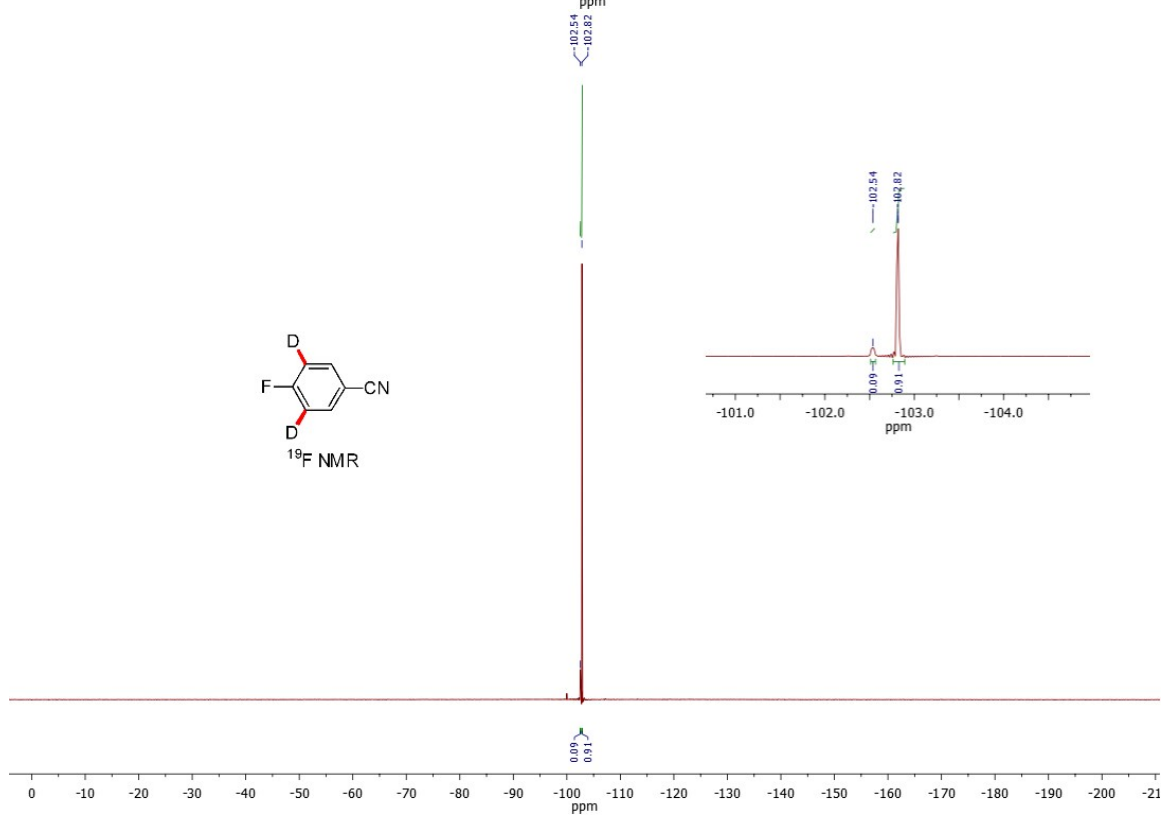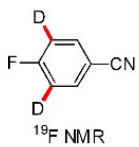



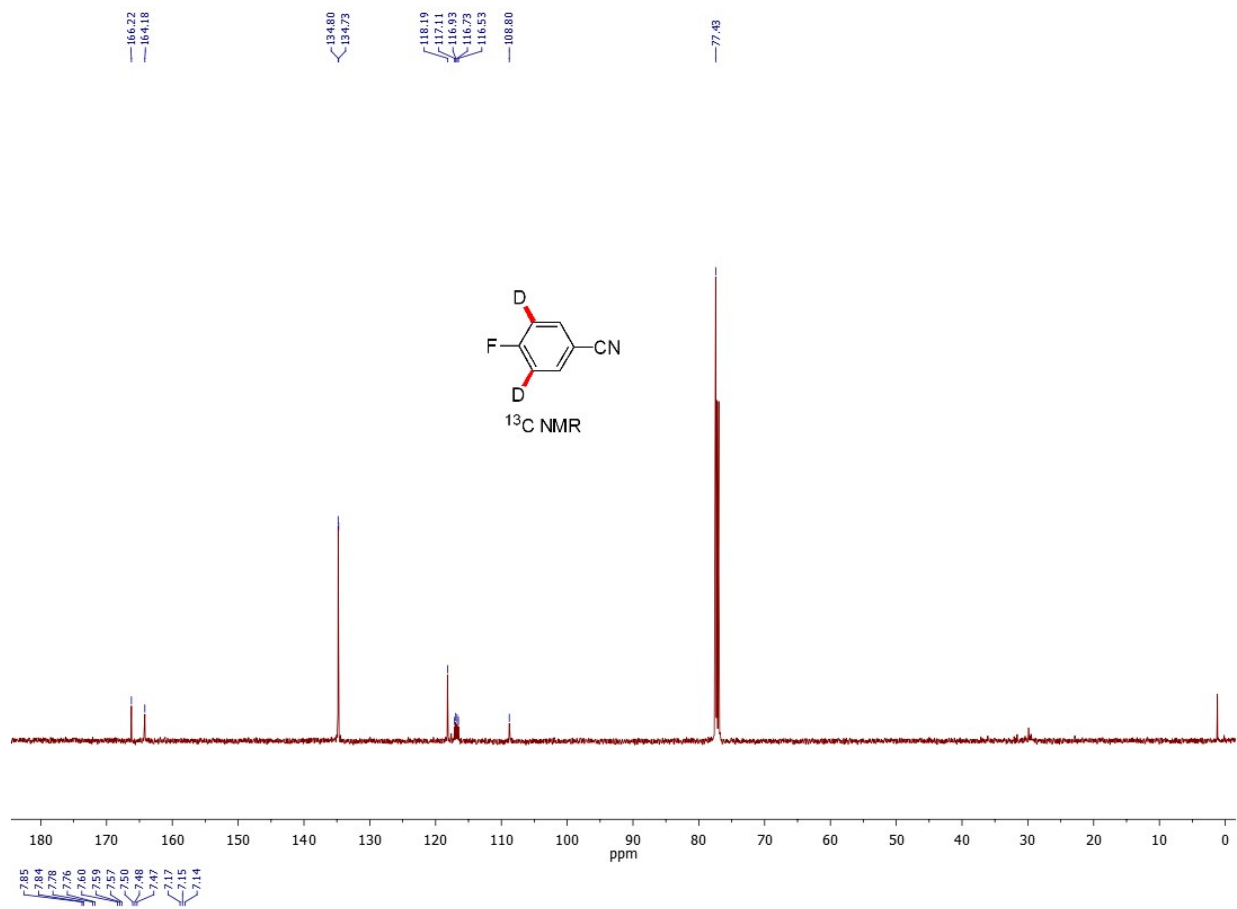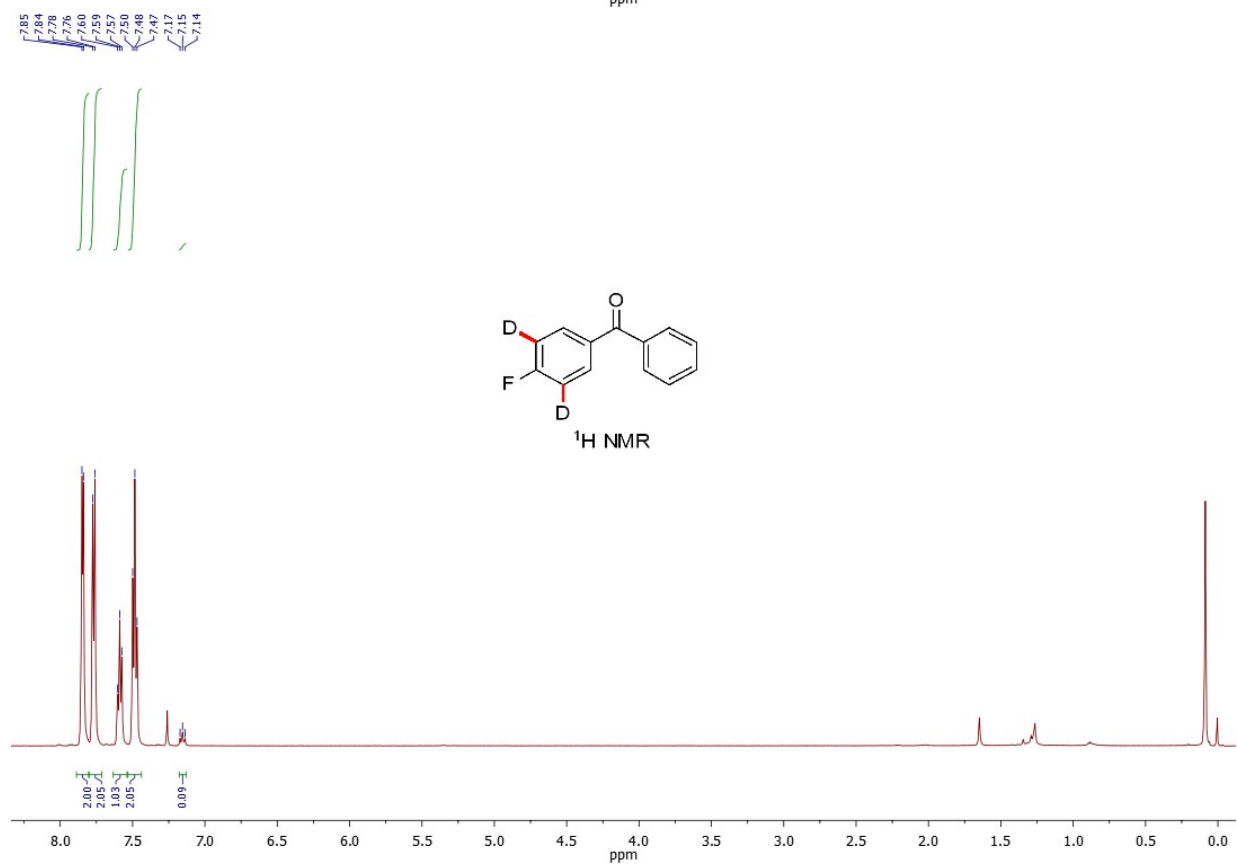

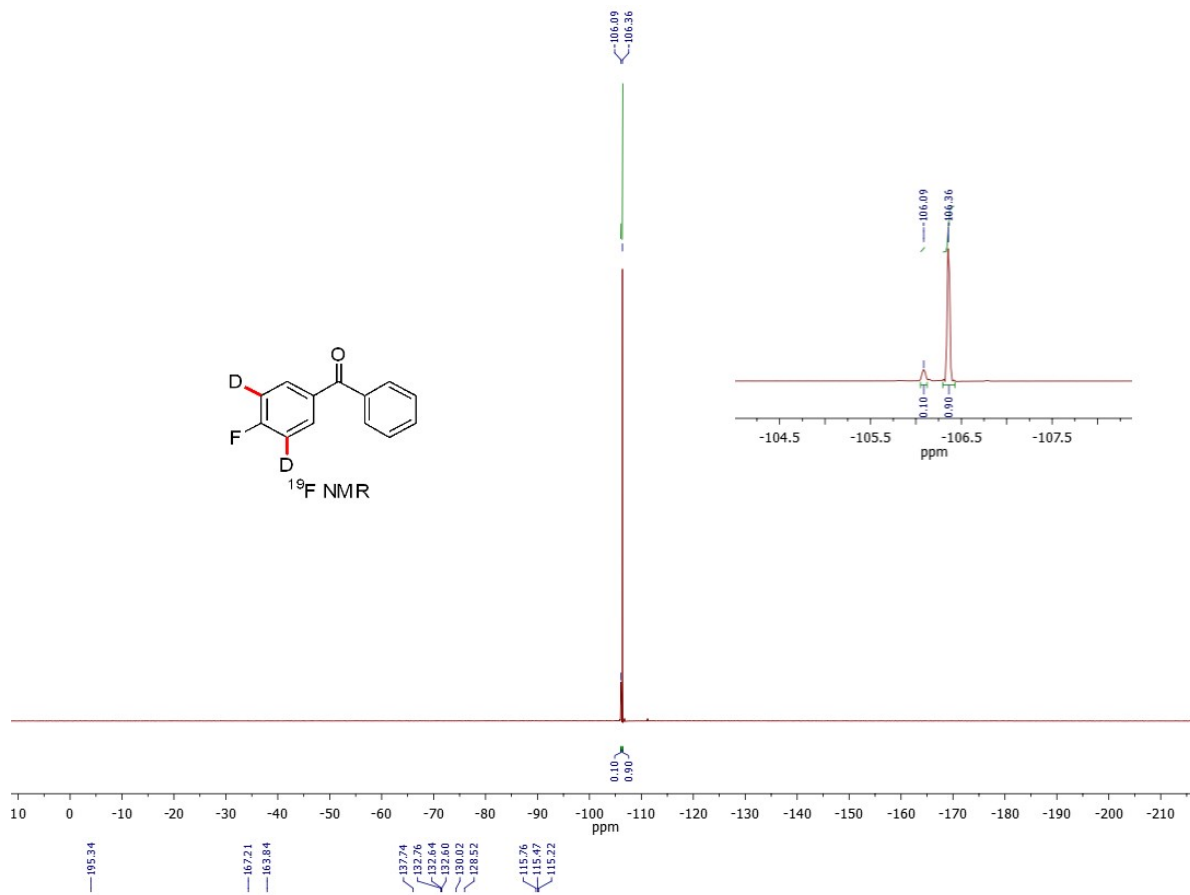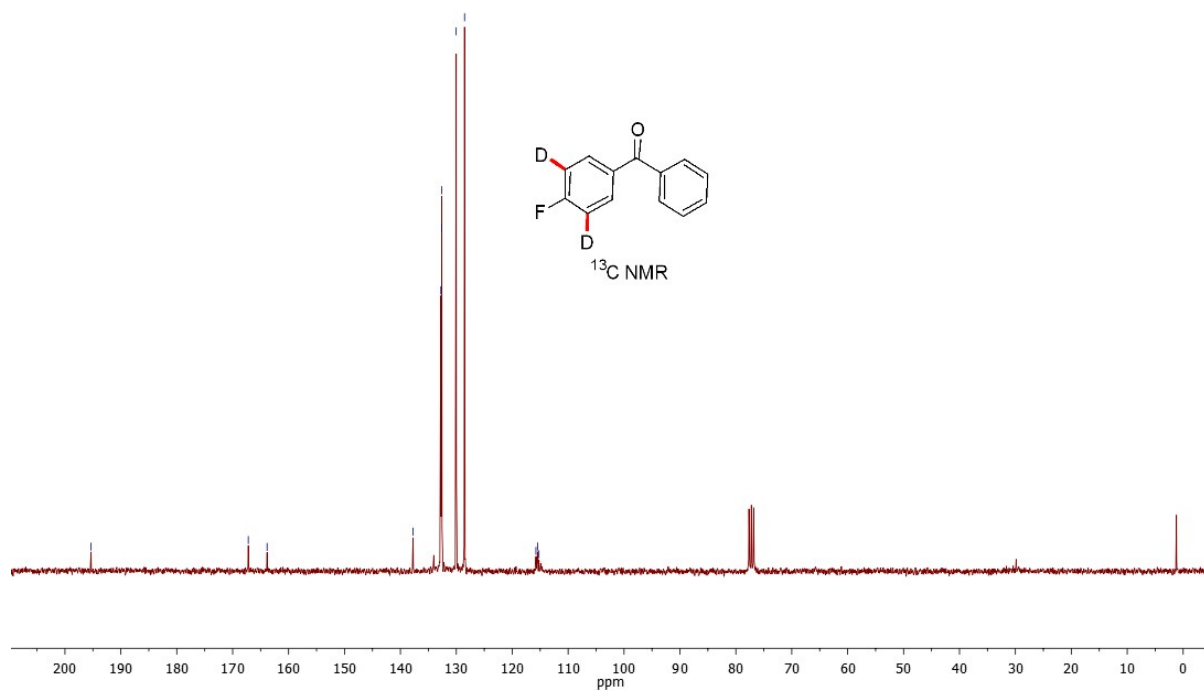

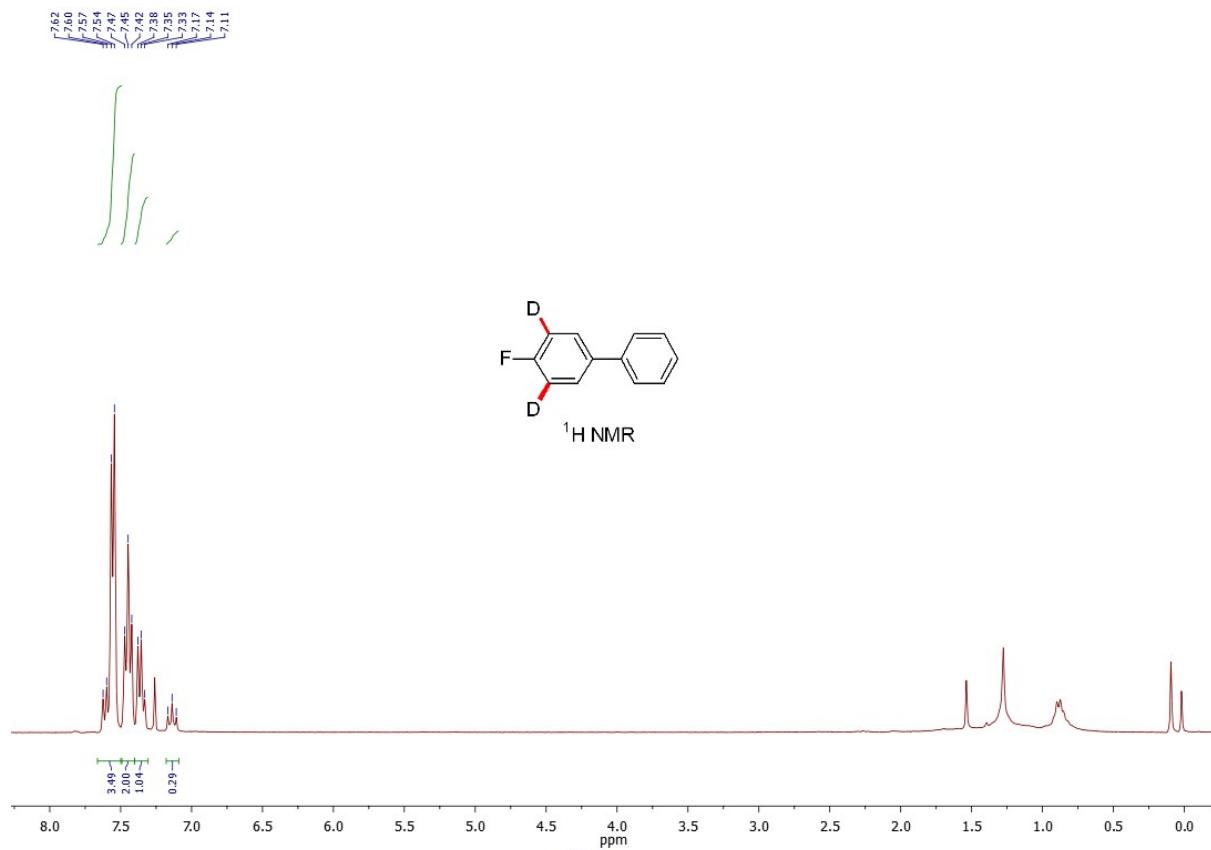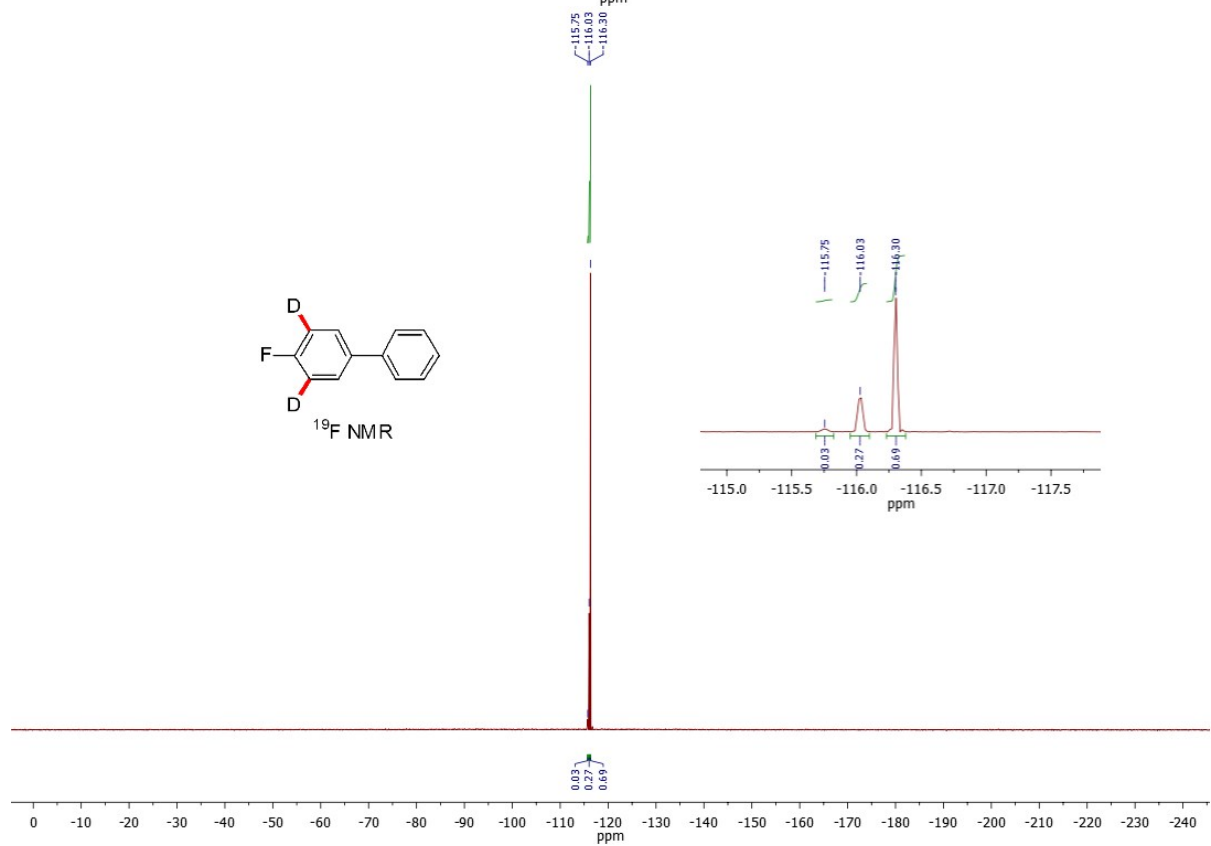

140.52  
129.04  
128.97  
128.85  
128.74  
128.68  
127.98  
127.25  
115.97  
115.69

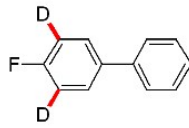

<sup>13</sup>C NMR

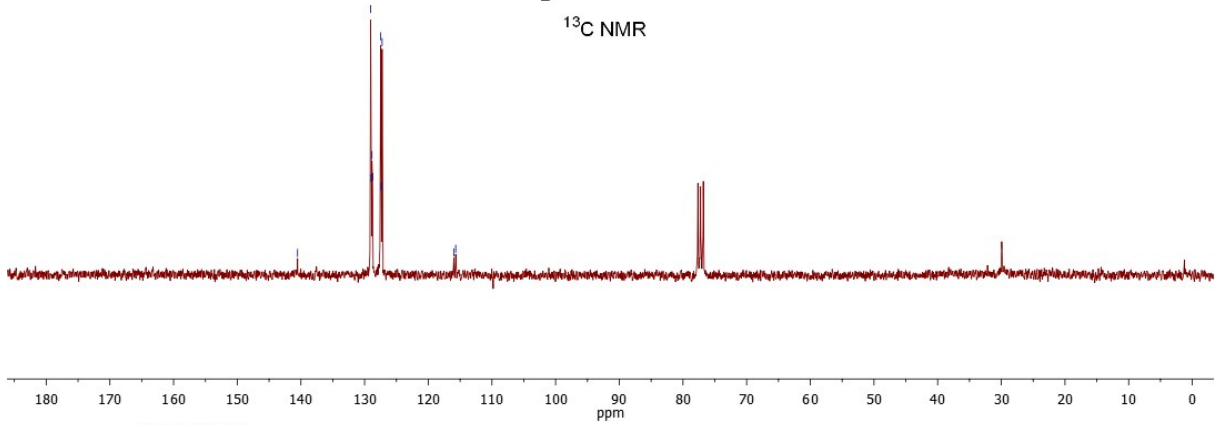

7.51  
7.46  
7.13  
7.11  
7.08  
6.99  
6.96

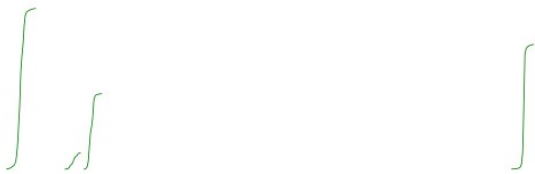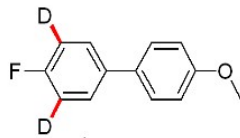

<sup>1</sup>H NMR

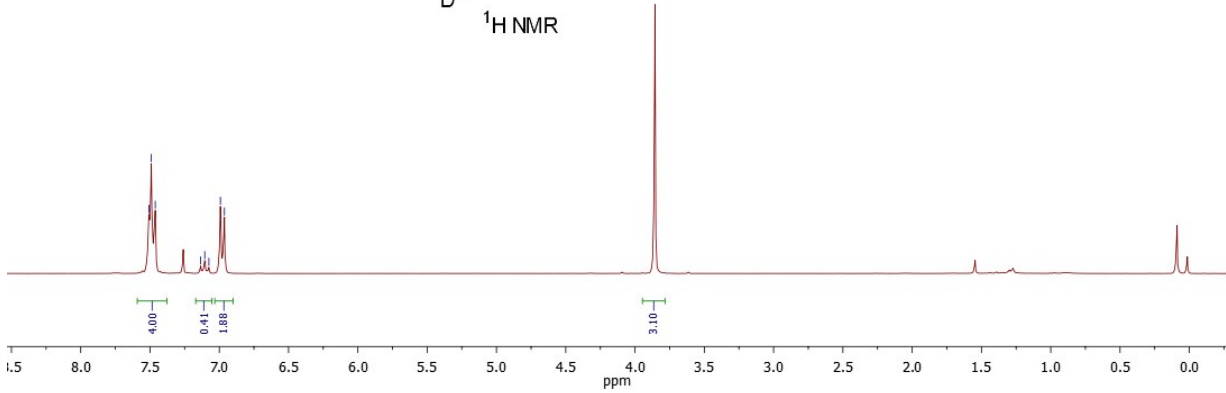

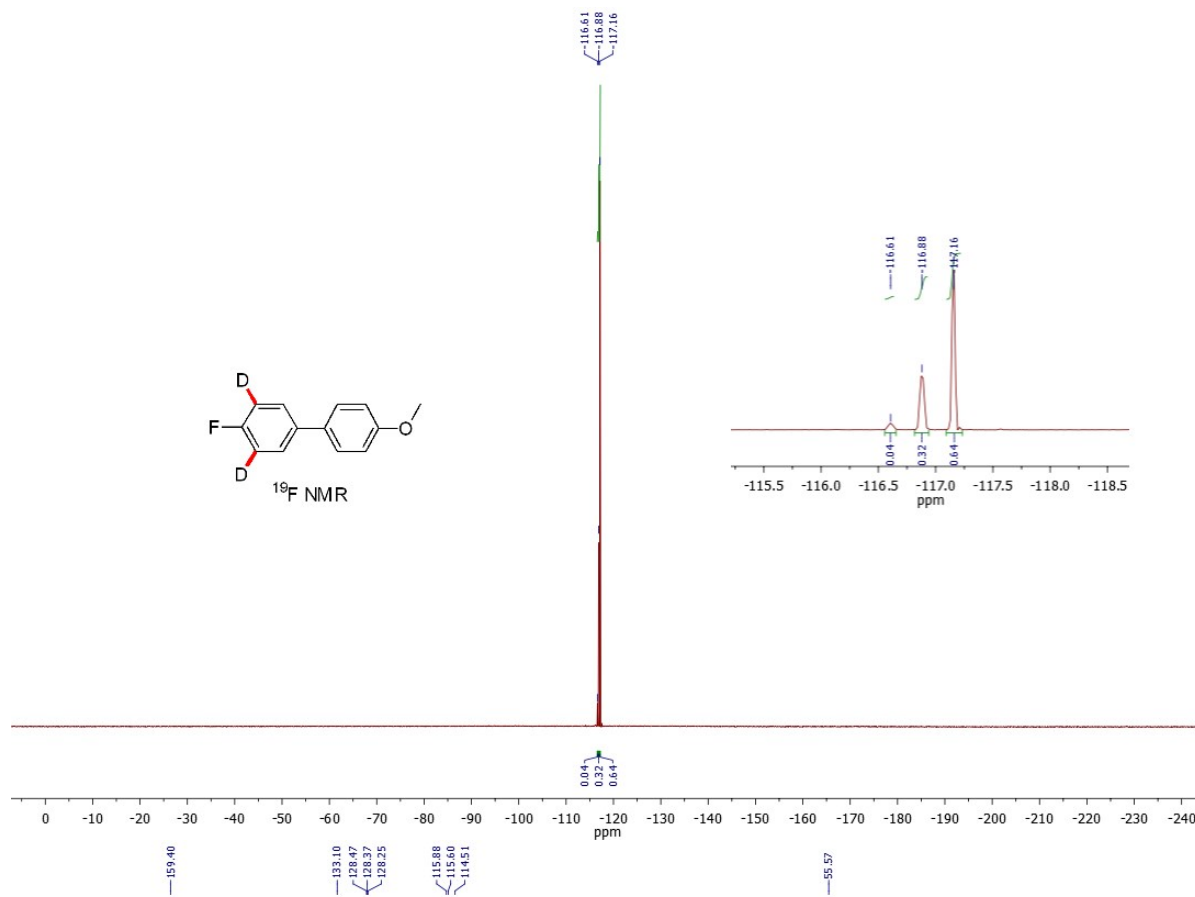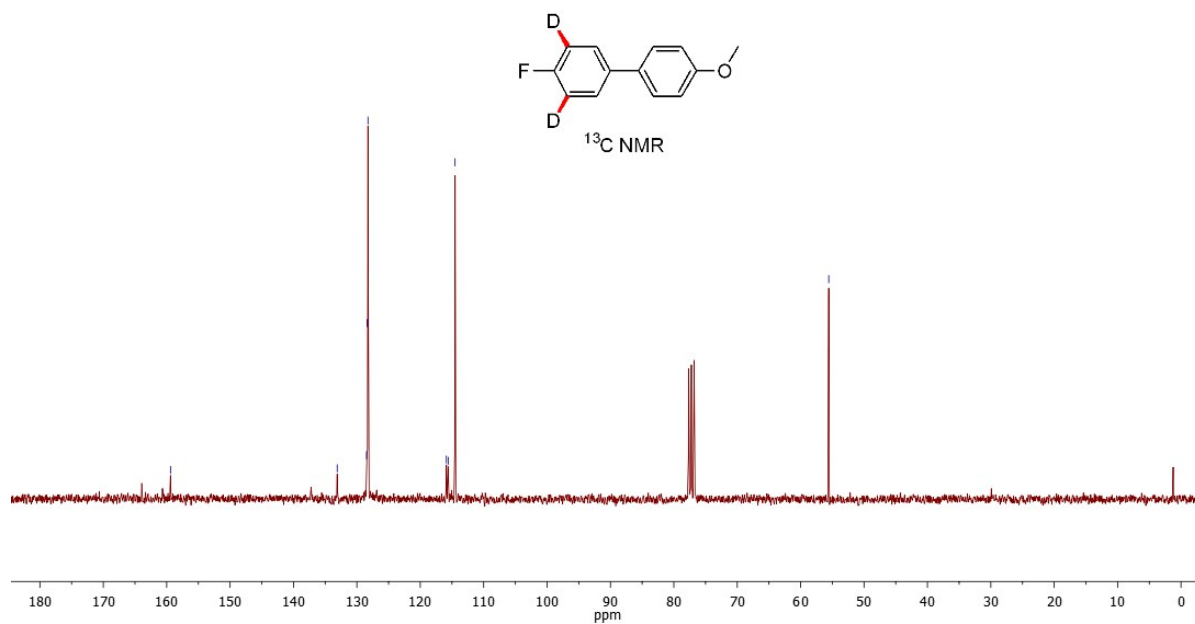

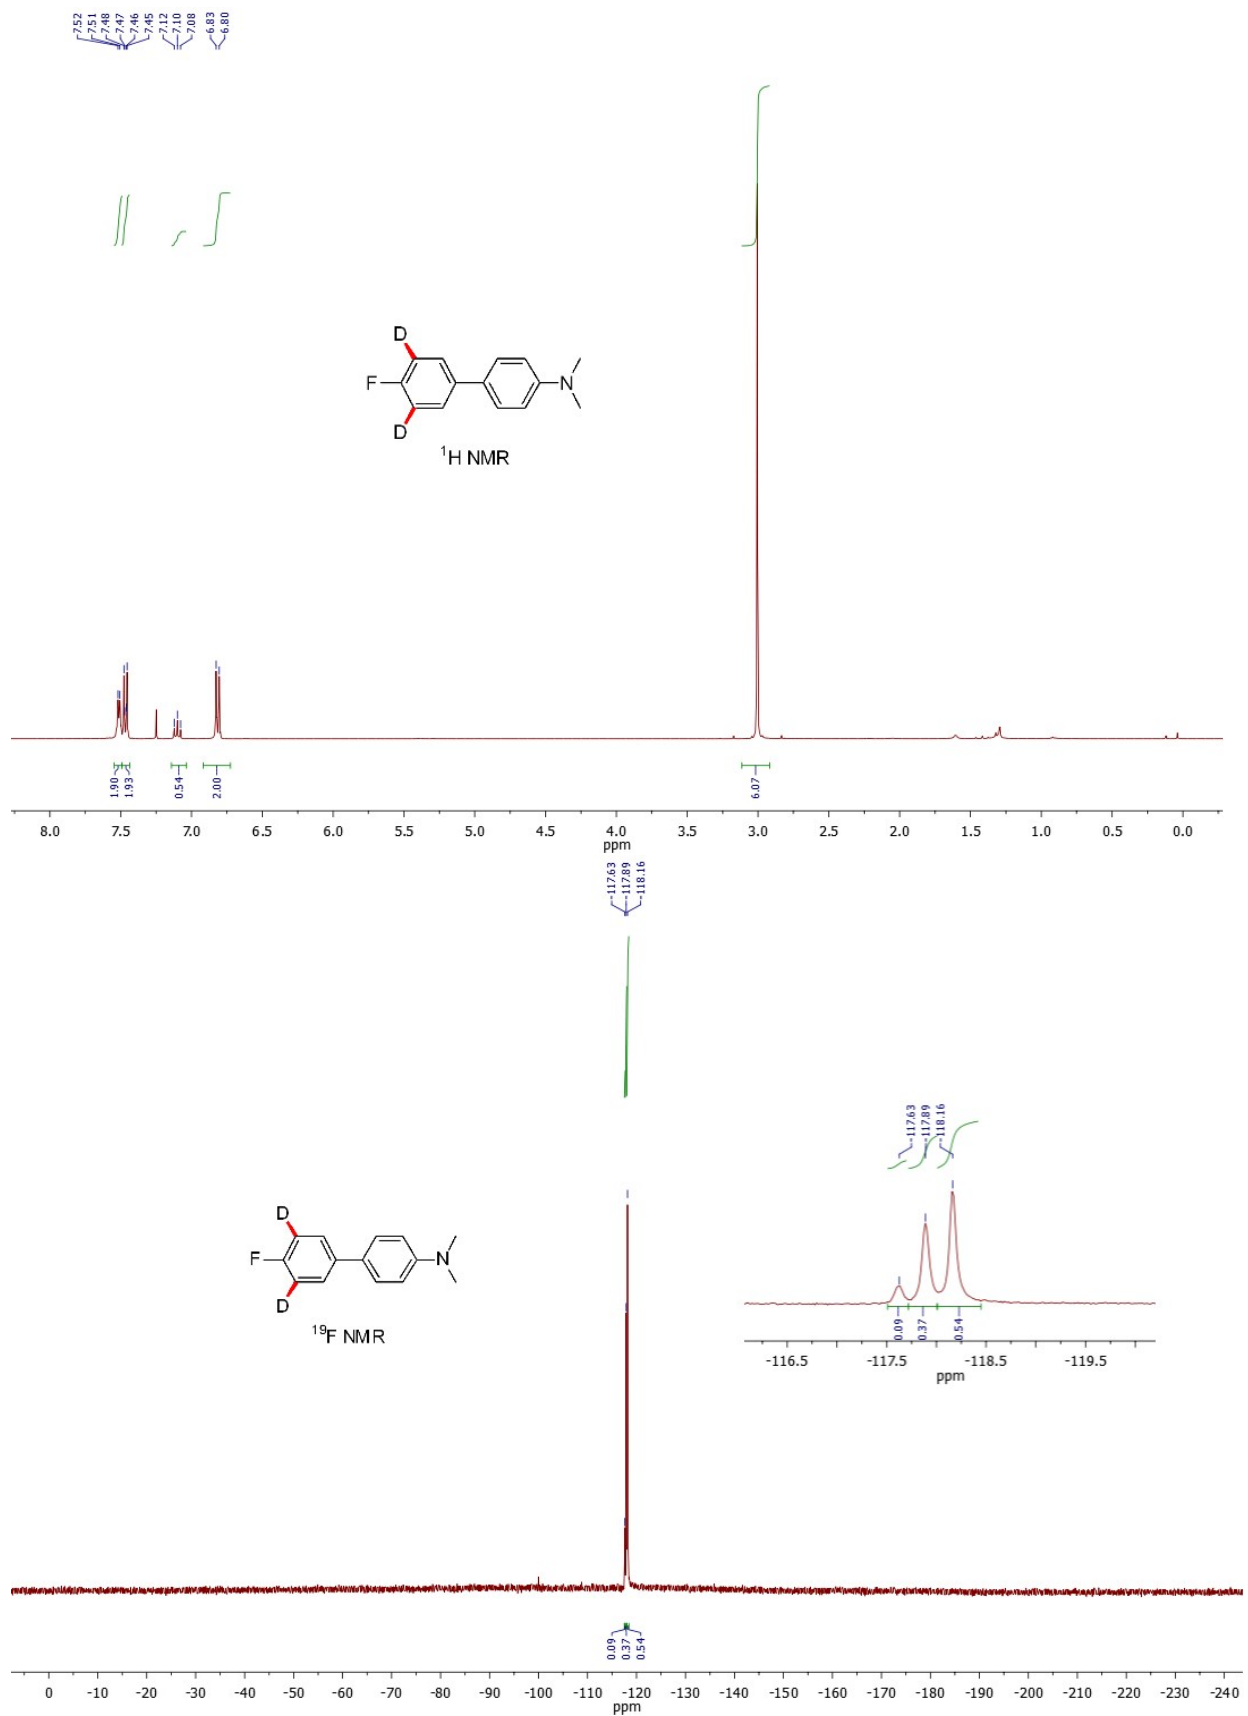

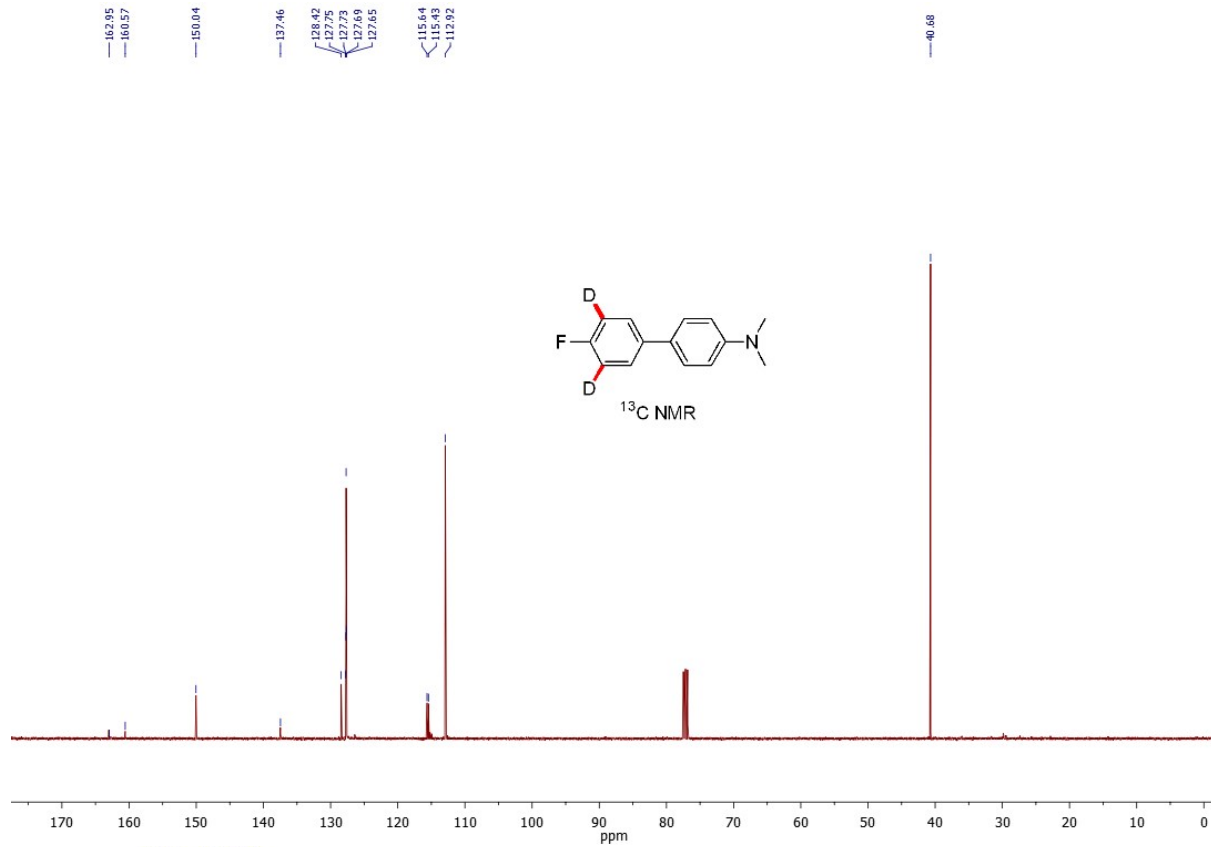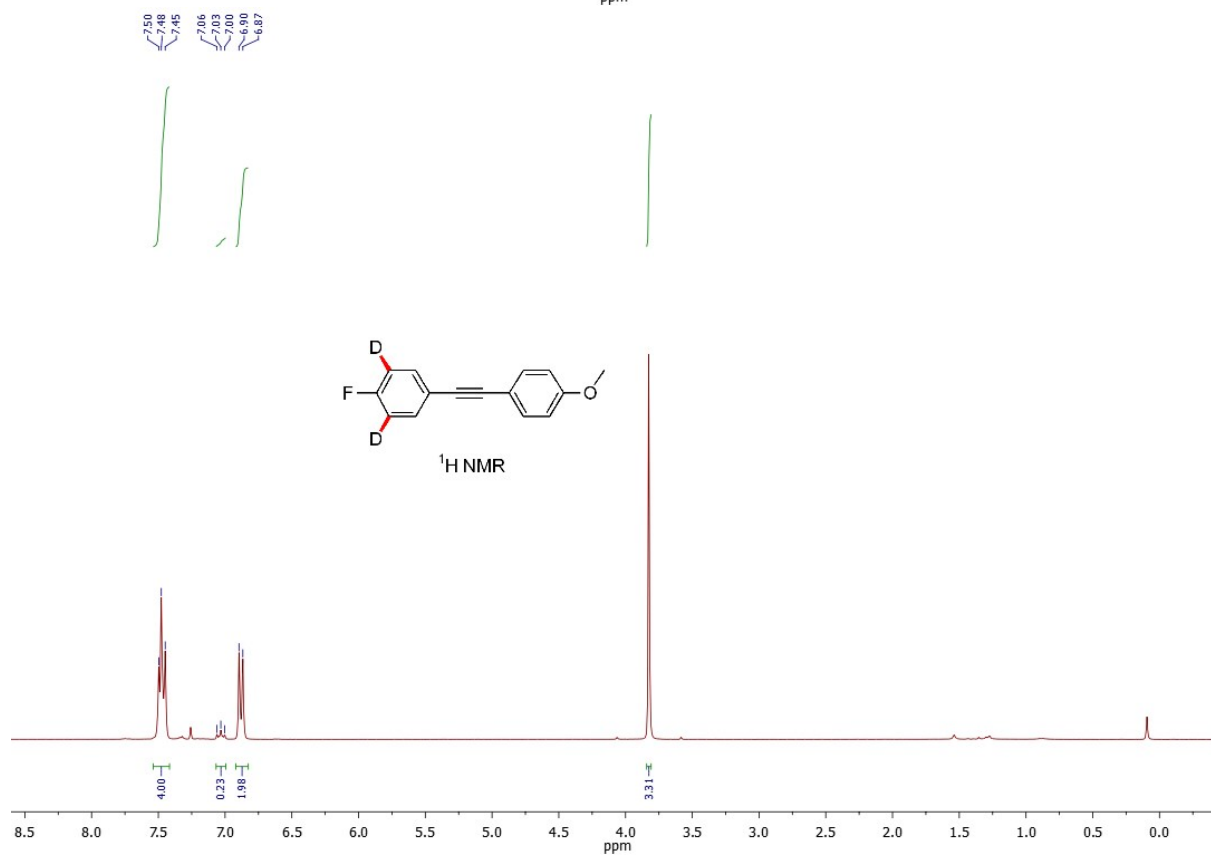

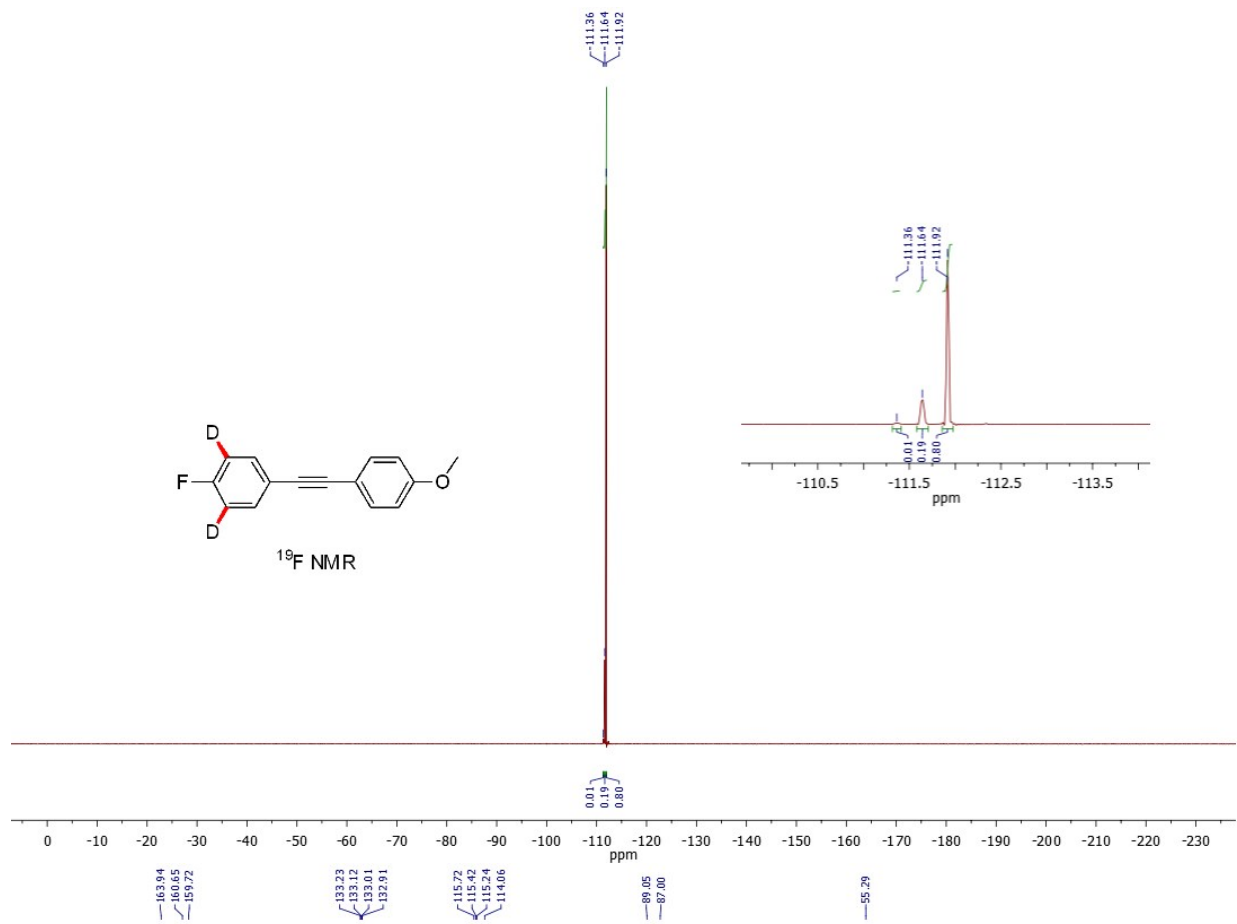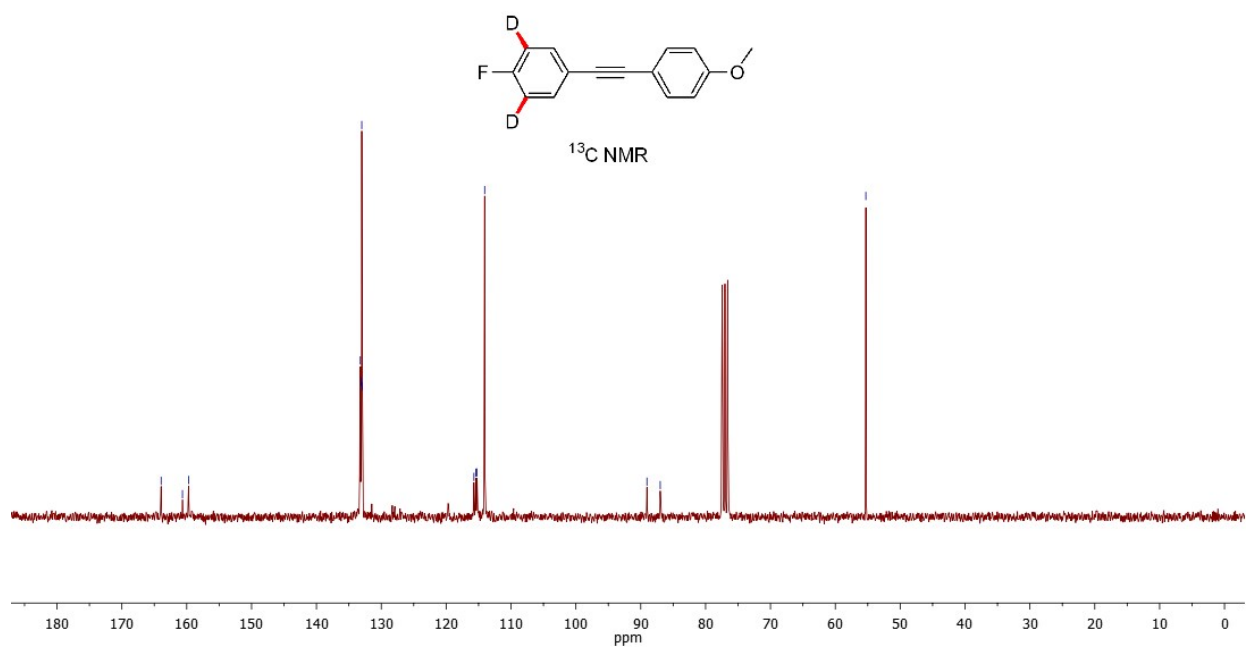



7.61  
7.60  
7.58  
7.48  
7.46  
7.42  
7.39  
7.34  
7.22  
7.08  
7.06

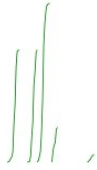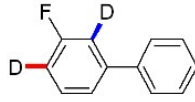

<sup>1</sup>H NMR

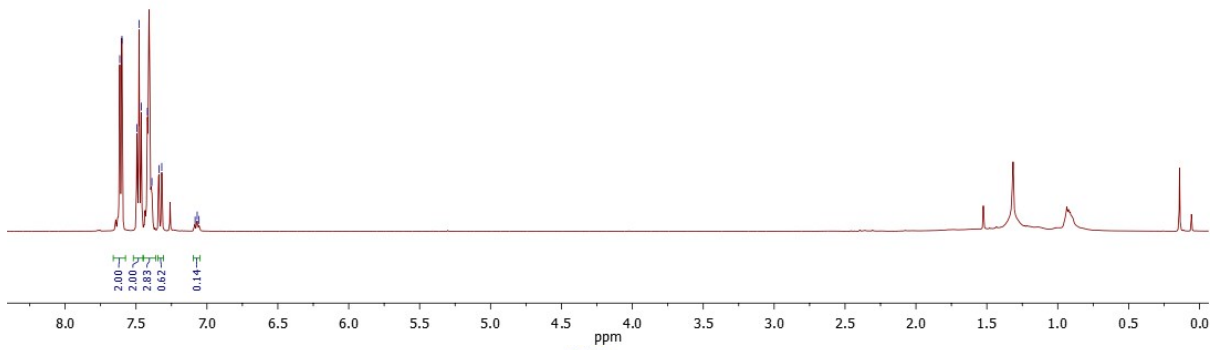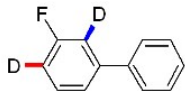

<sup>19</sup>F NMR

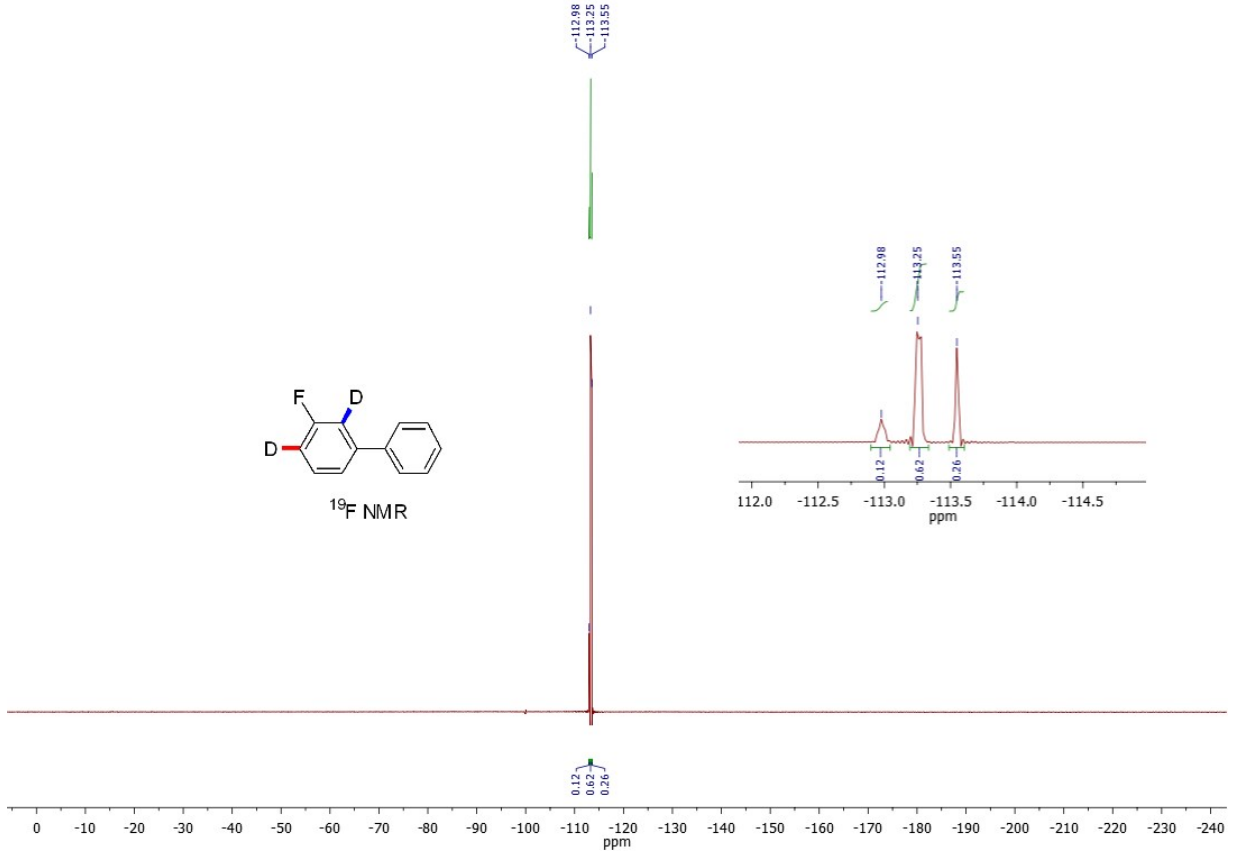

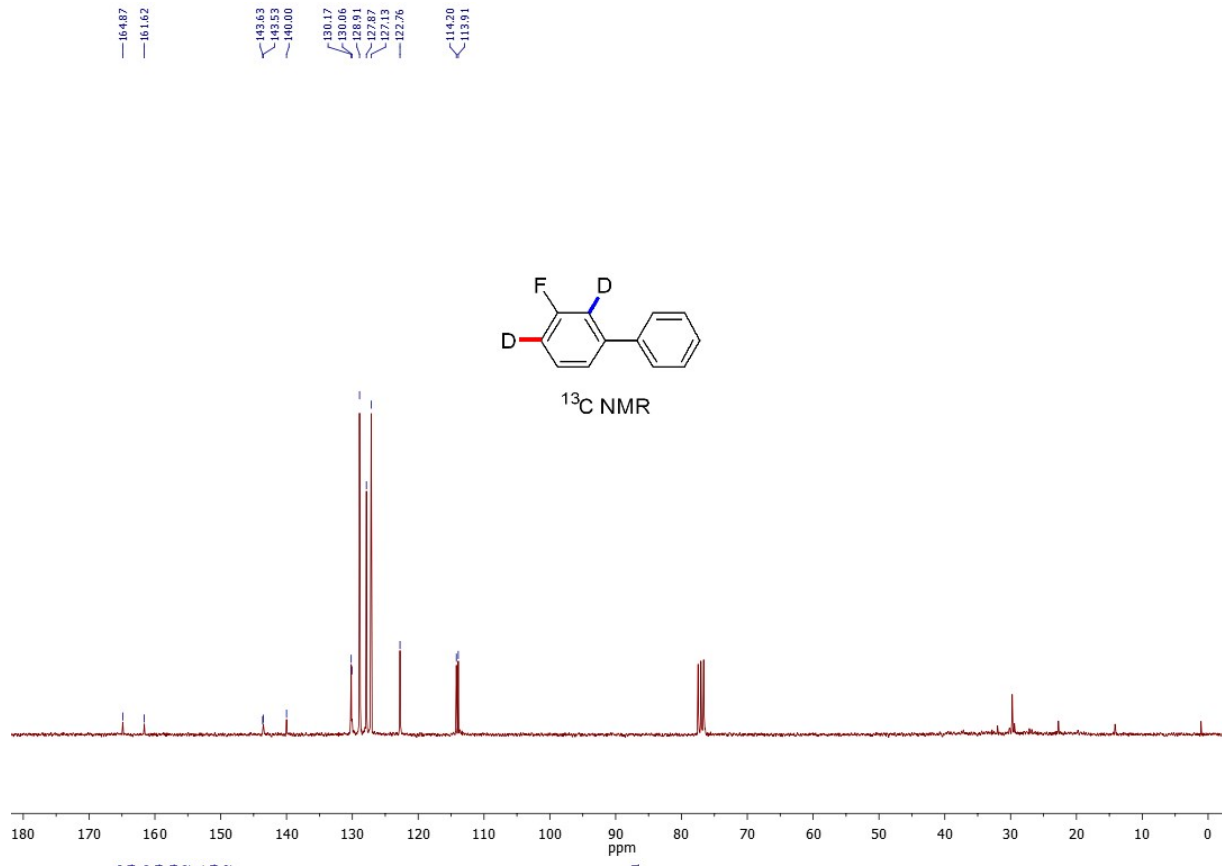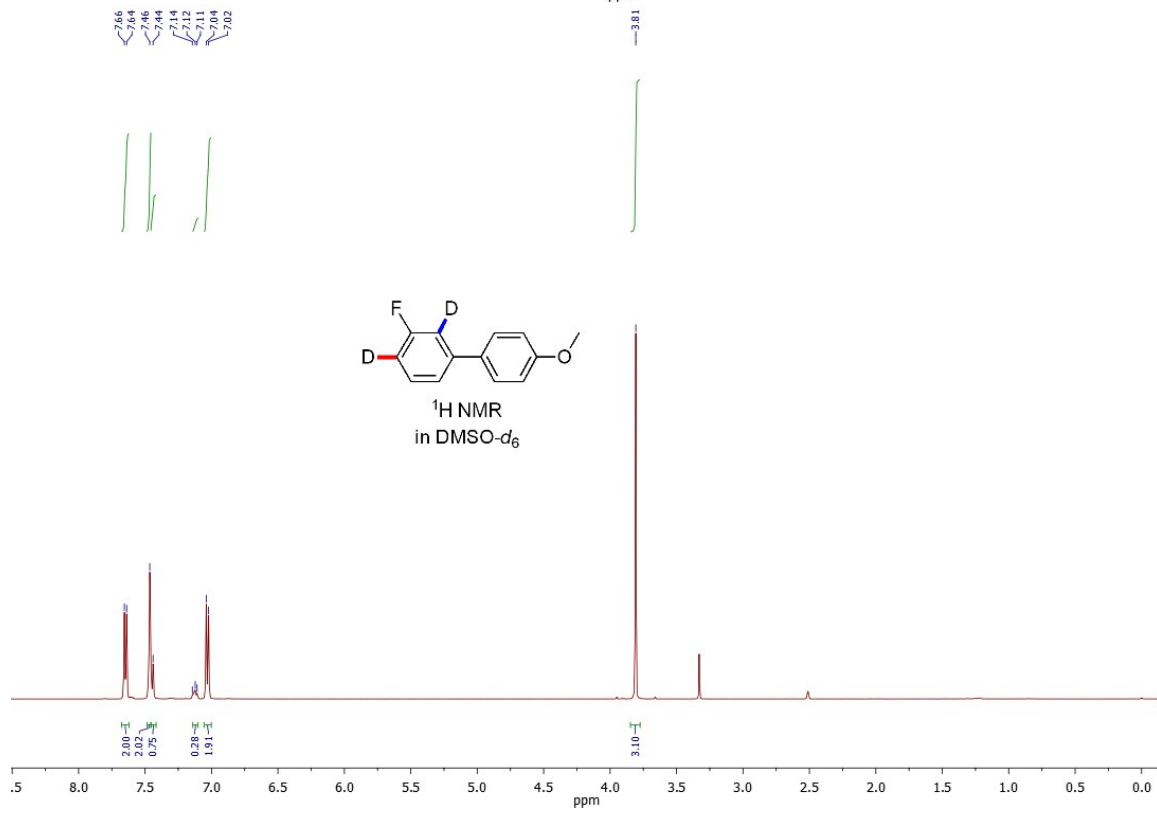

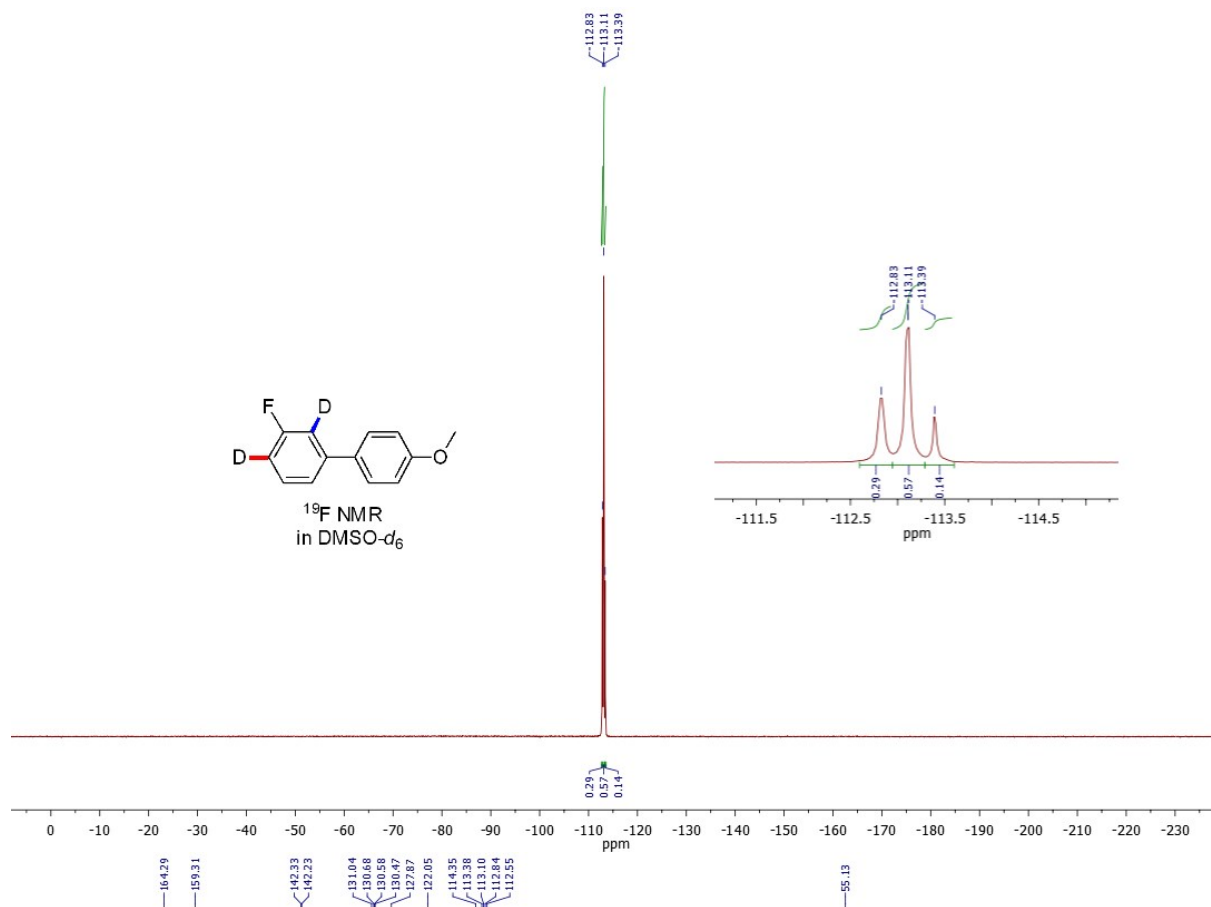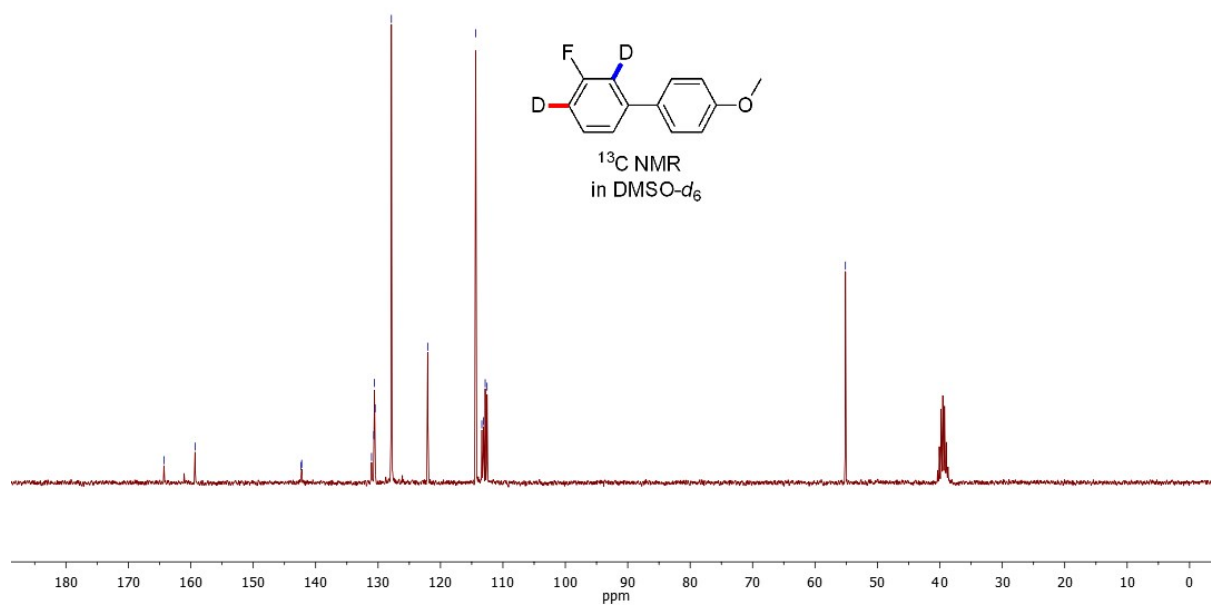

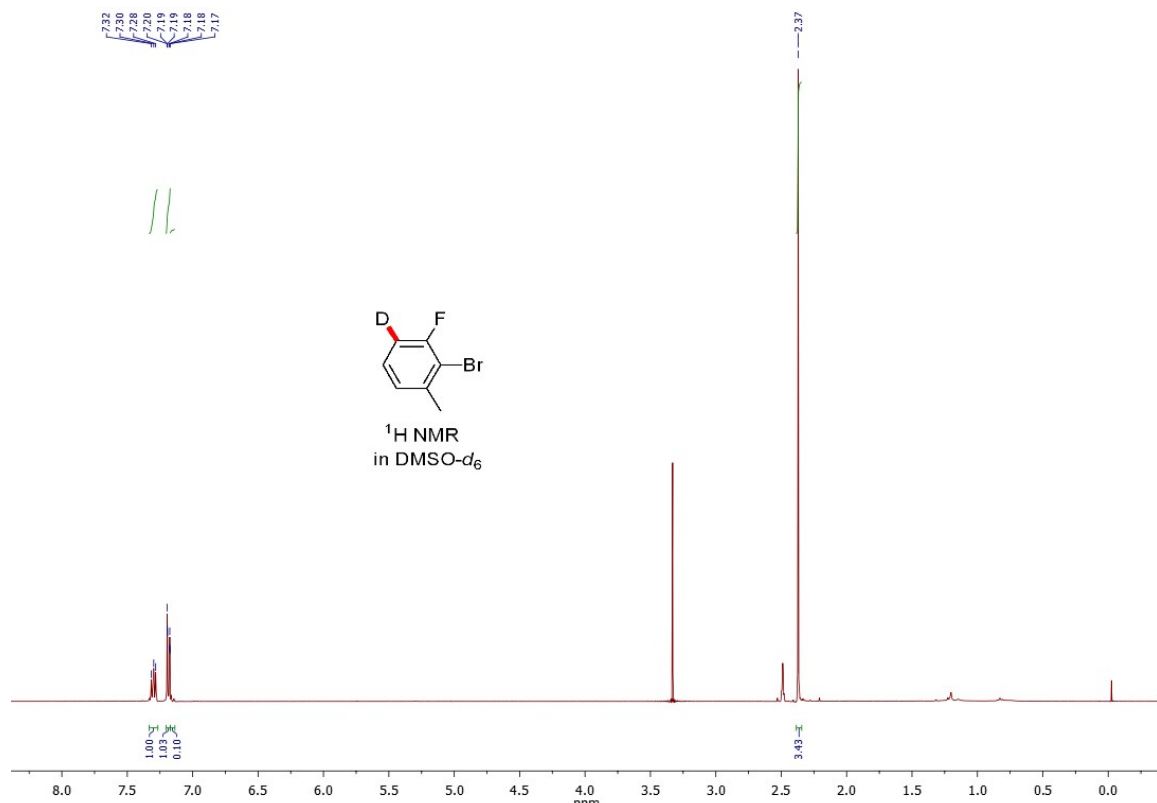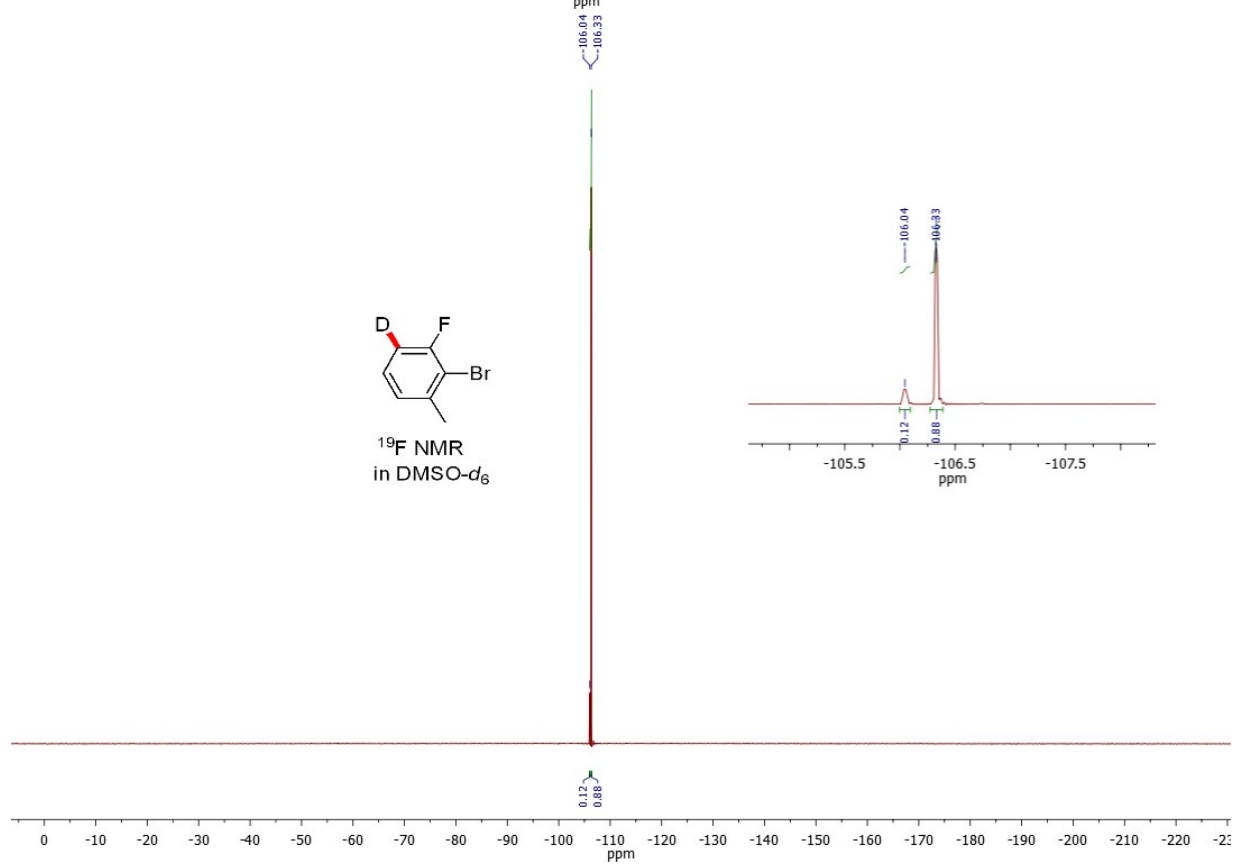

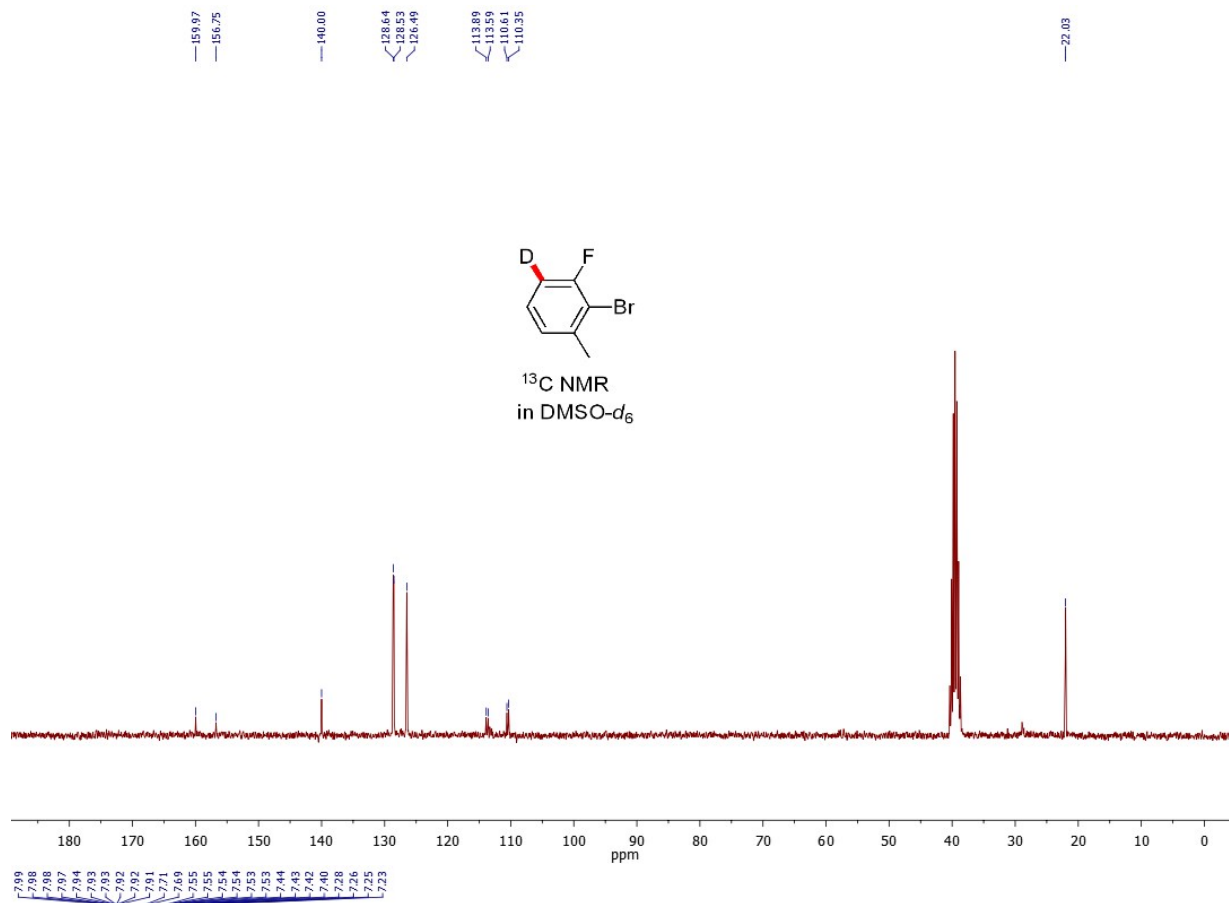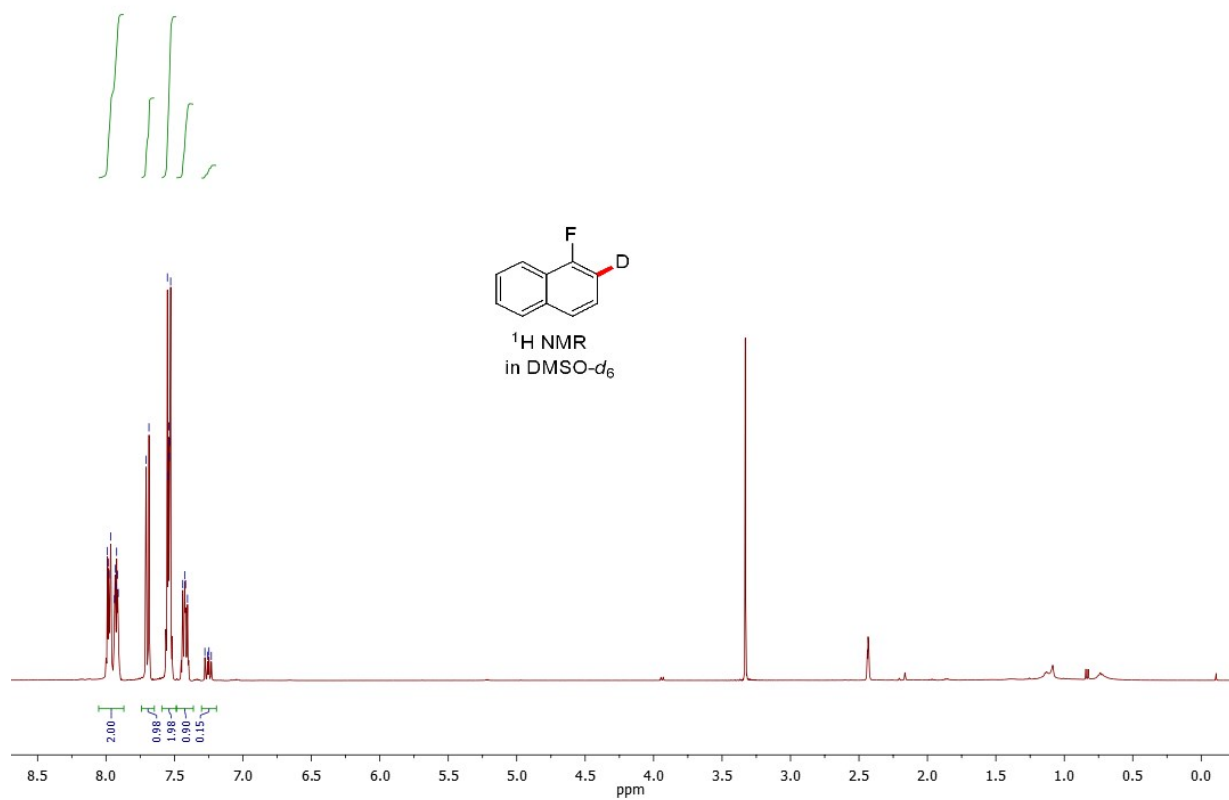

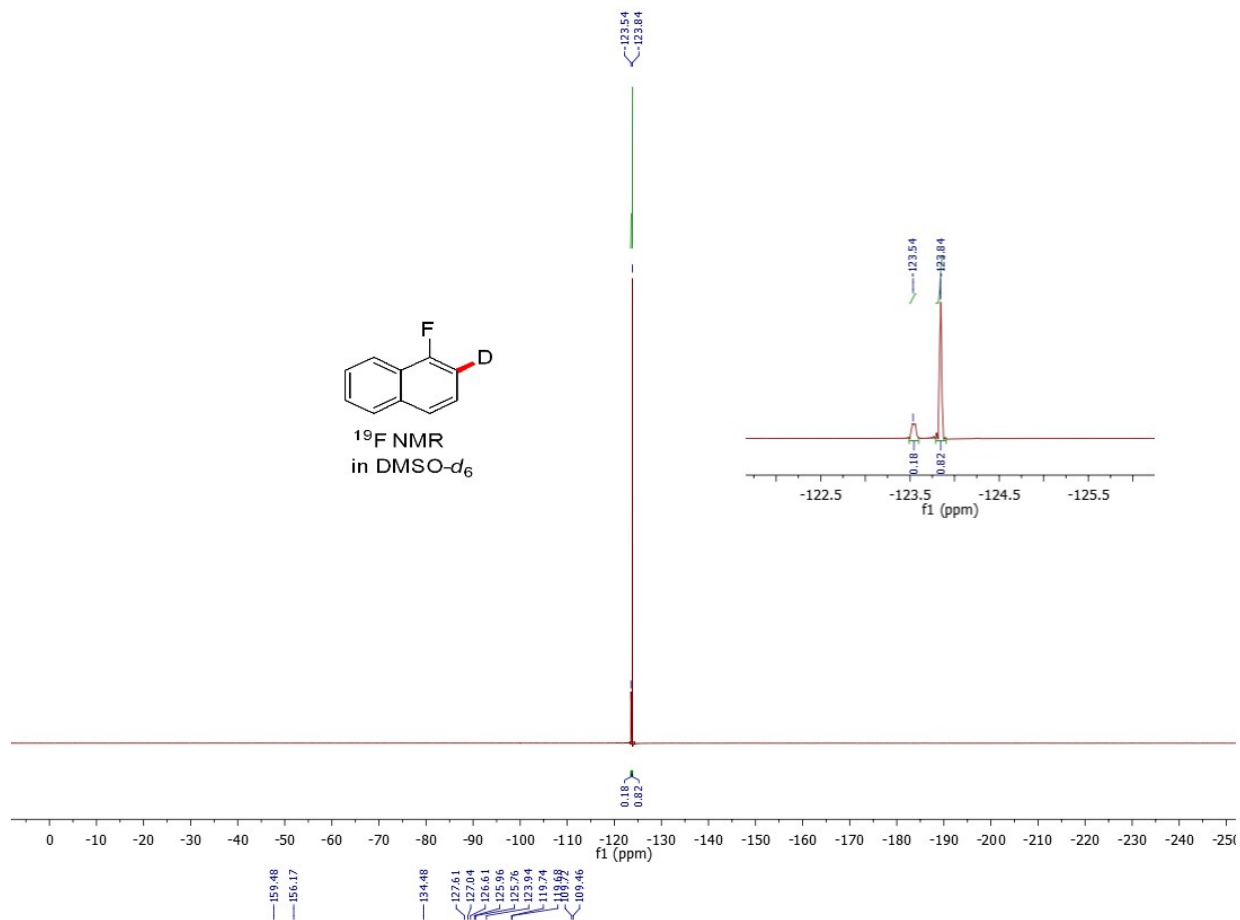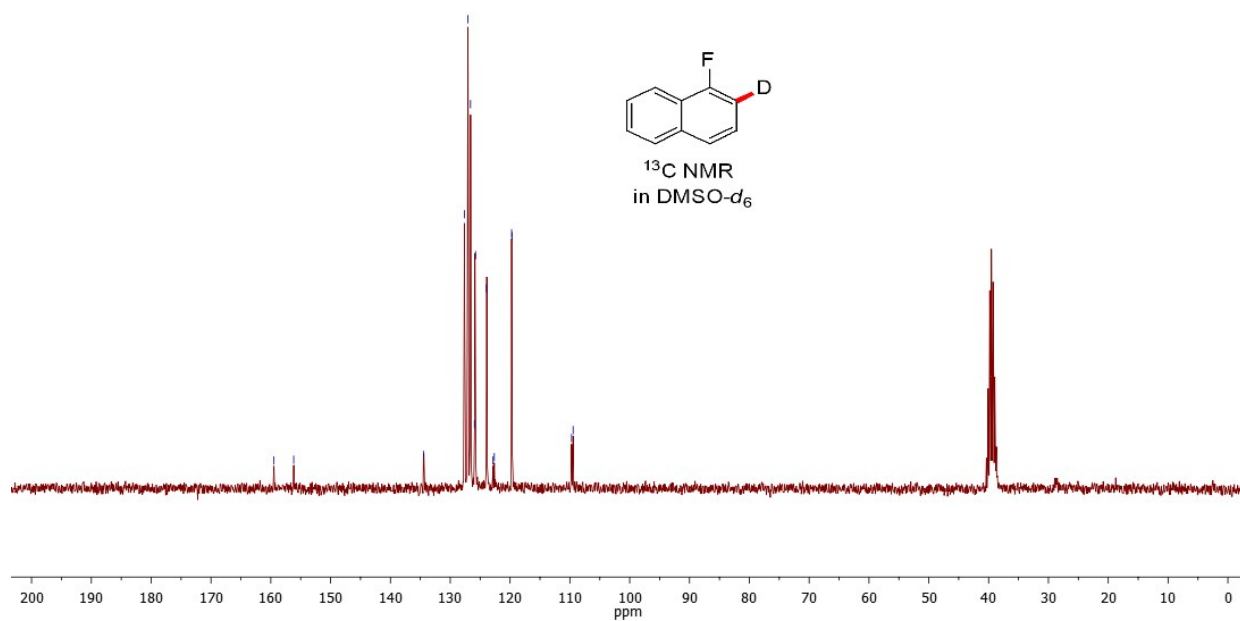

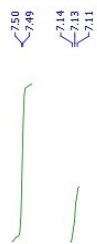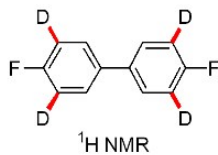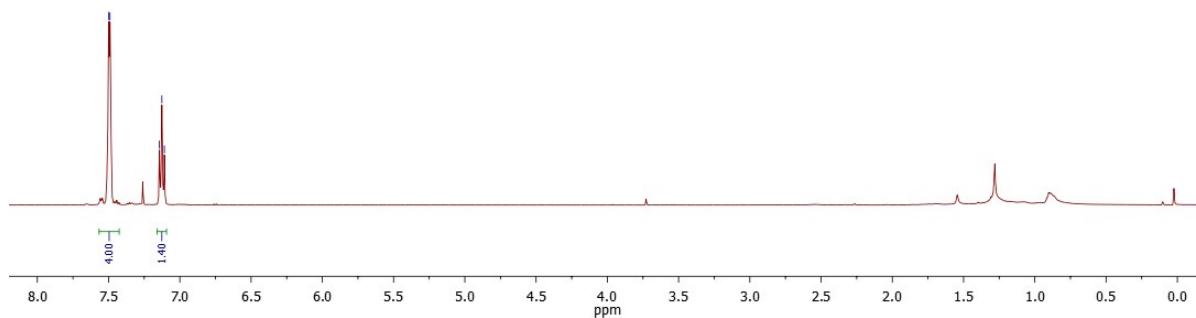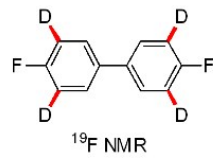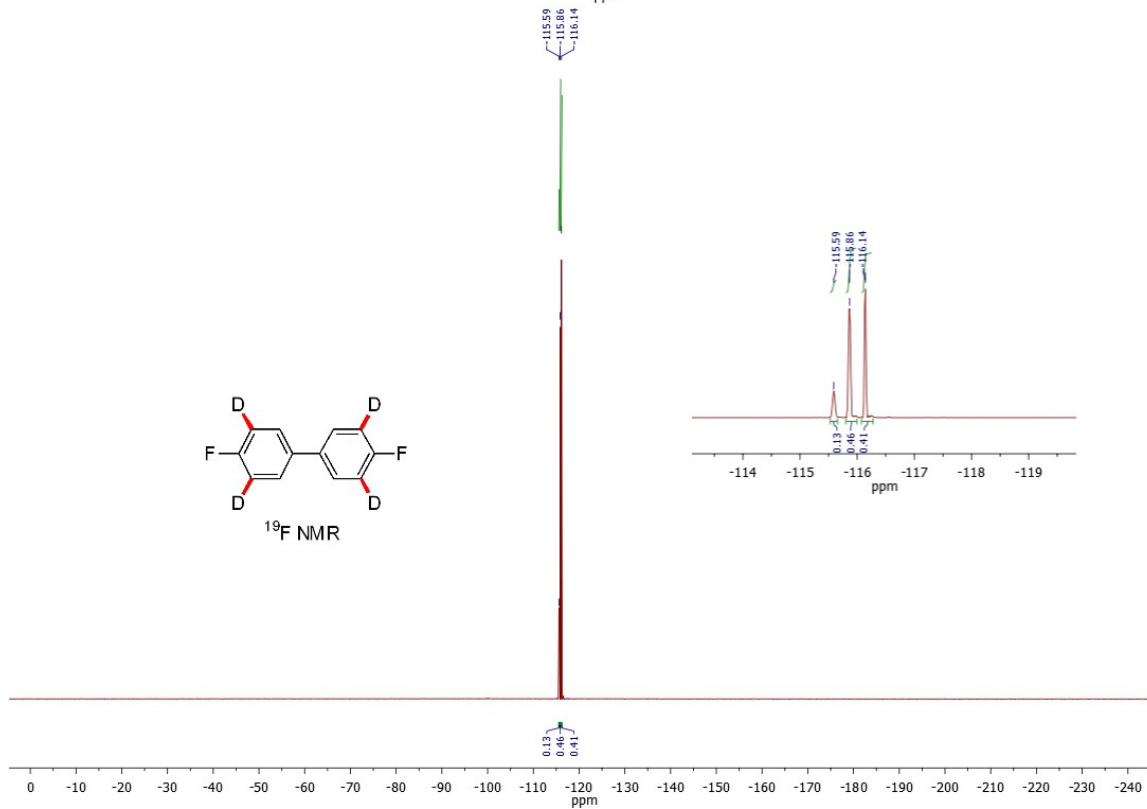

164.06  
160.80  
136.40  
128.62  
128.74  
115.82  
115.54

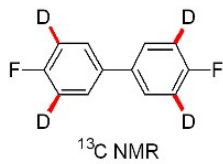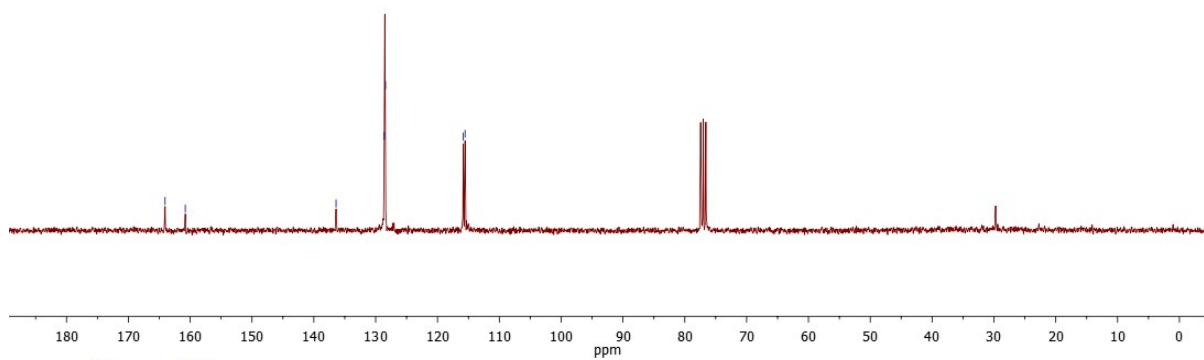

7.82  
7.81  
7.20  
7.17  
7.14

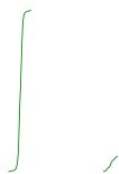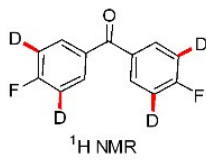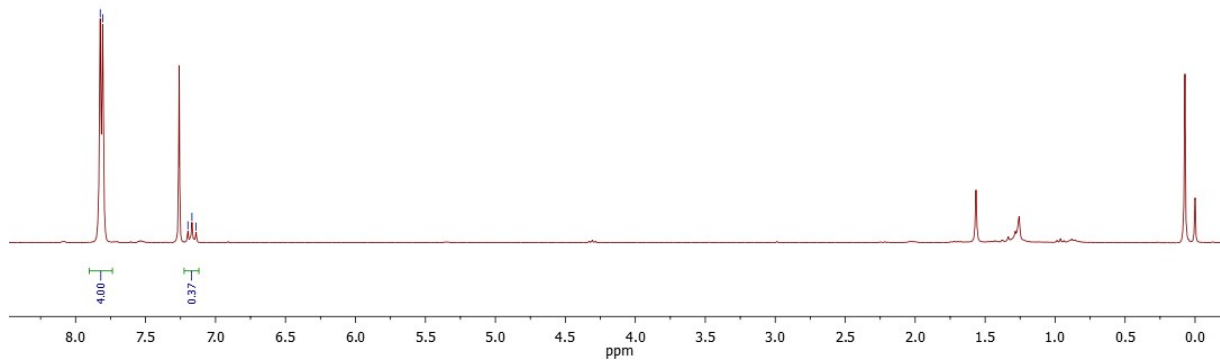



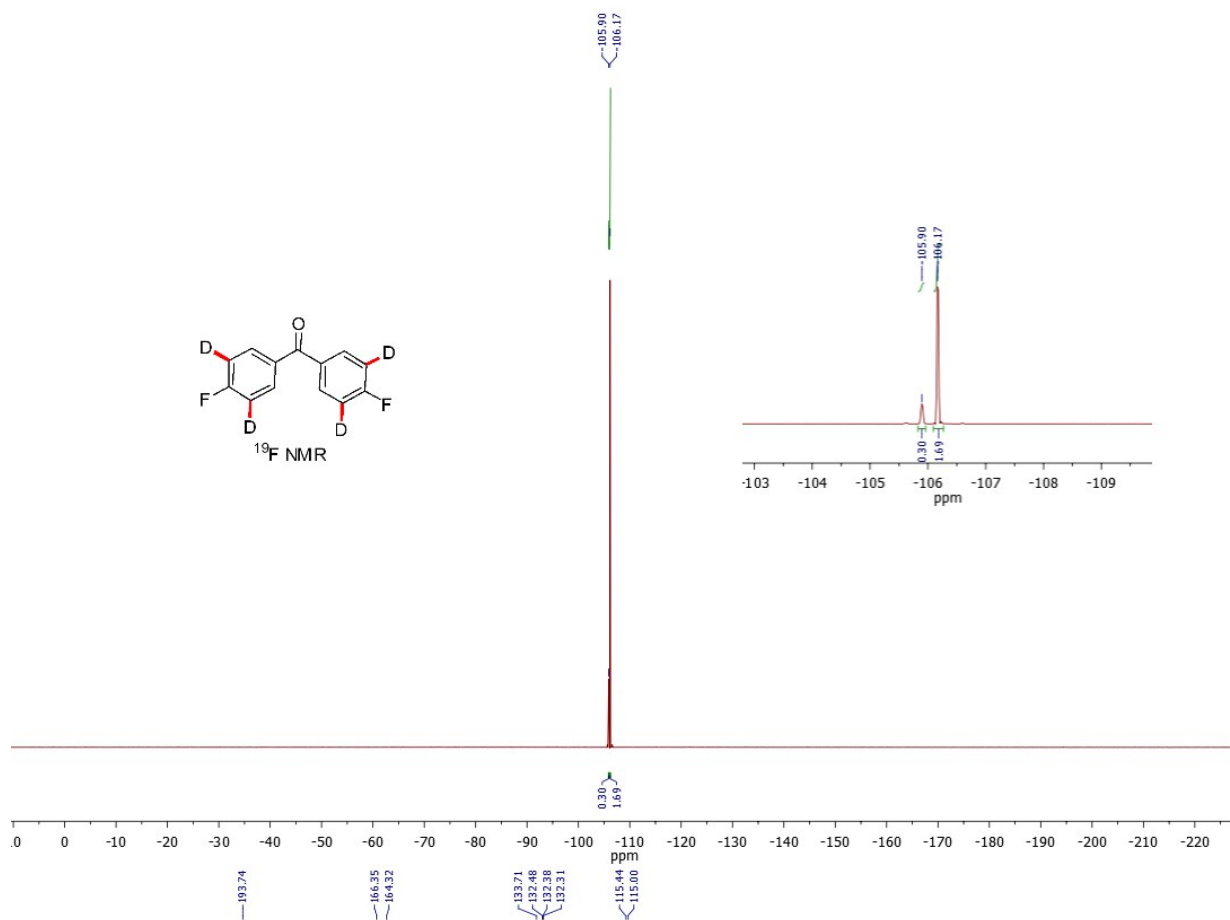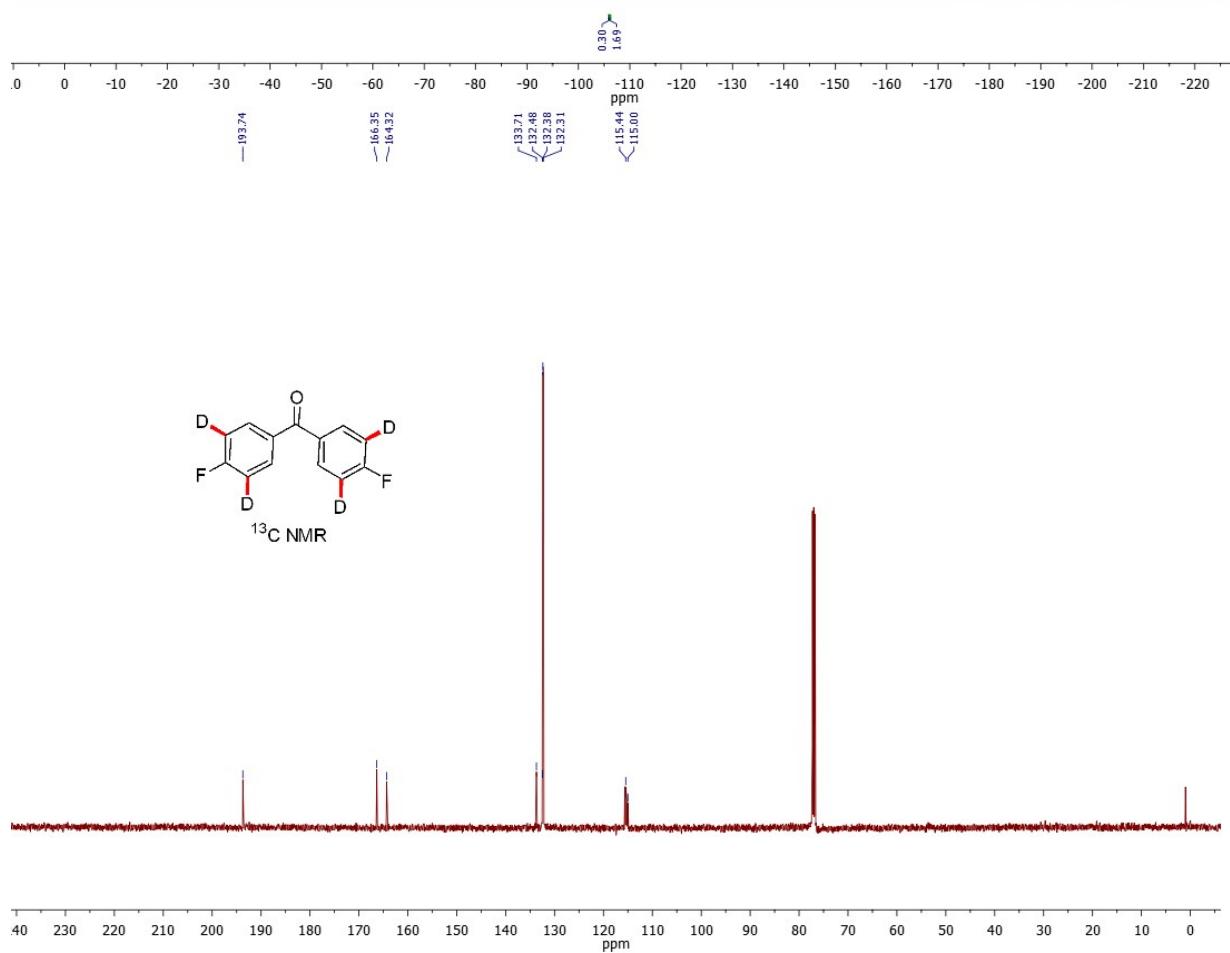

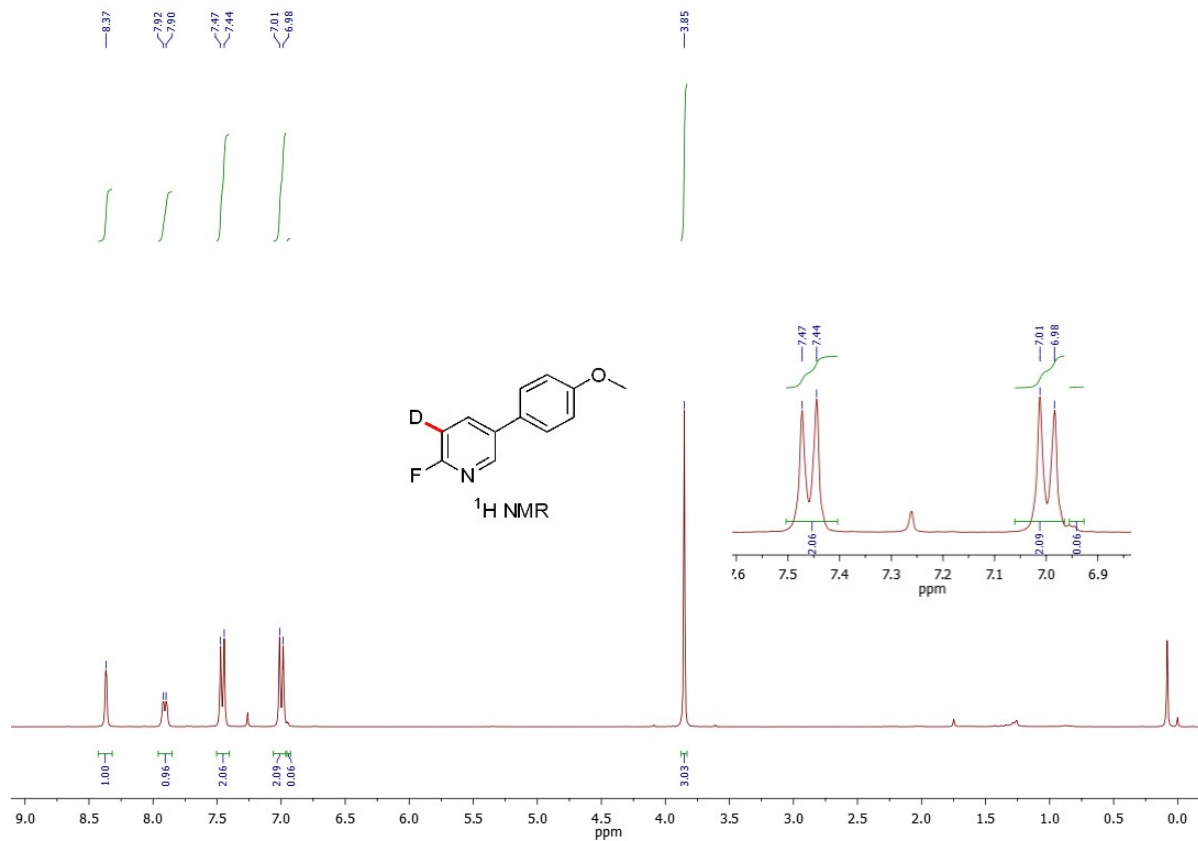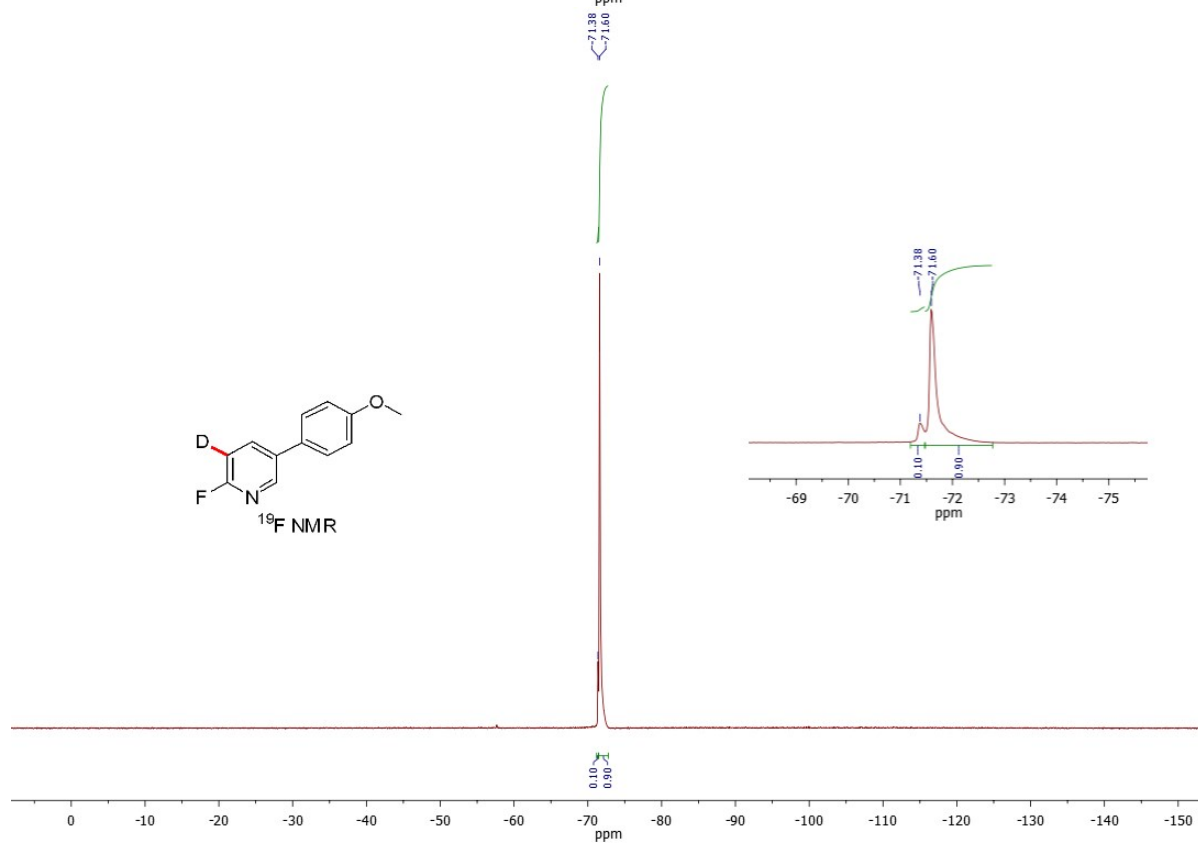

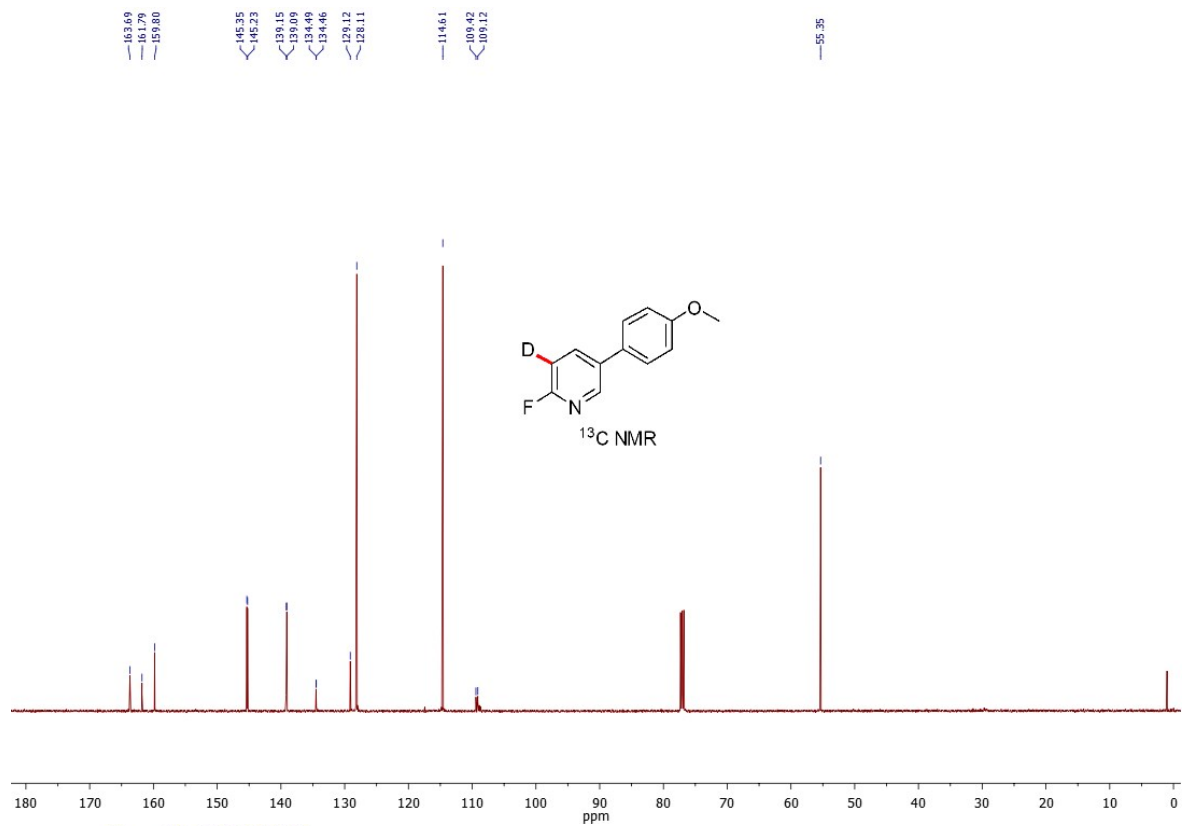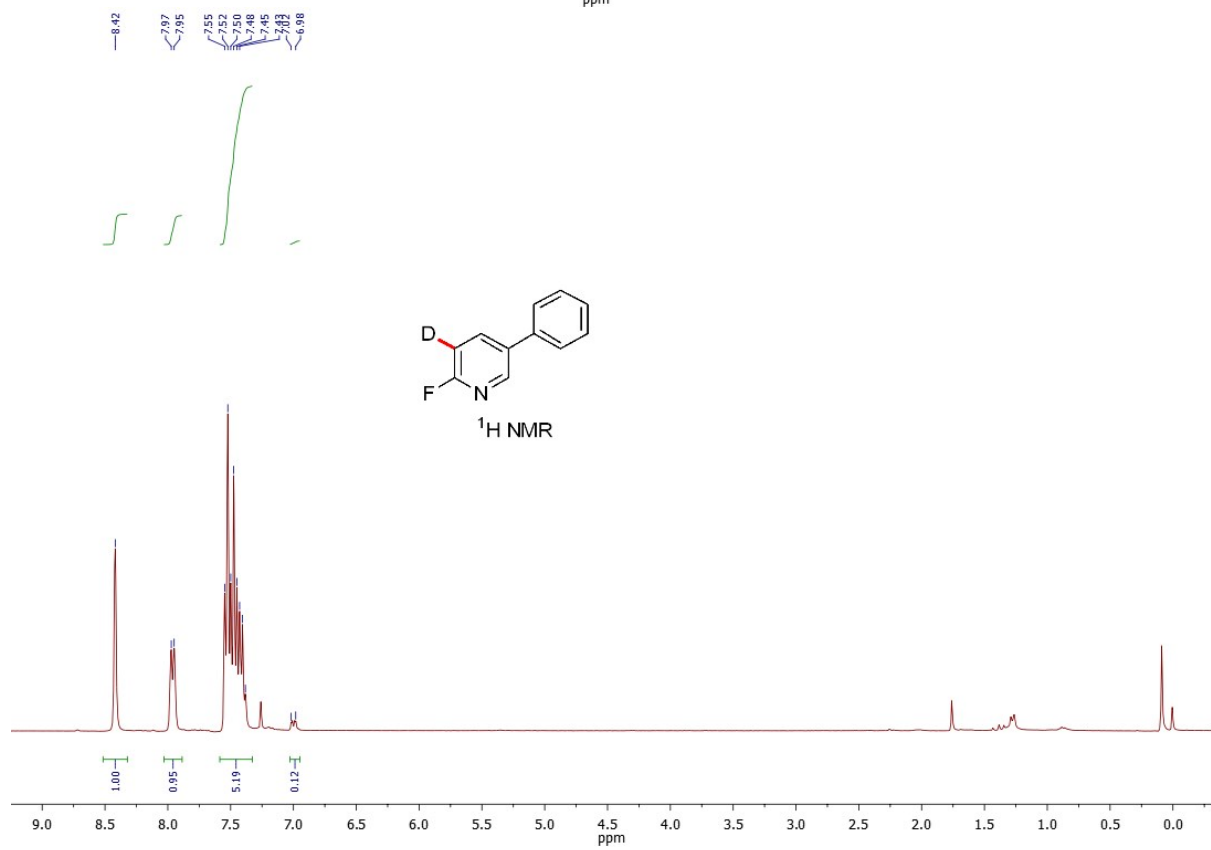

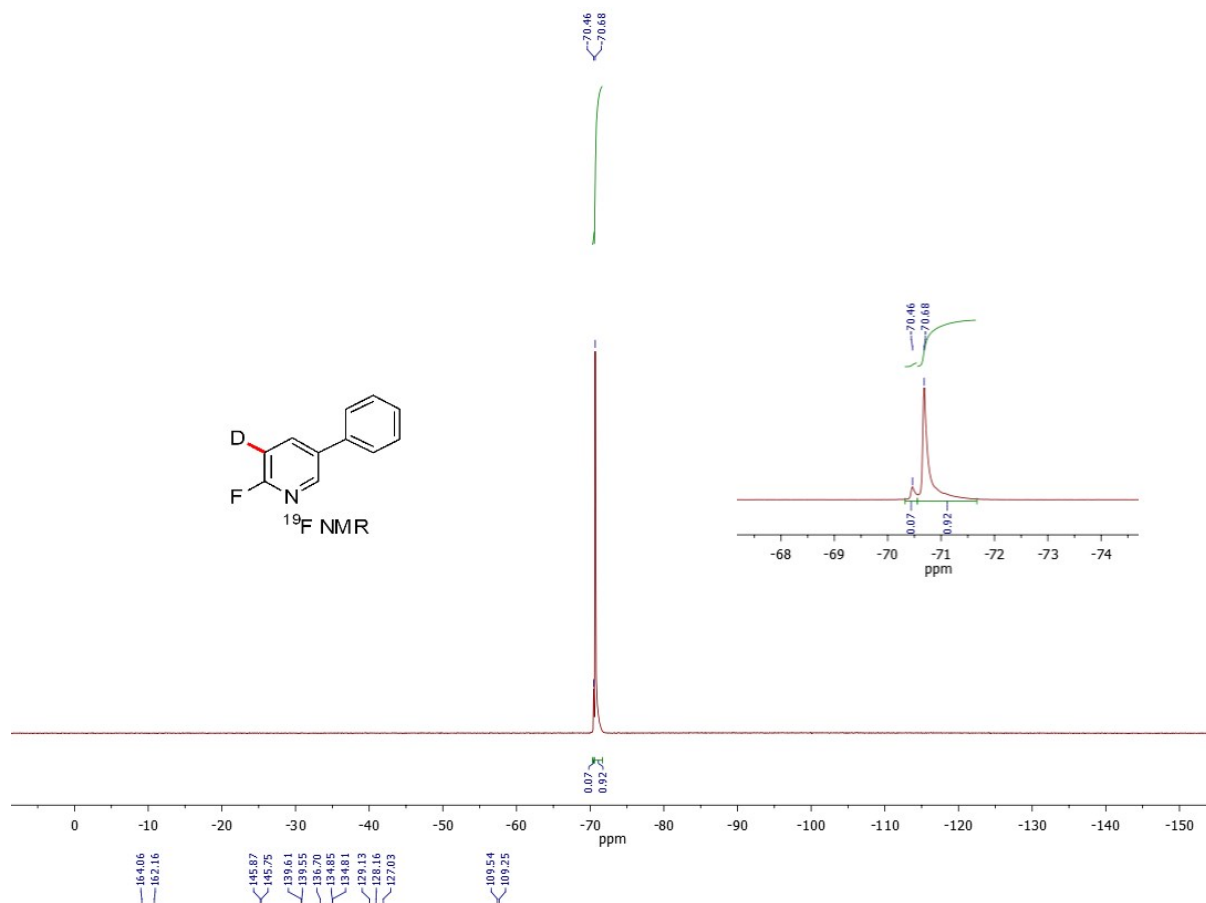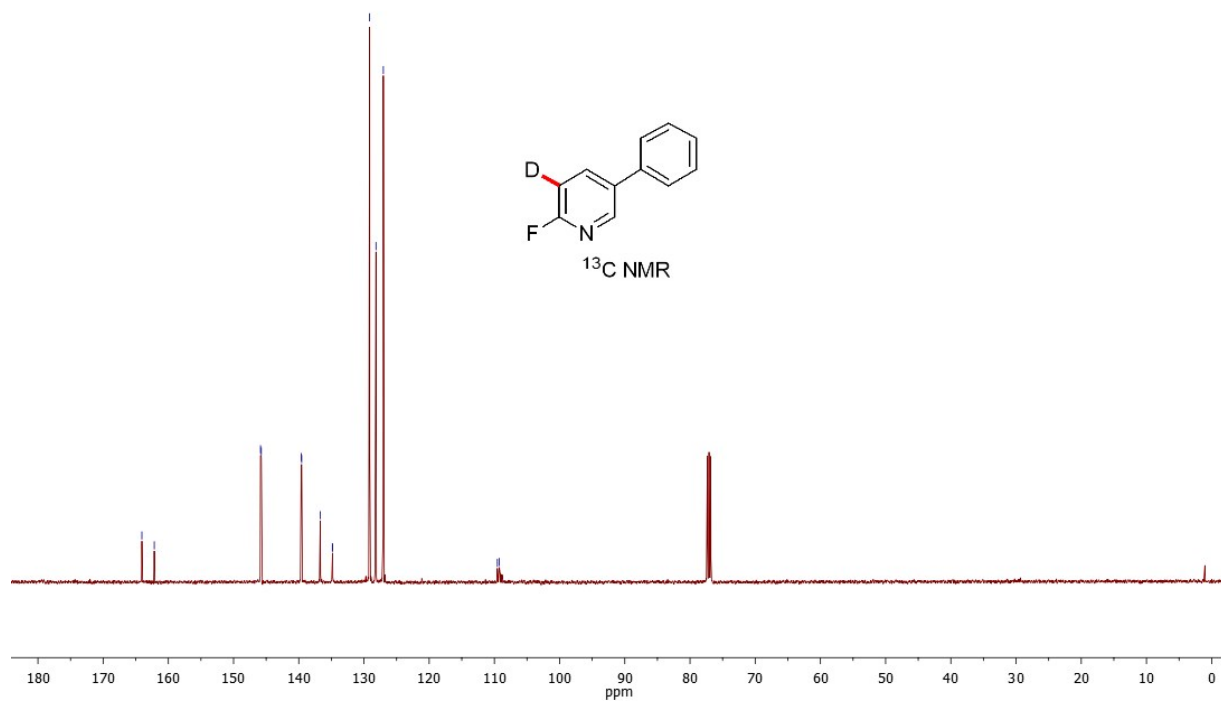

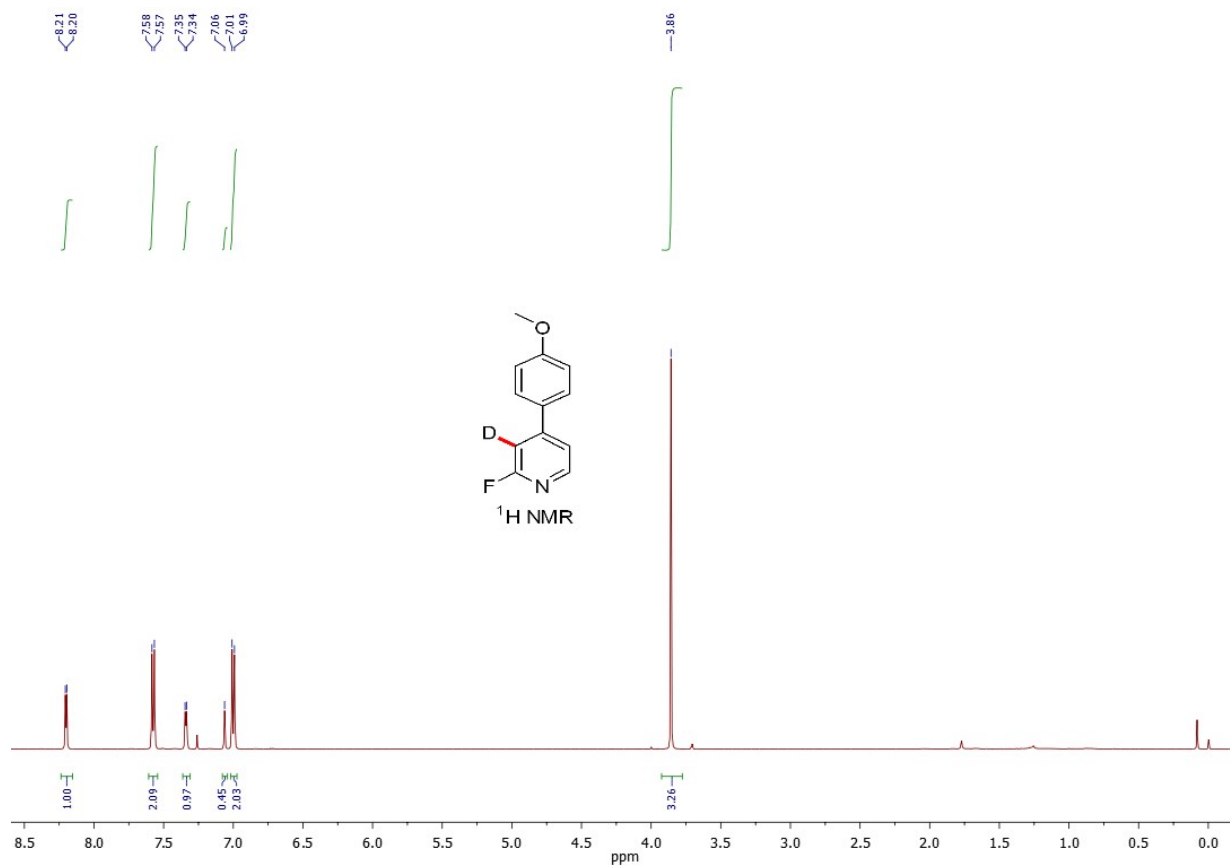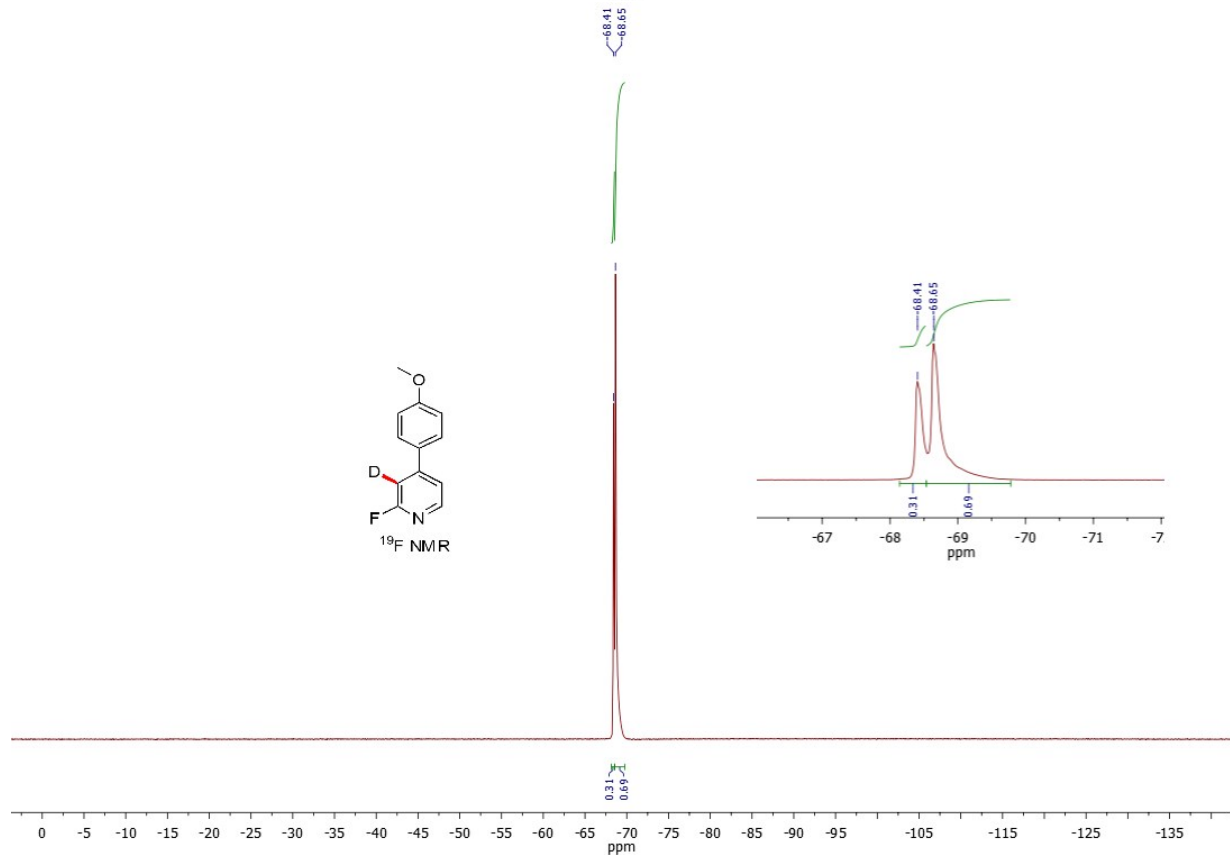

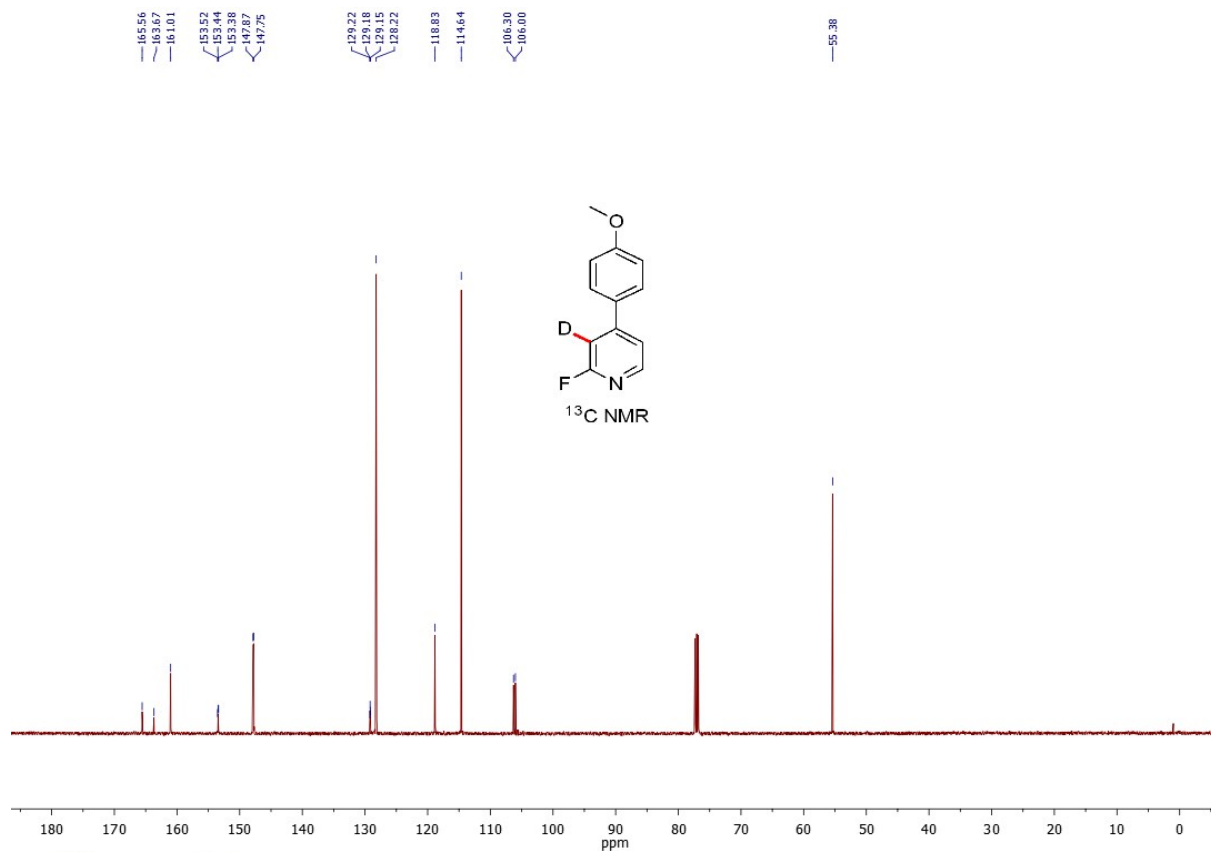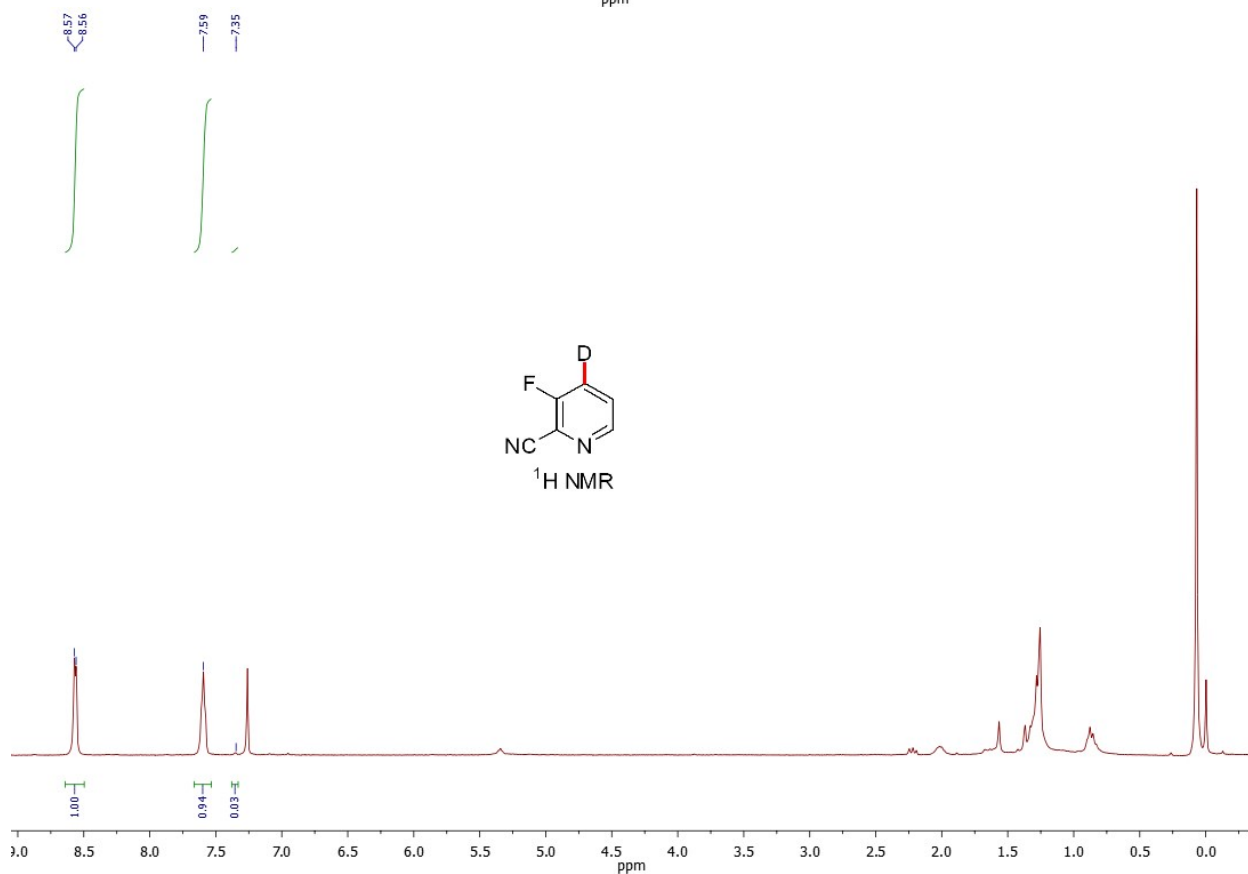

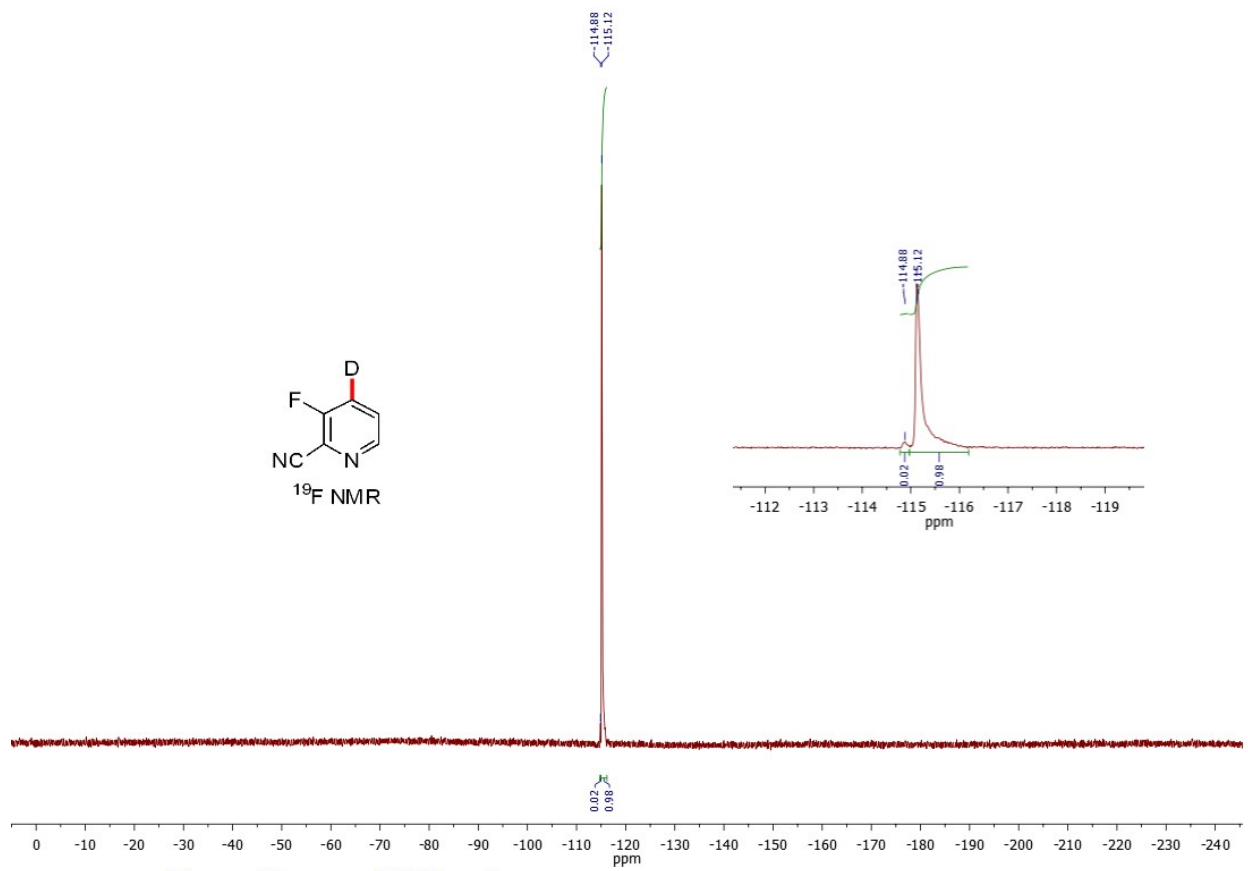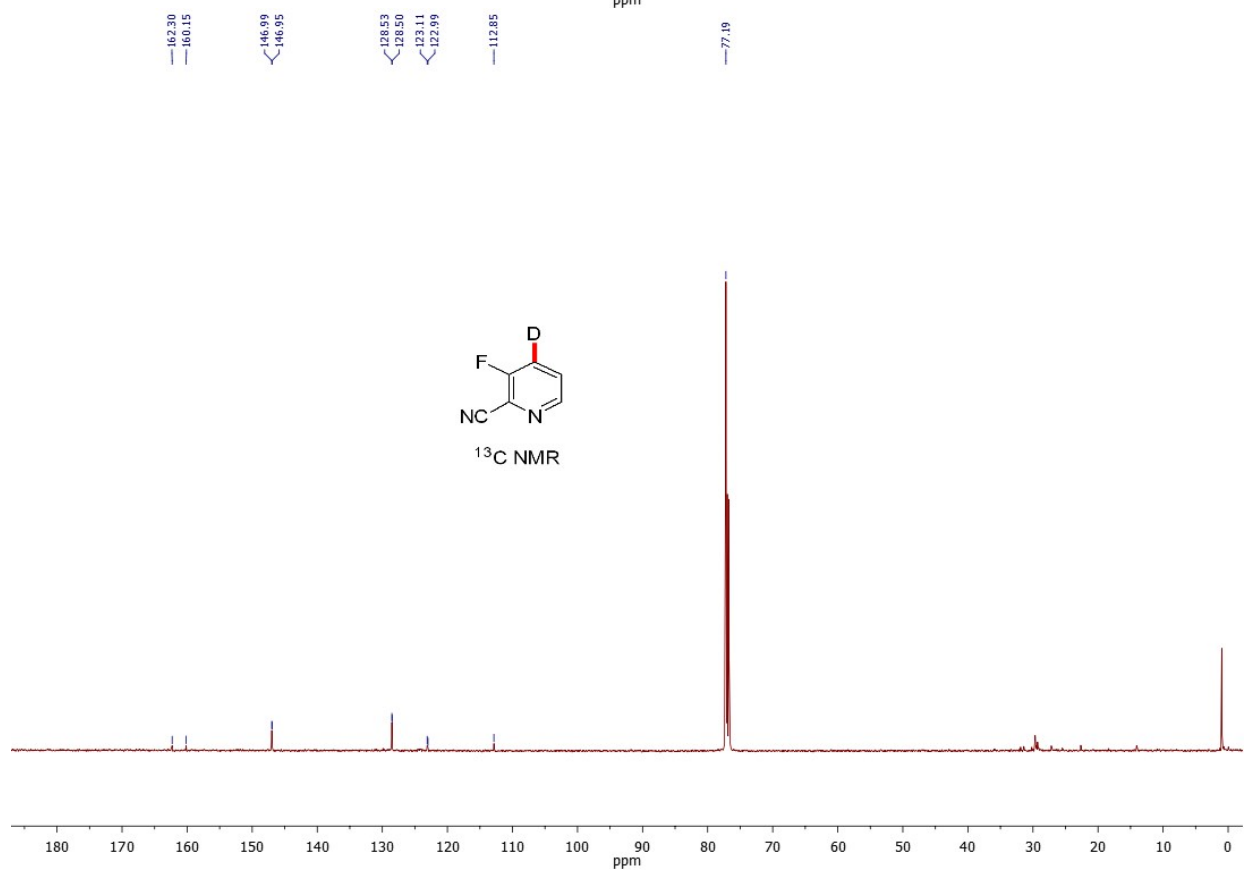

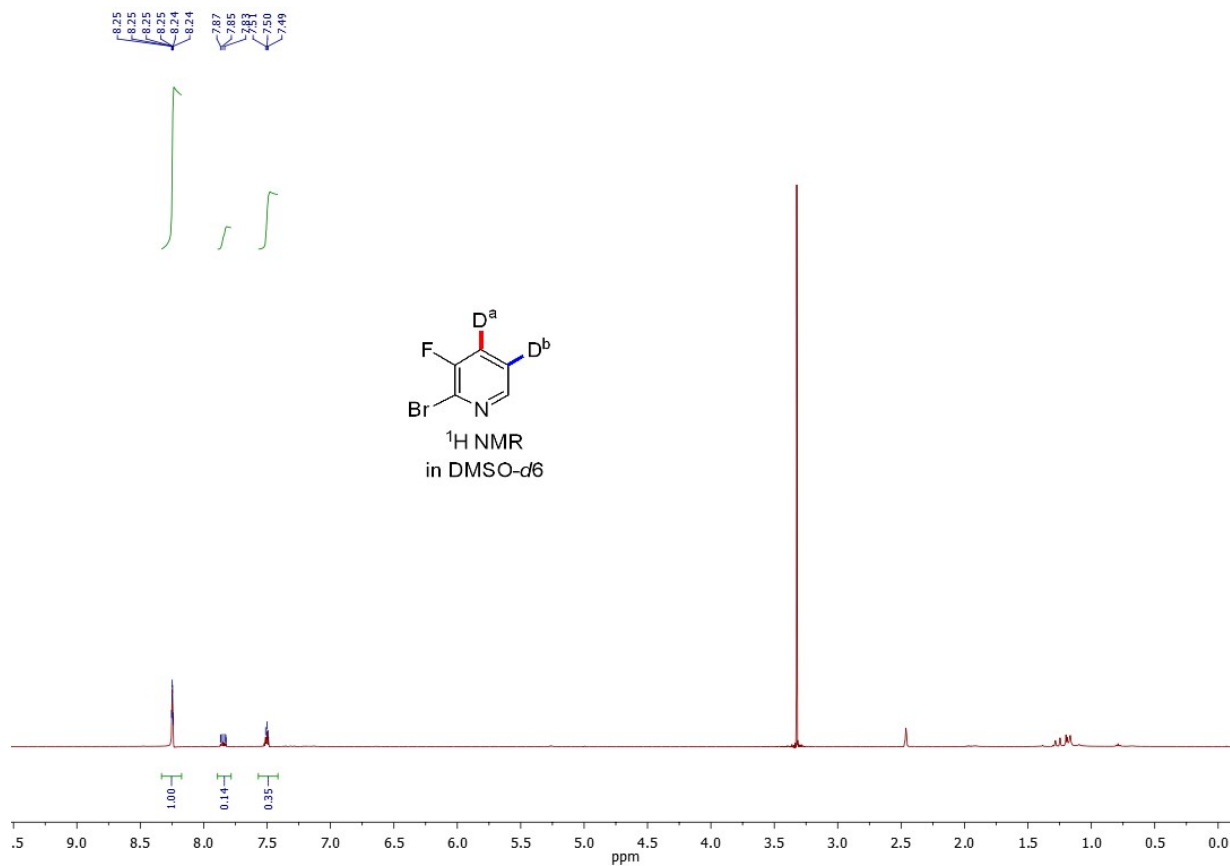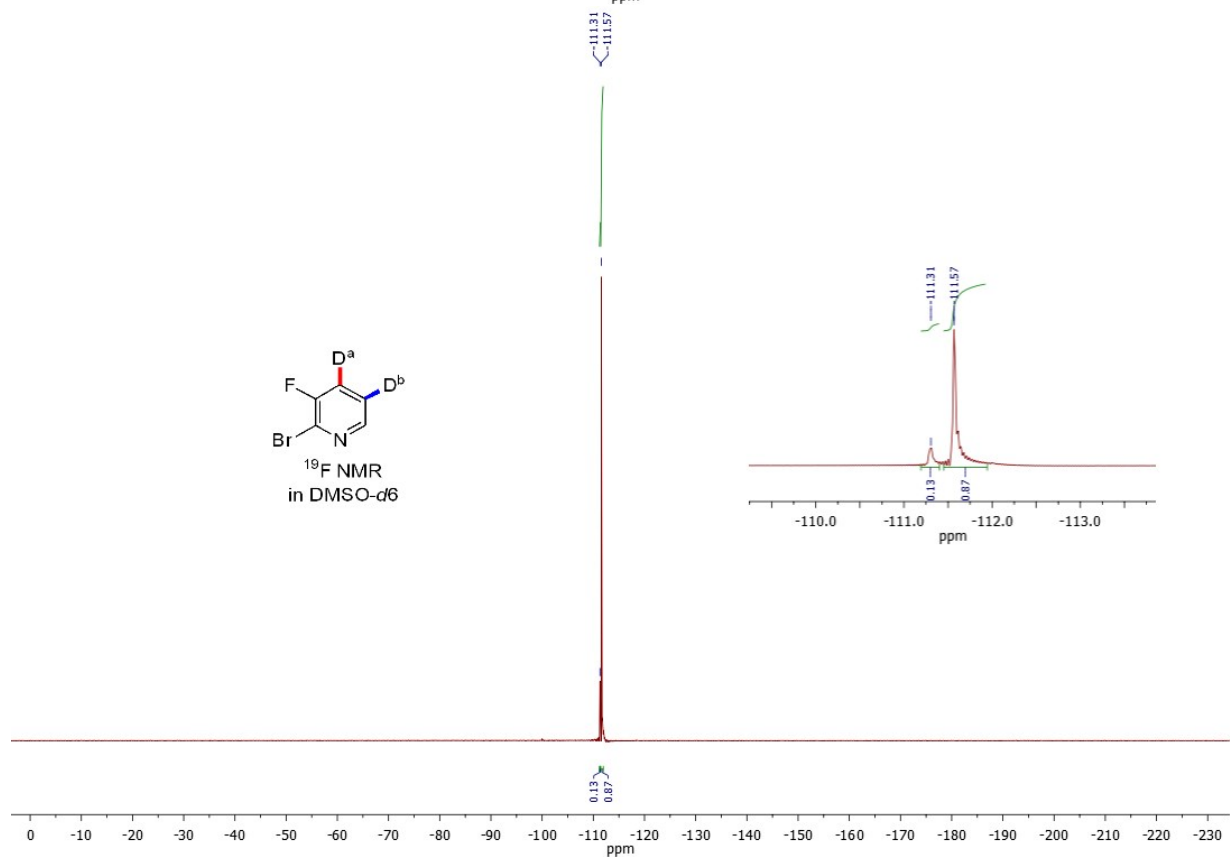



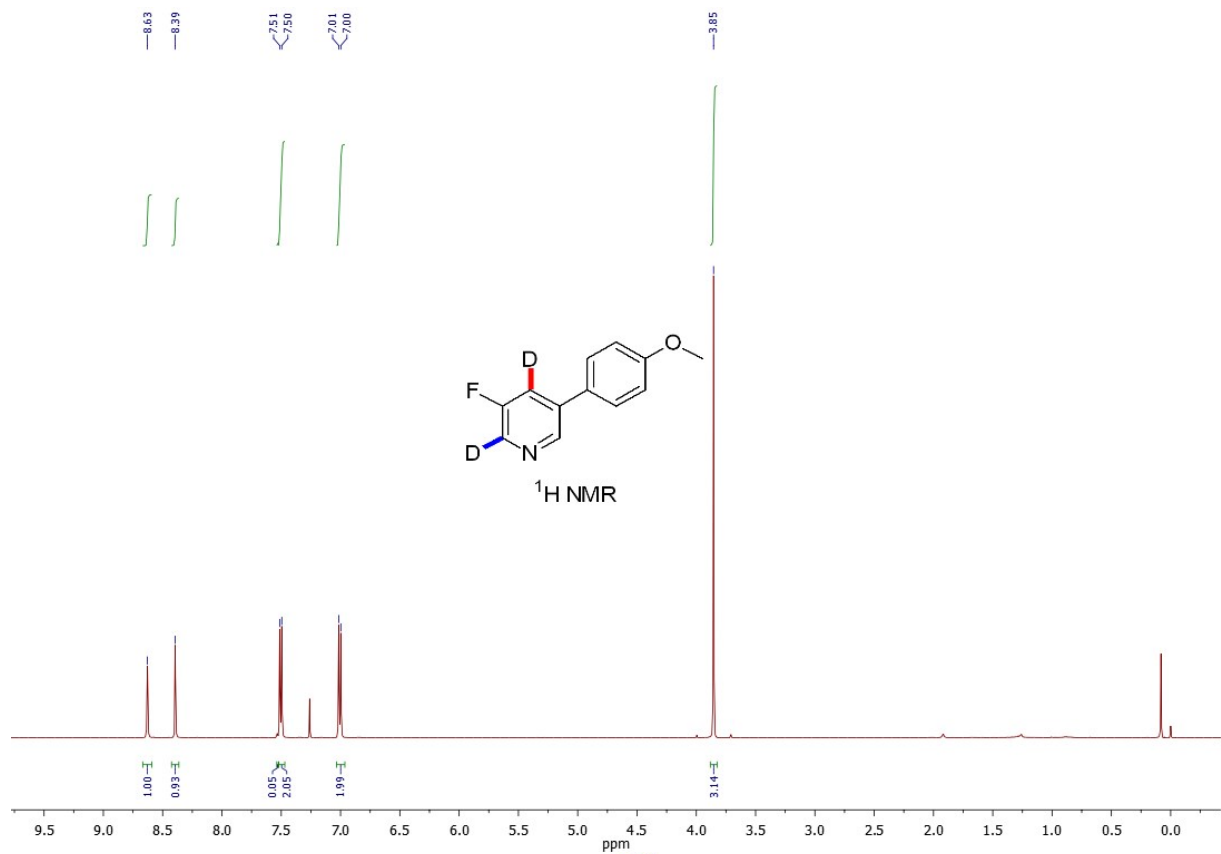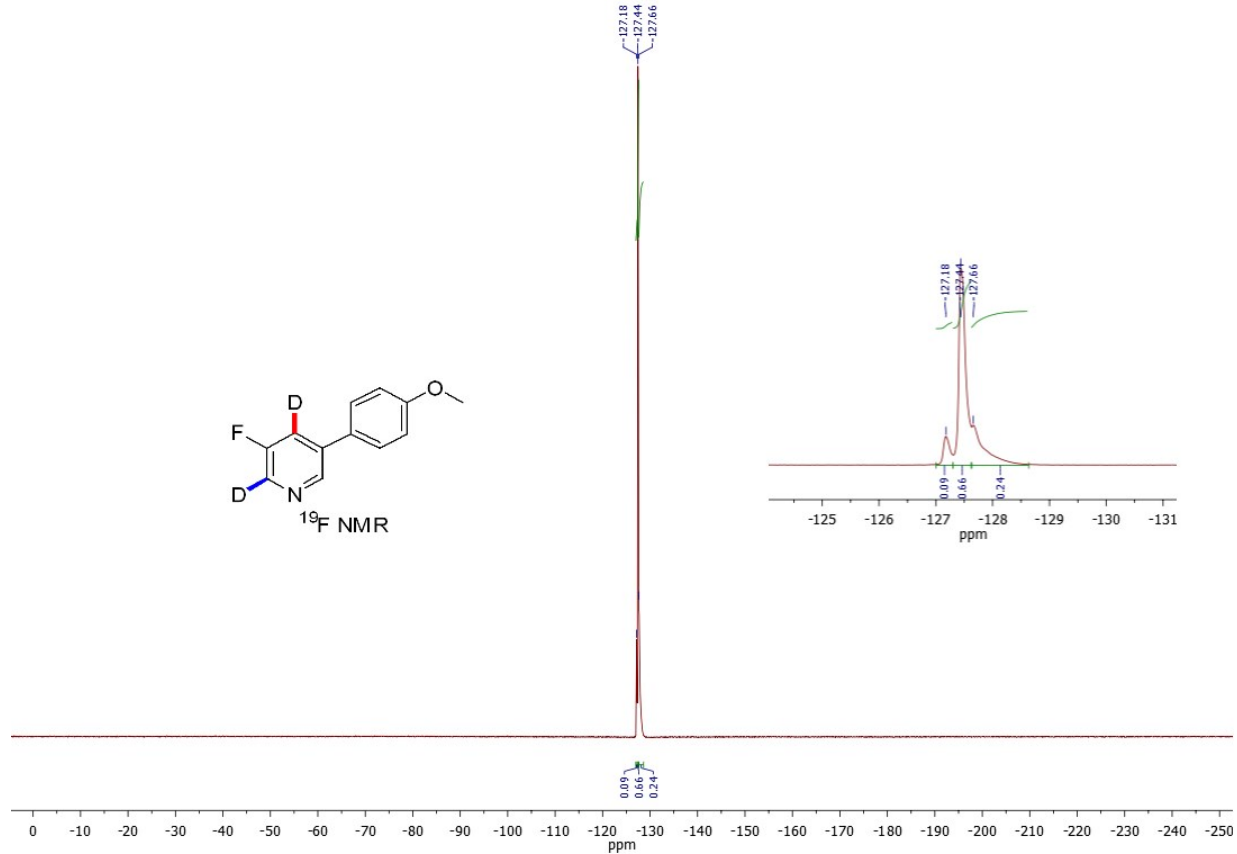

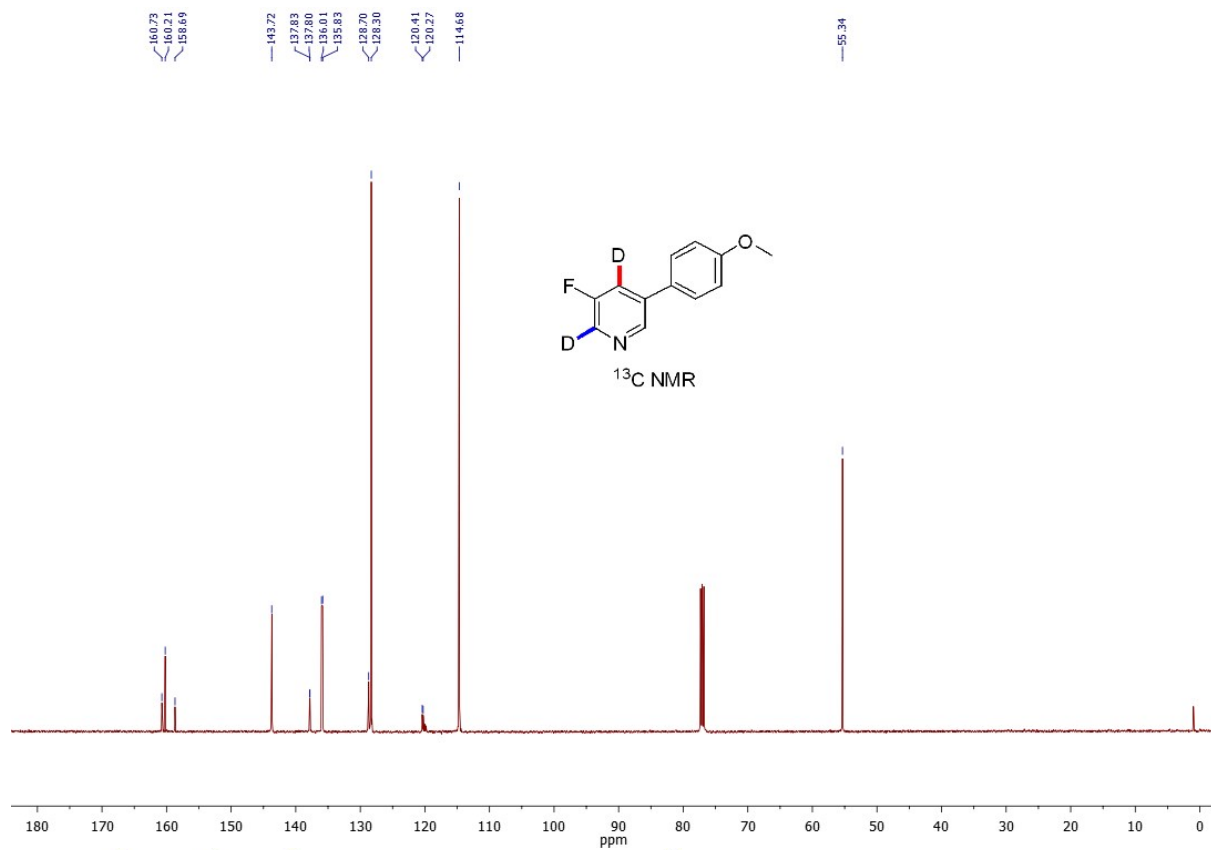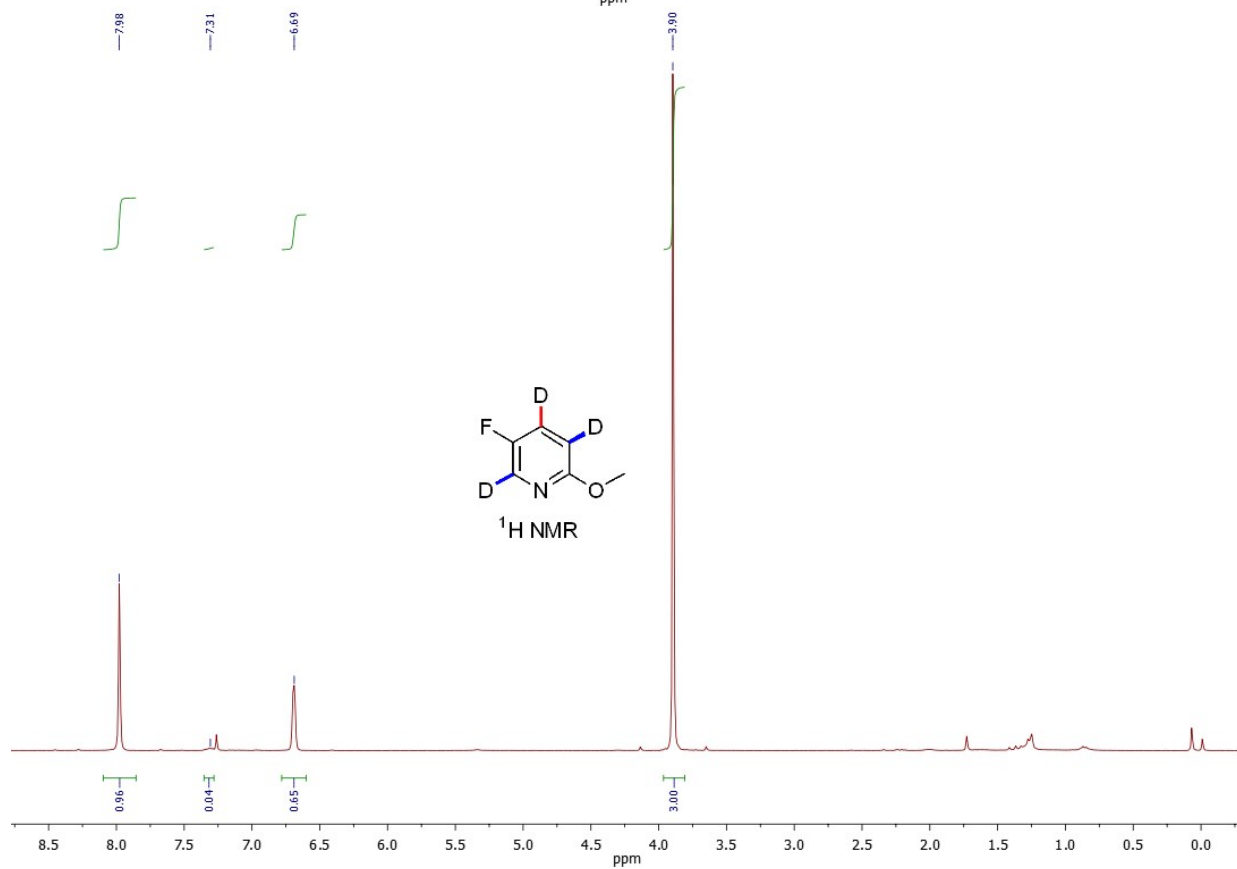

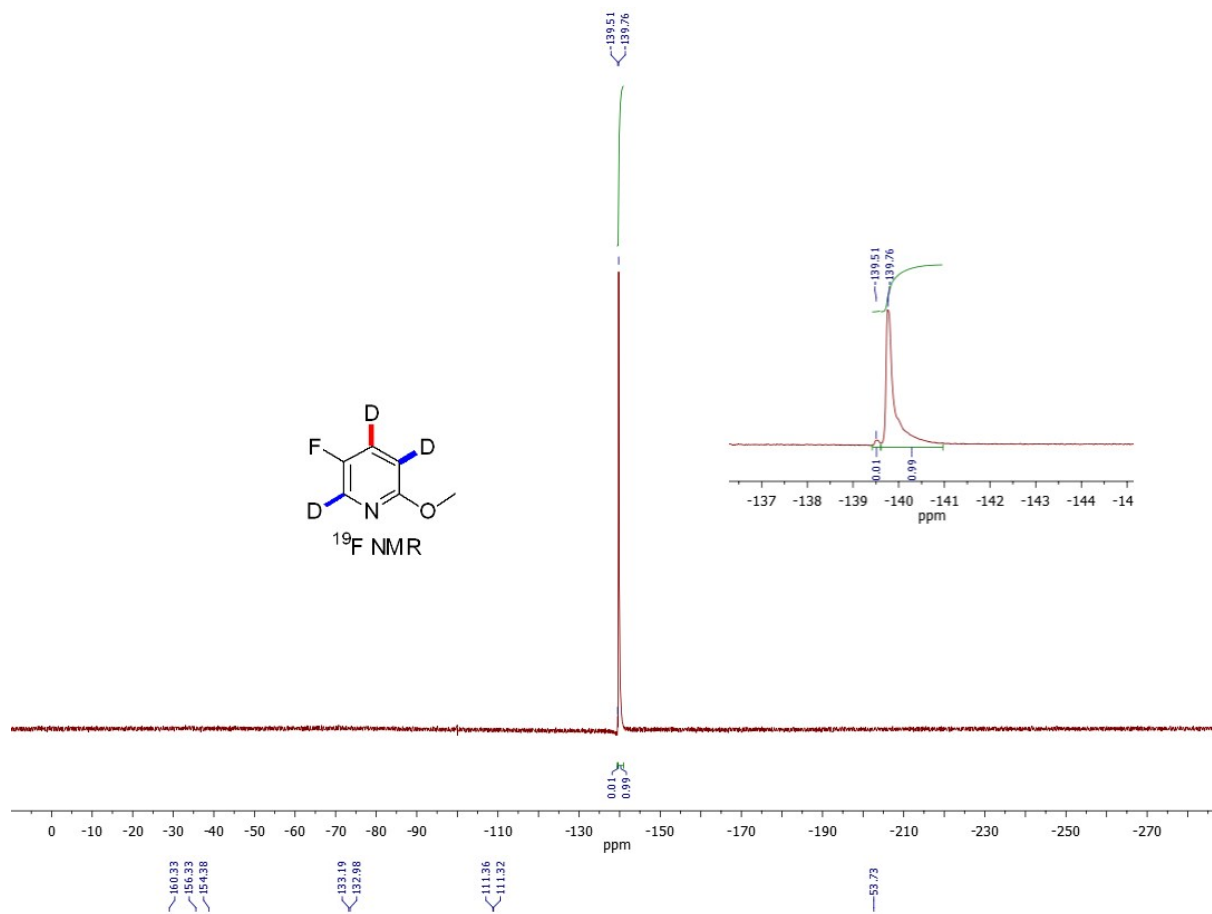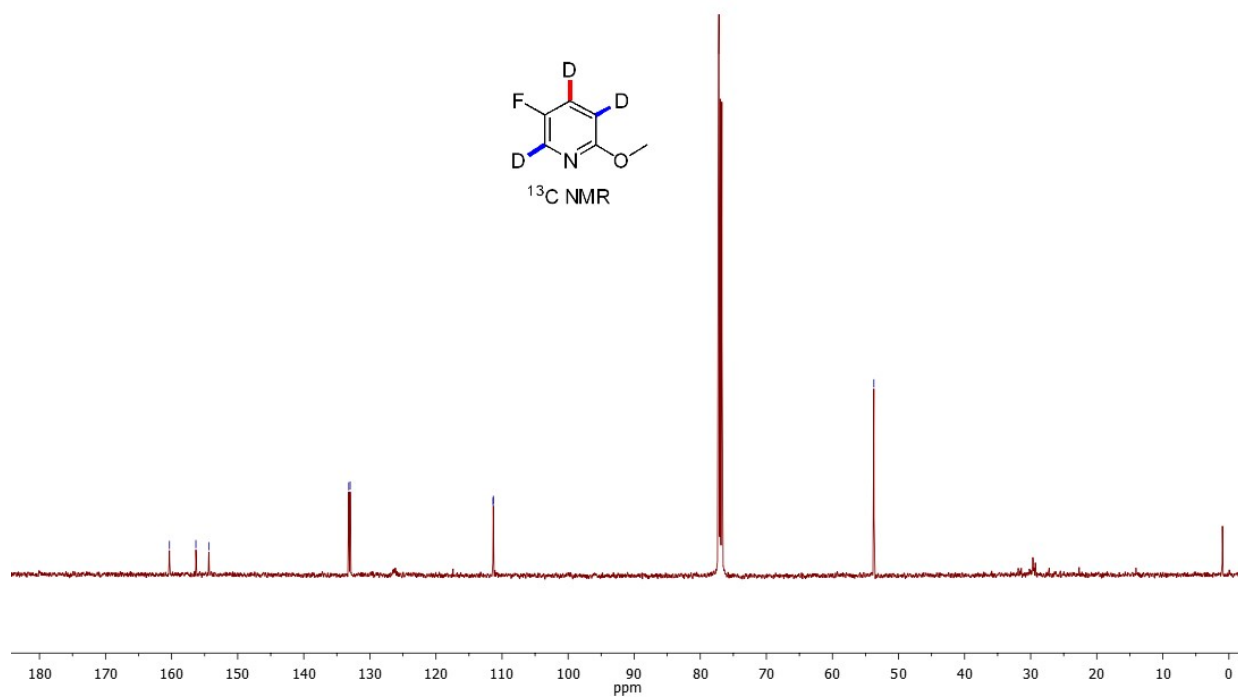

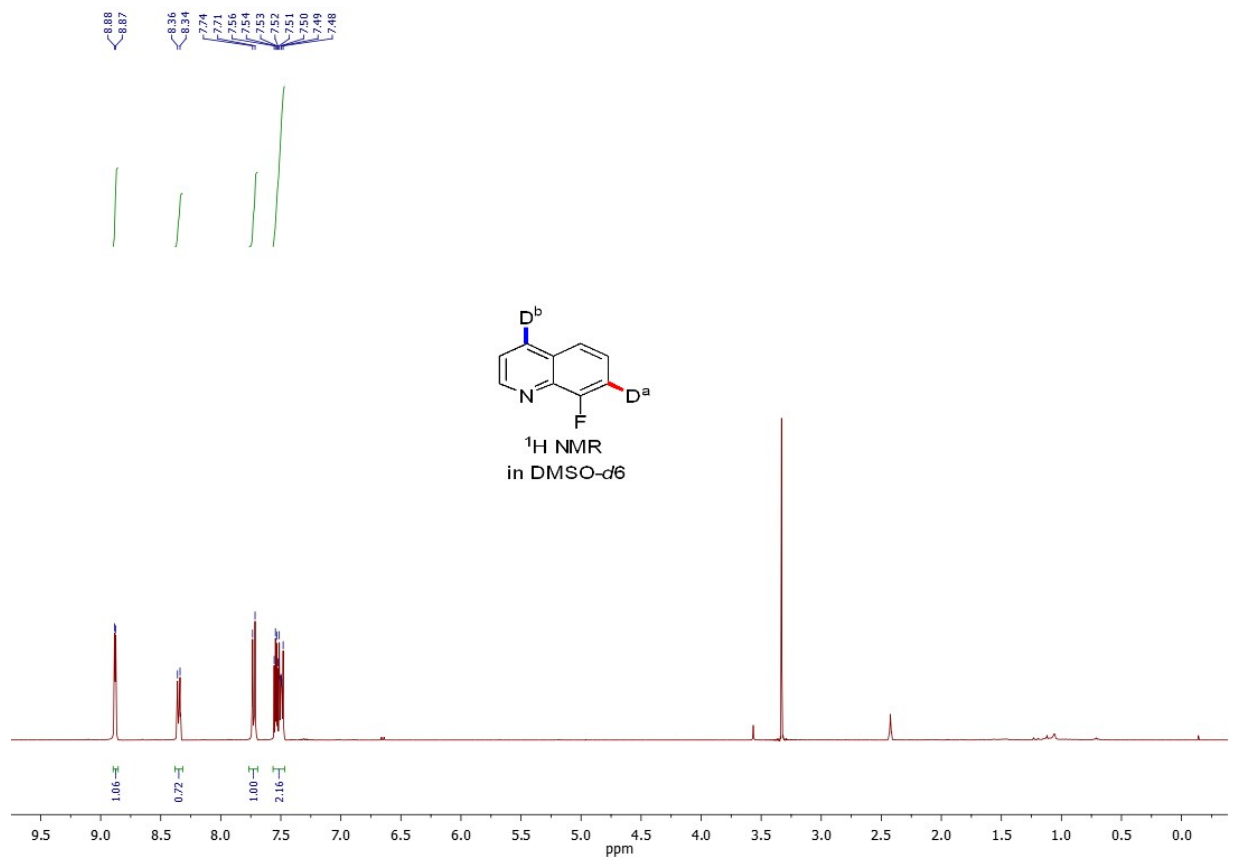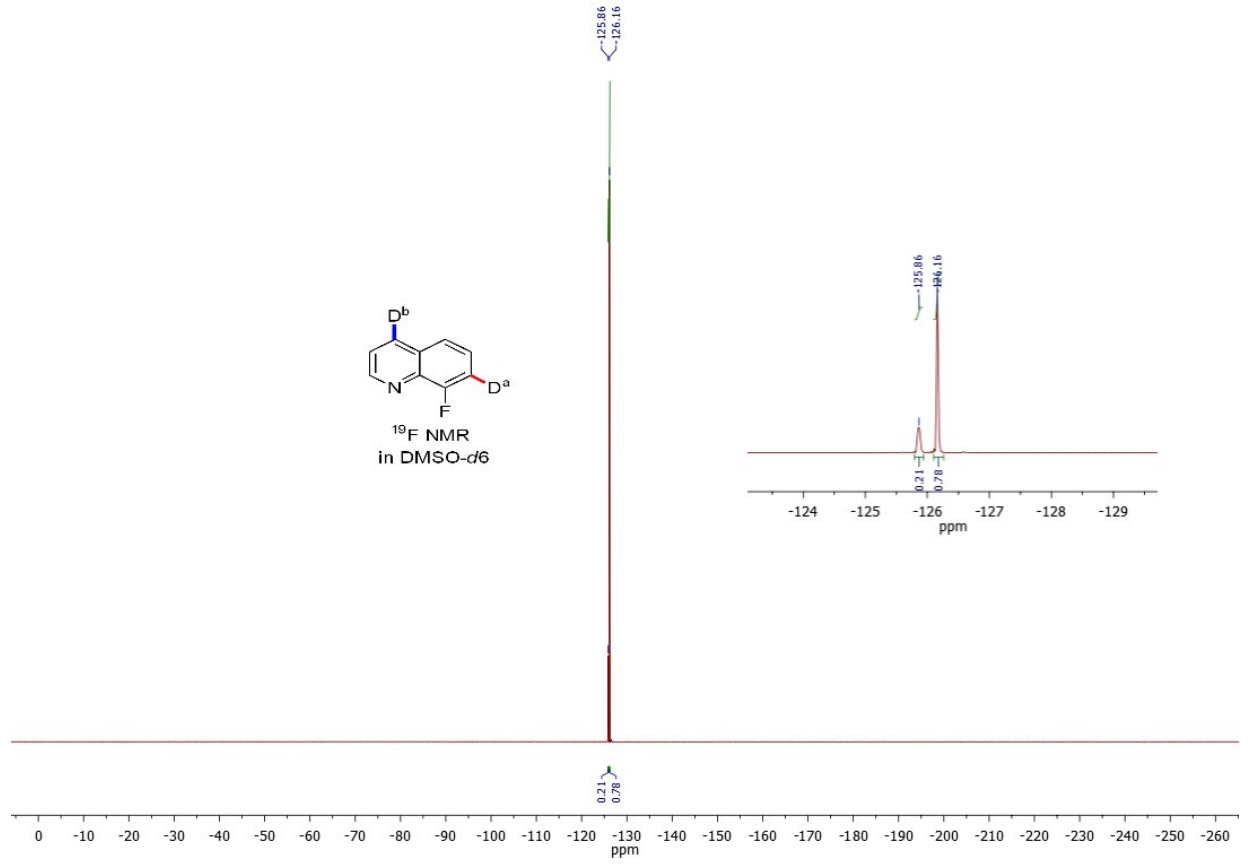

158.84  
155.46  
150.68  
137.63  
135.88  
129.51  
126.31  
123.88  
122.39  
113.62  
113.38

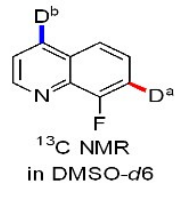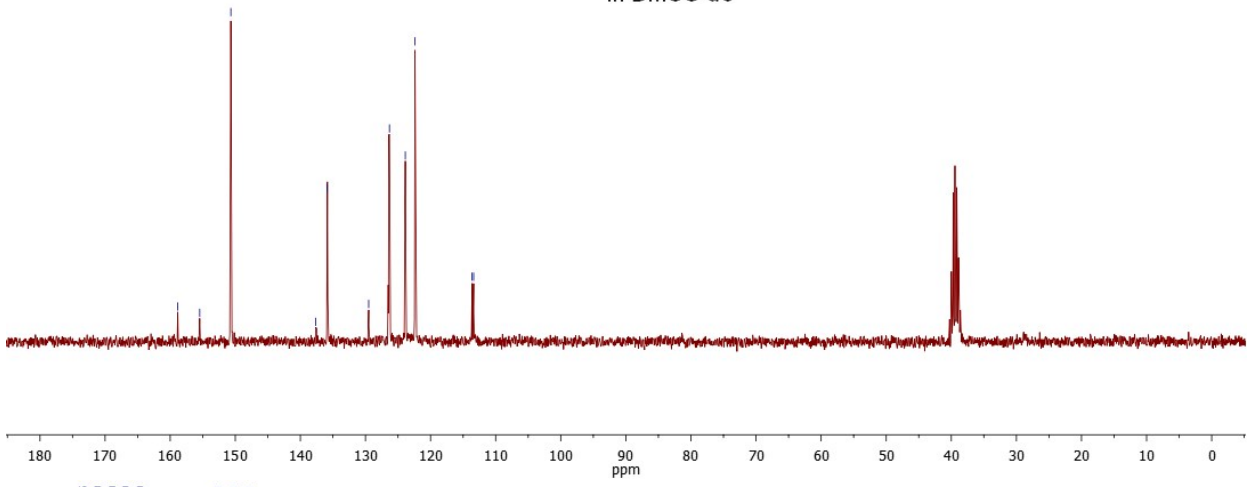

8.65  
8.40  
8.39  
8.39  
7.49  
7.49  
7.48

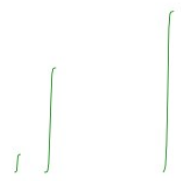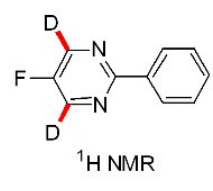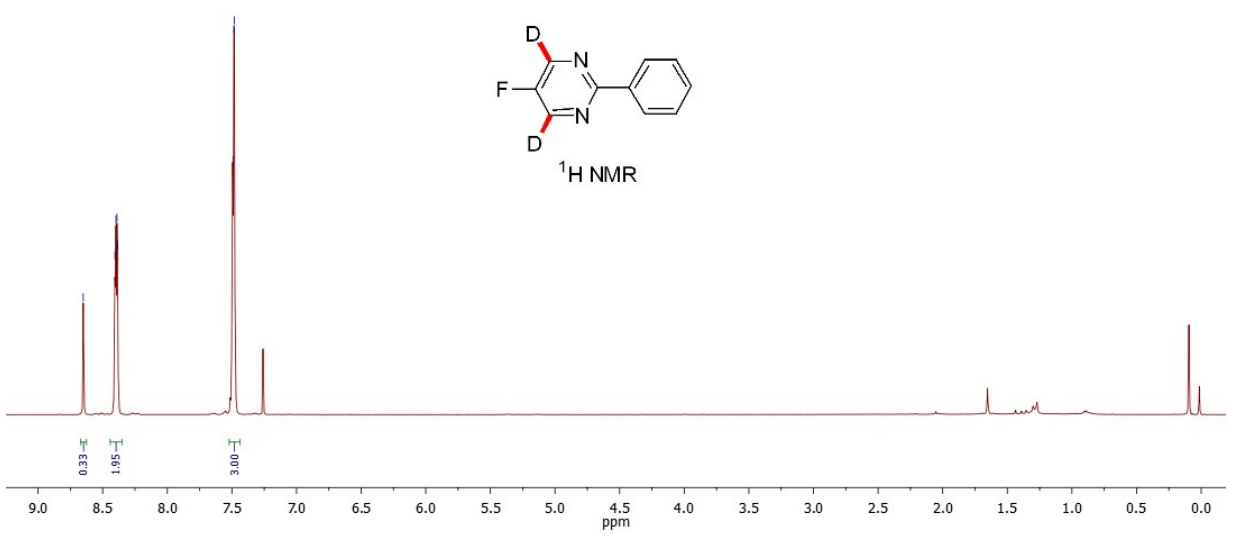

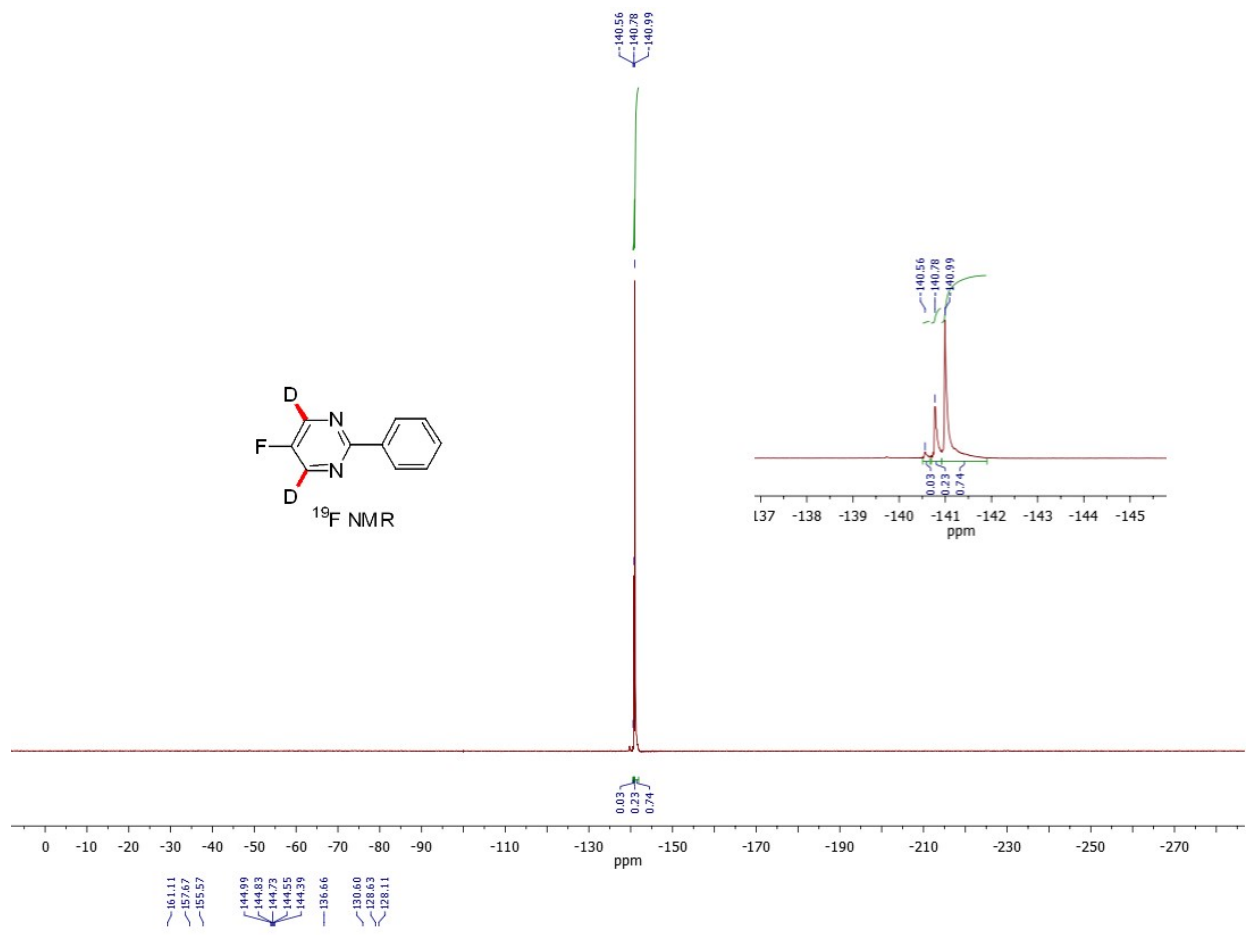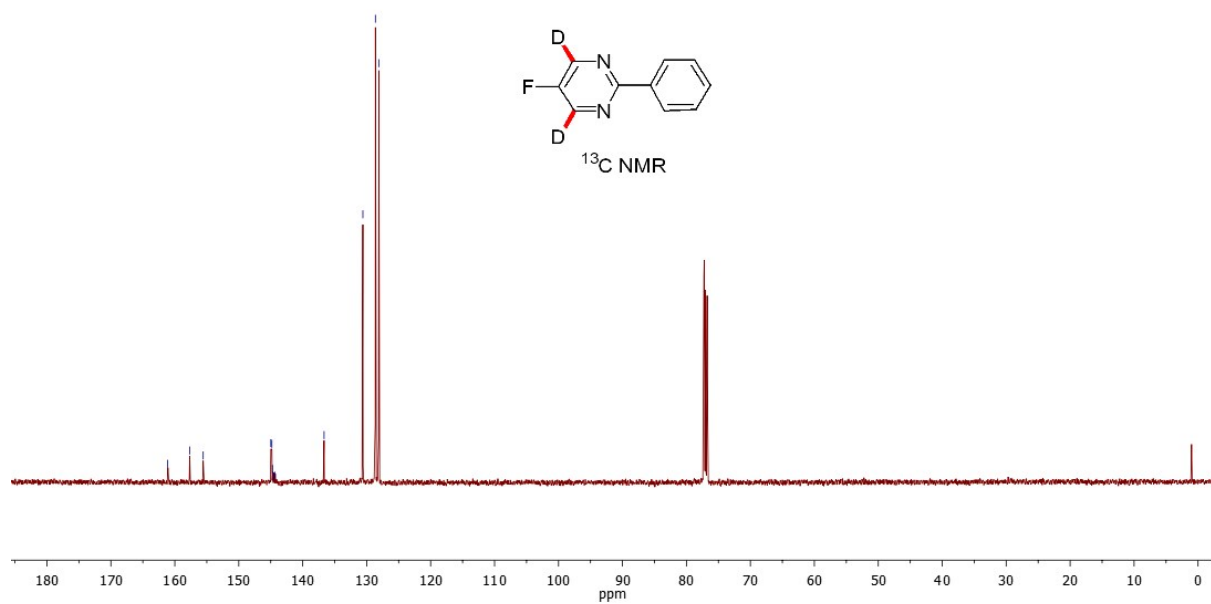

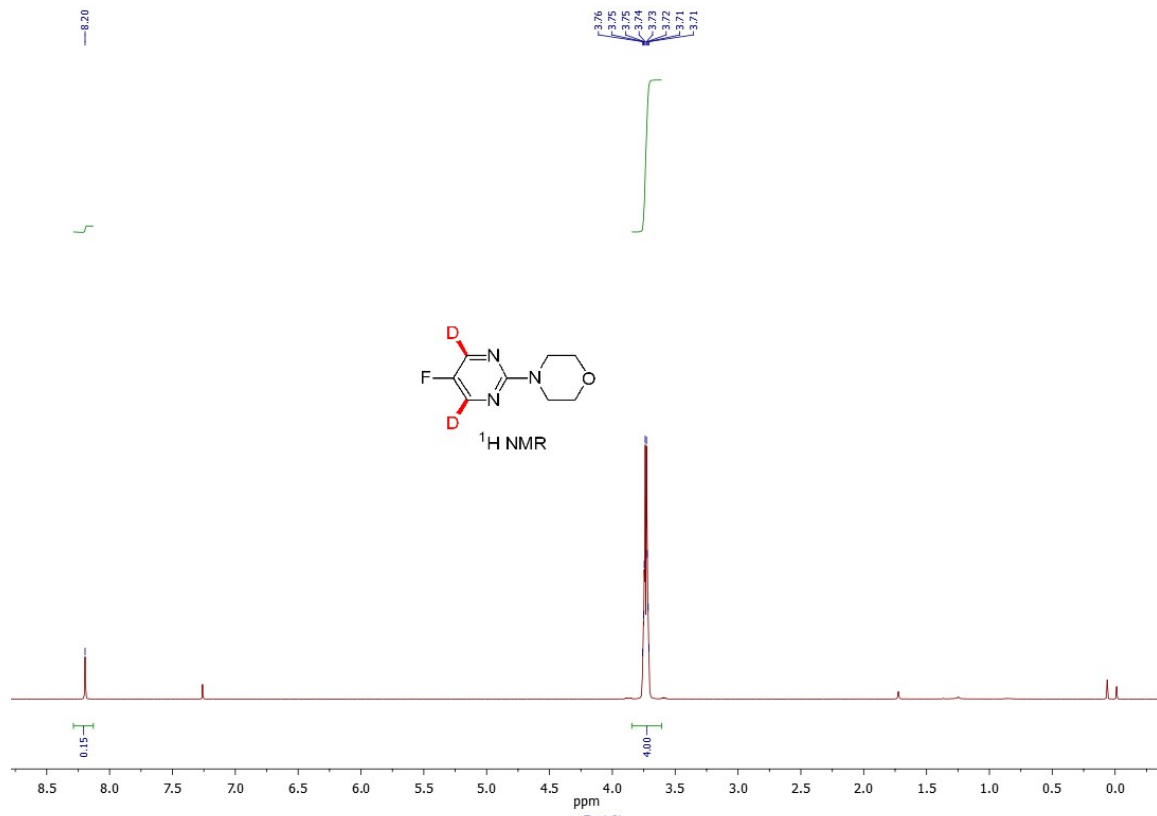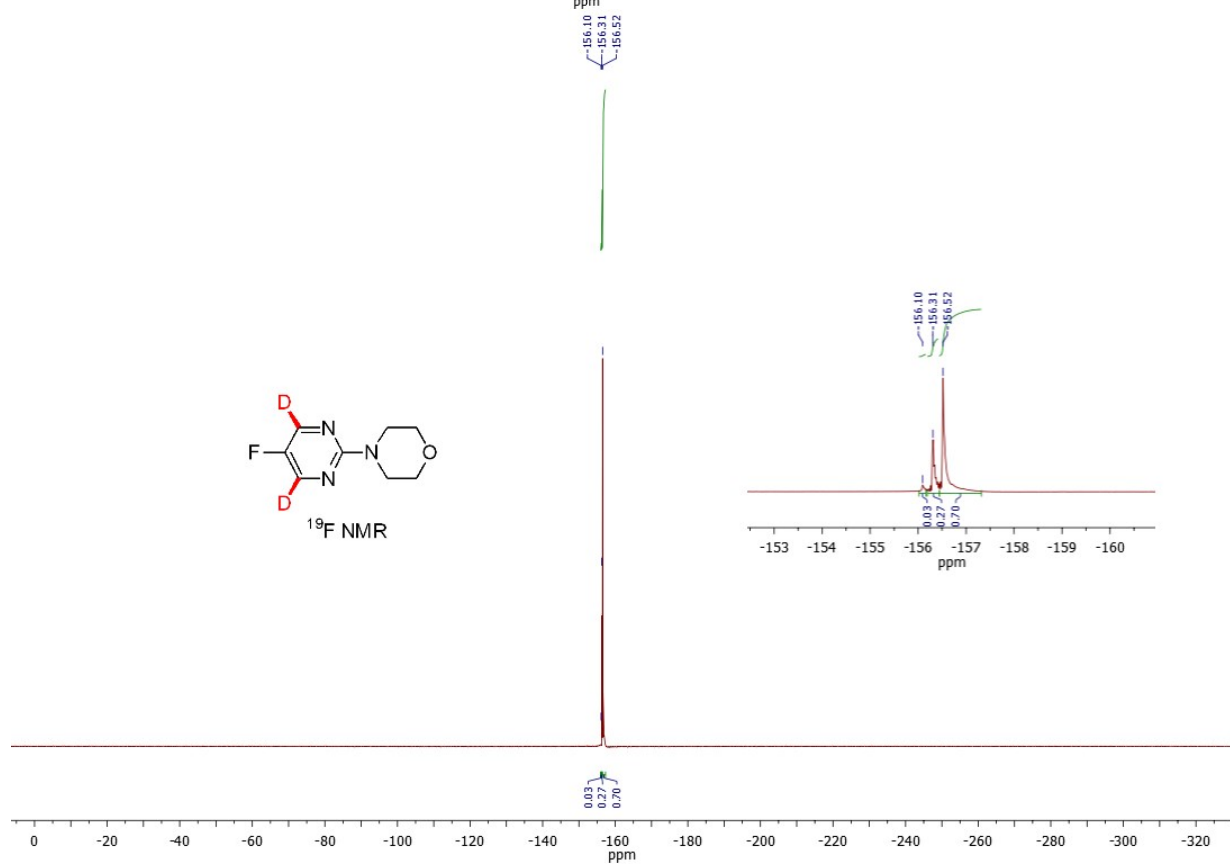

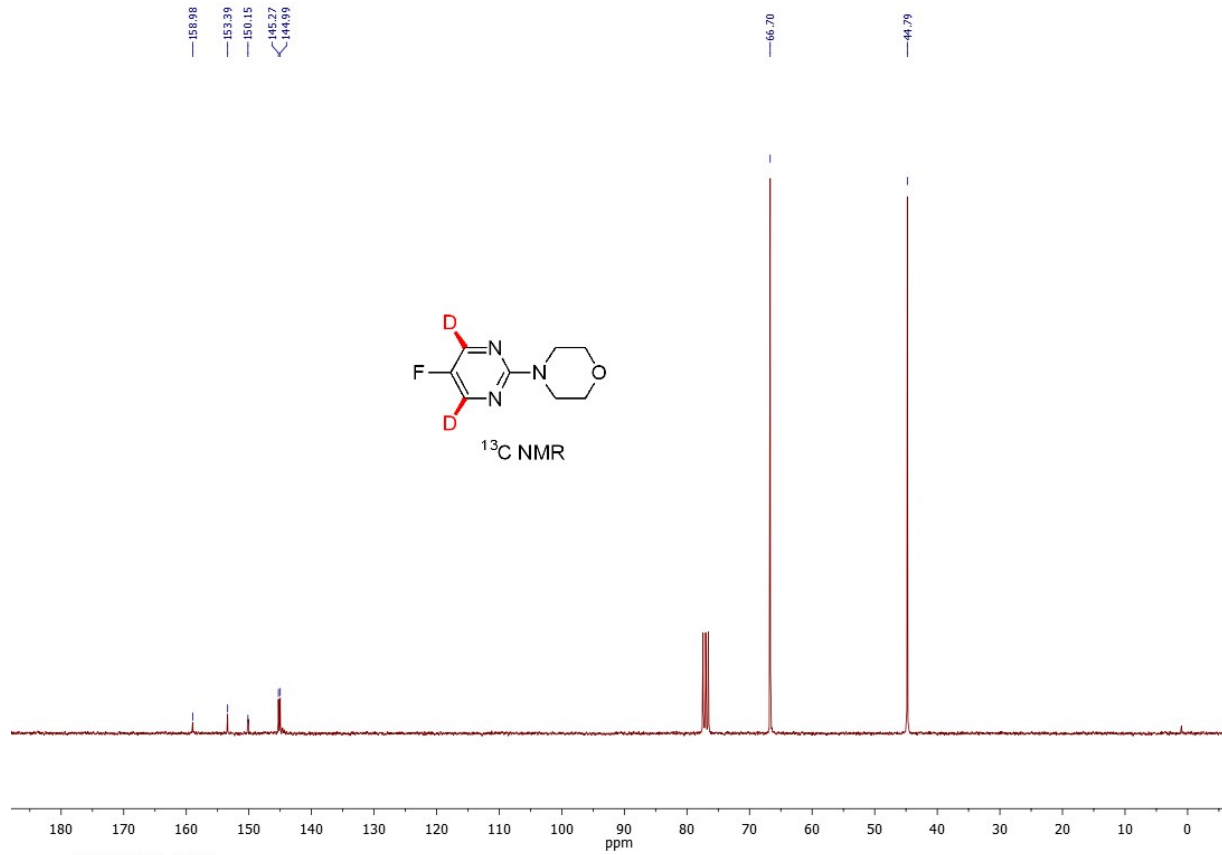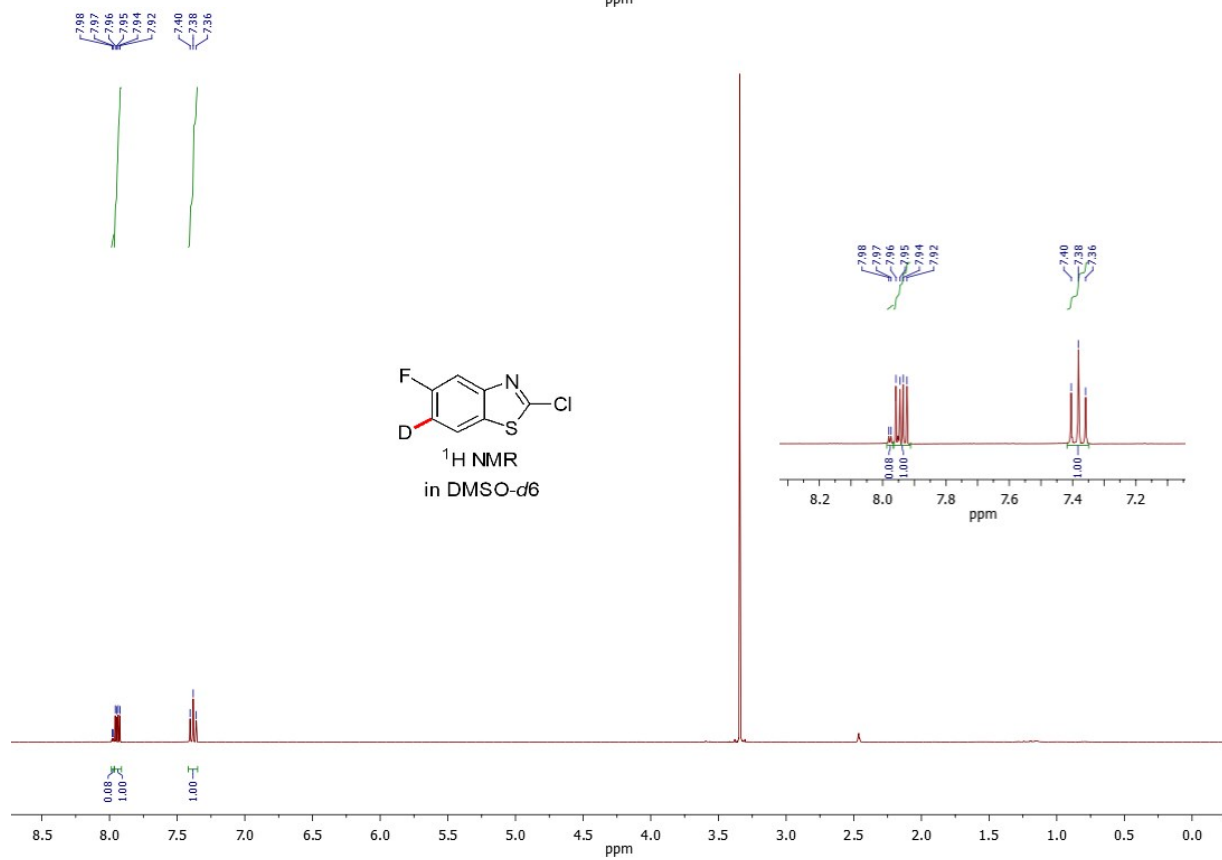



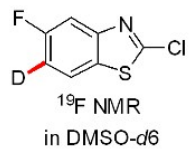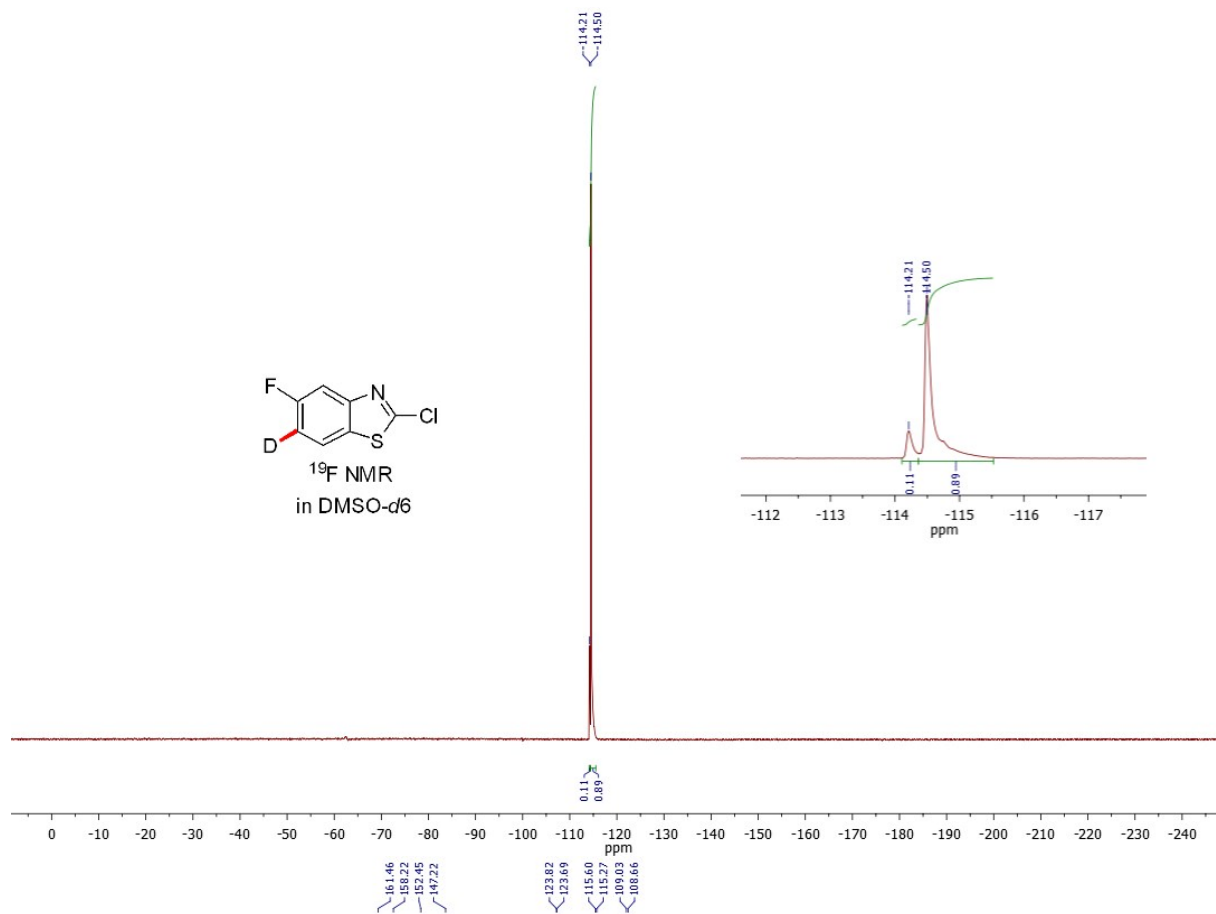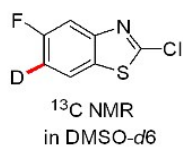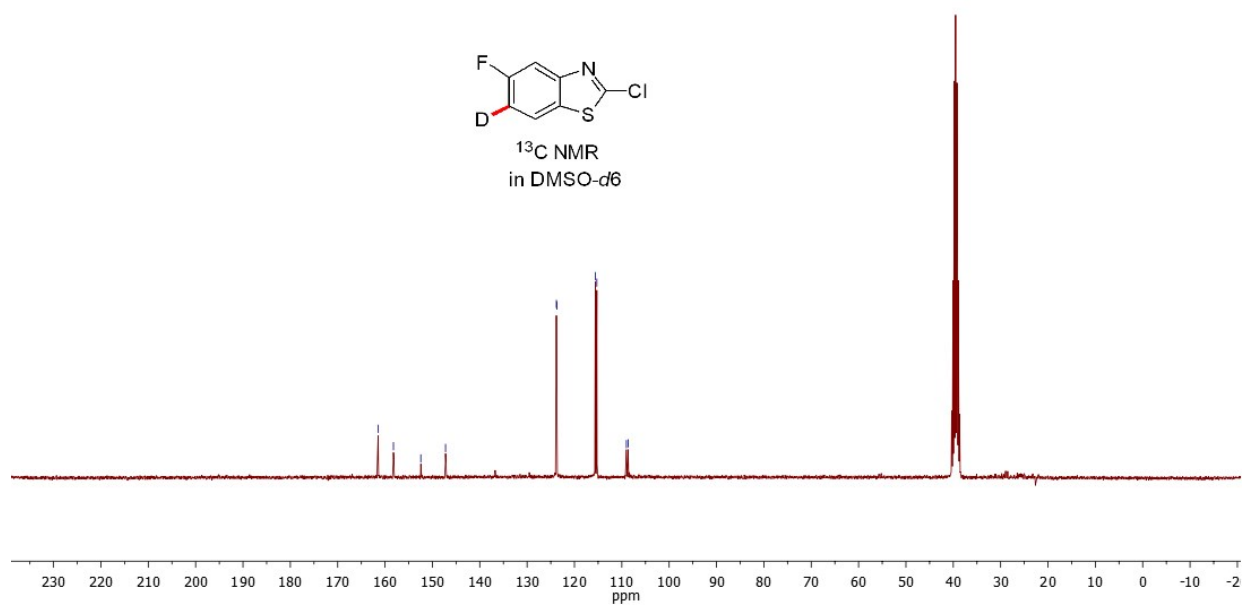

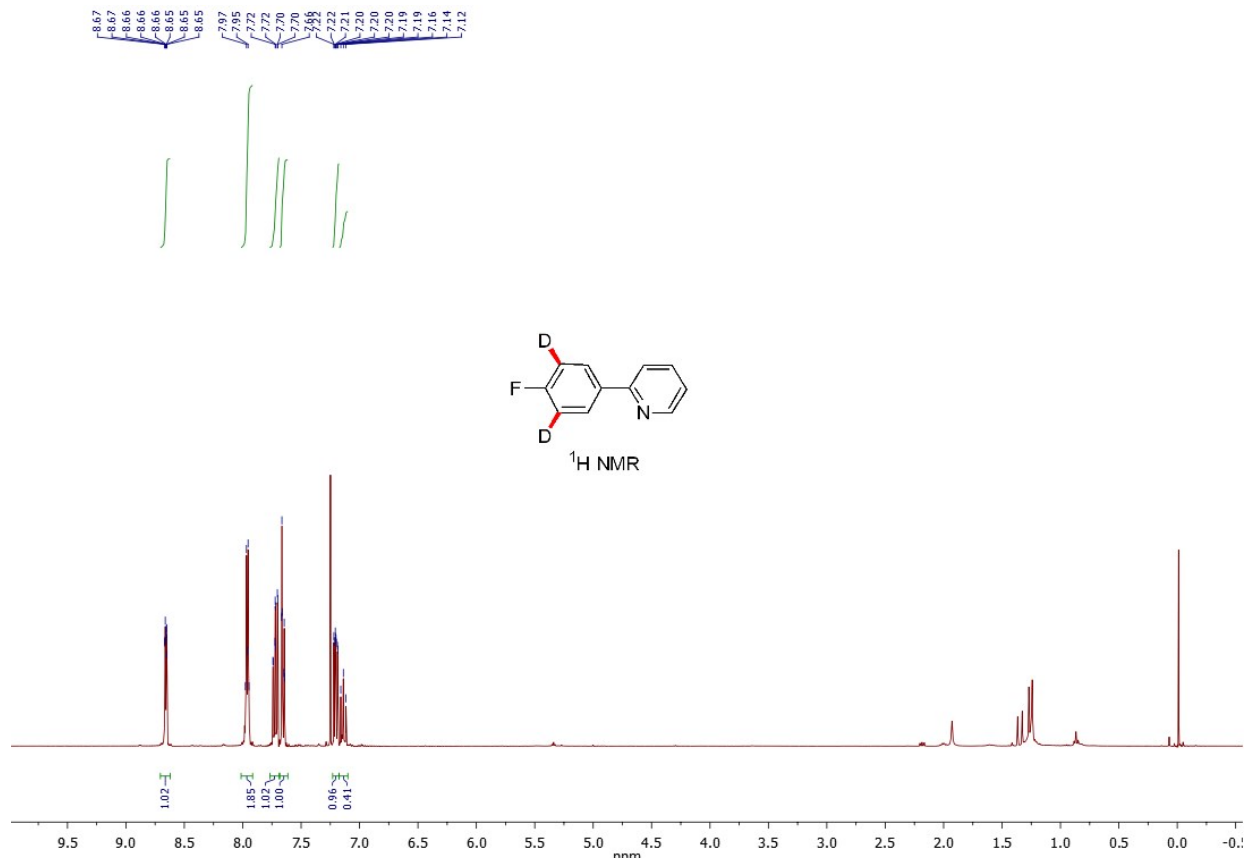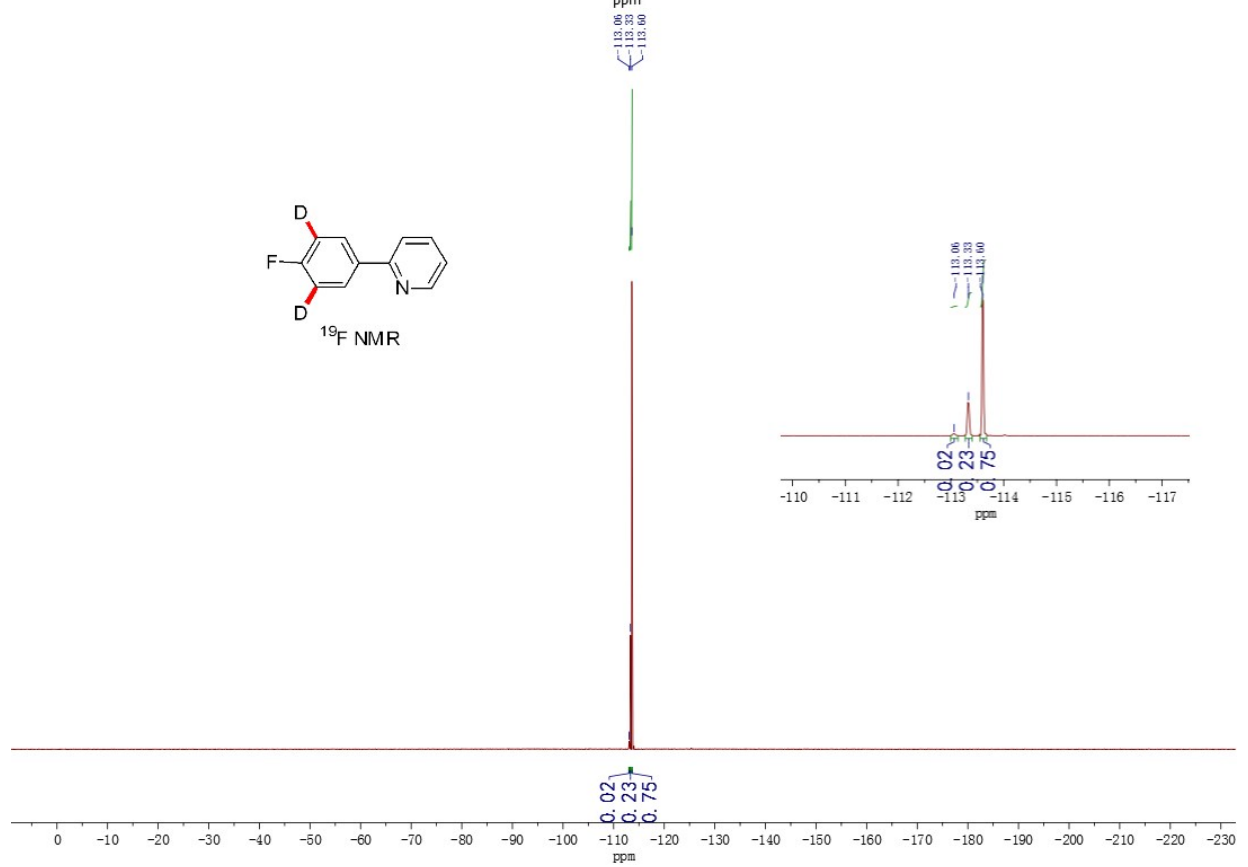

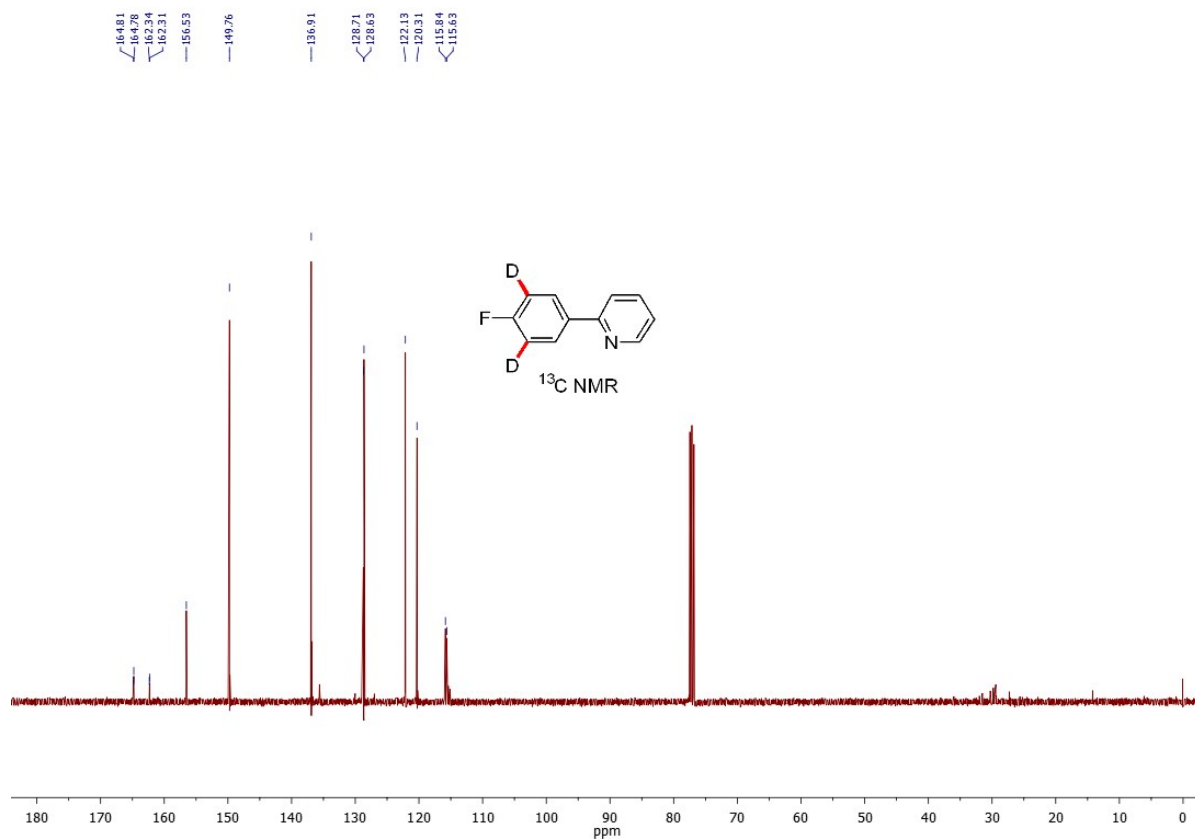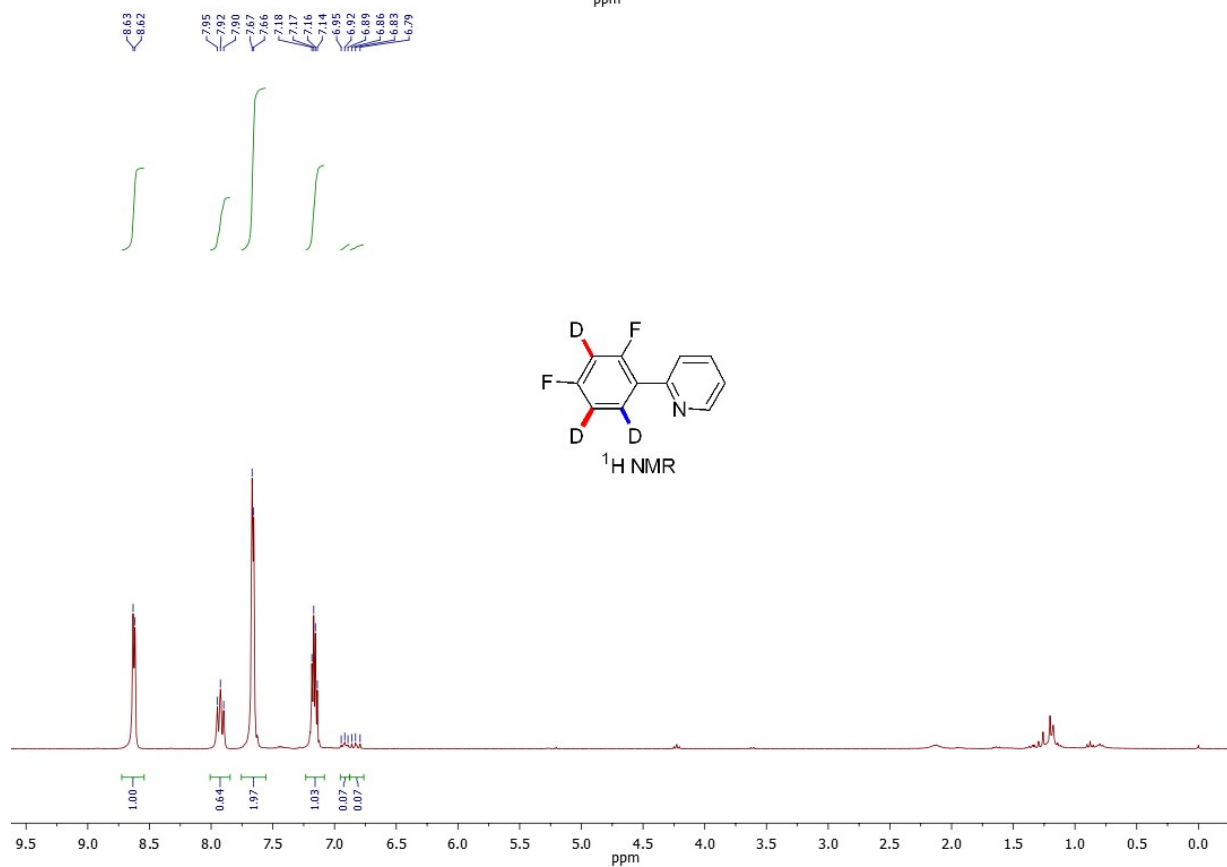

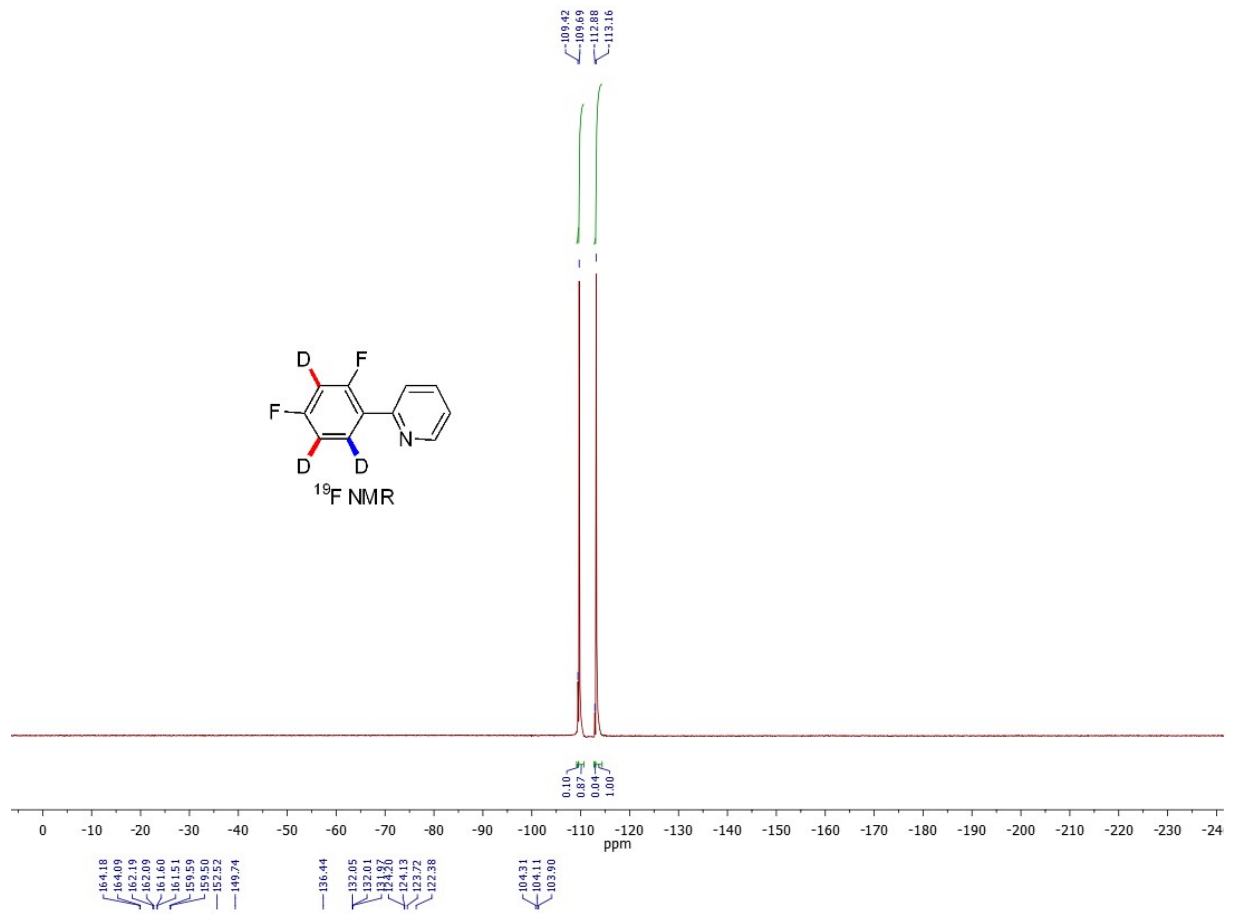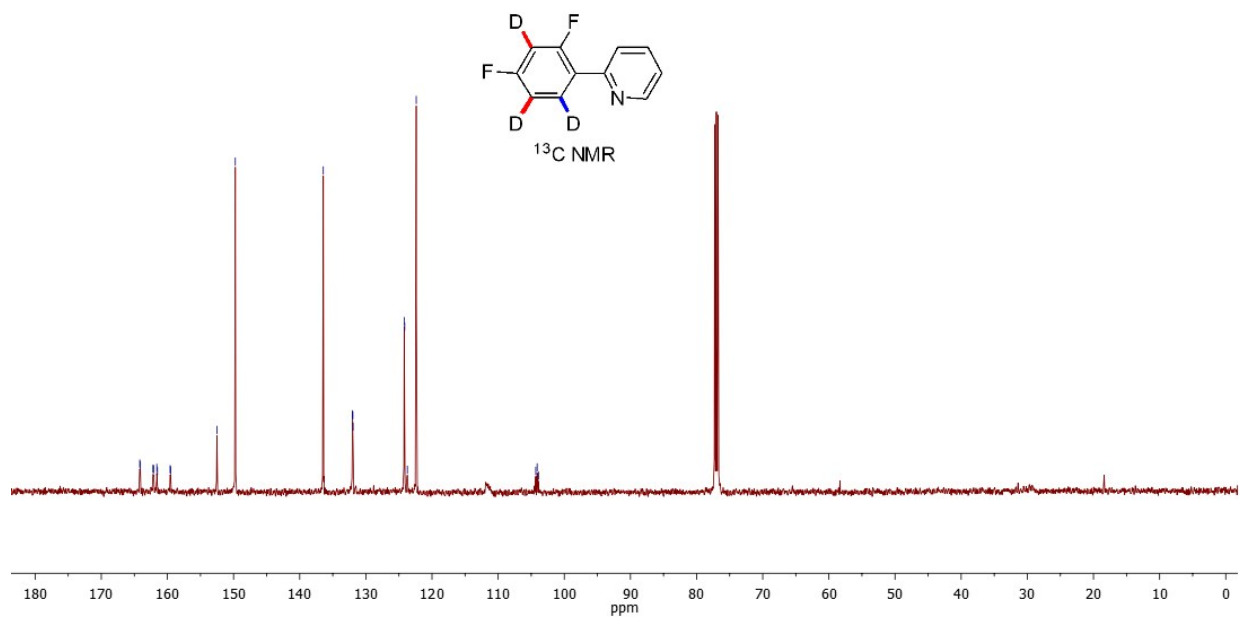

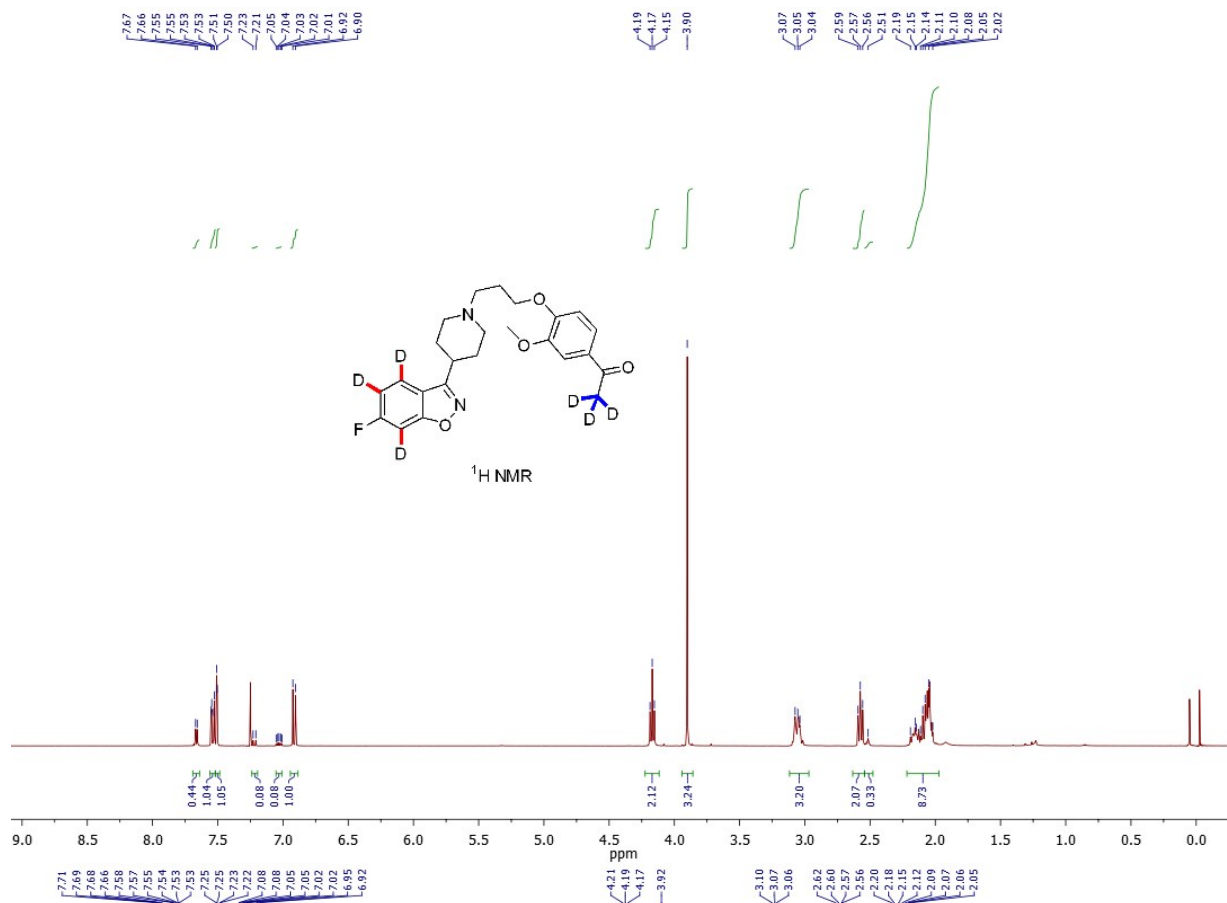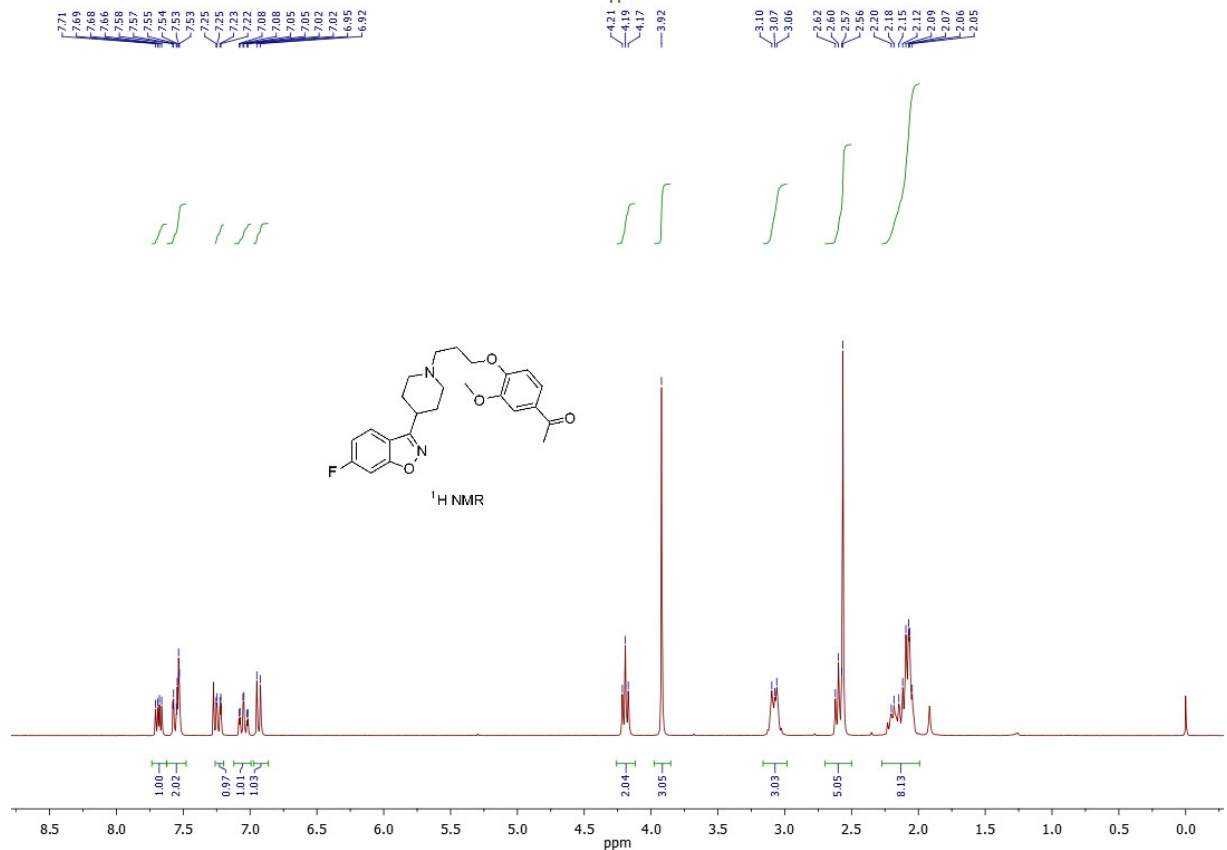

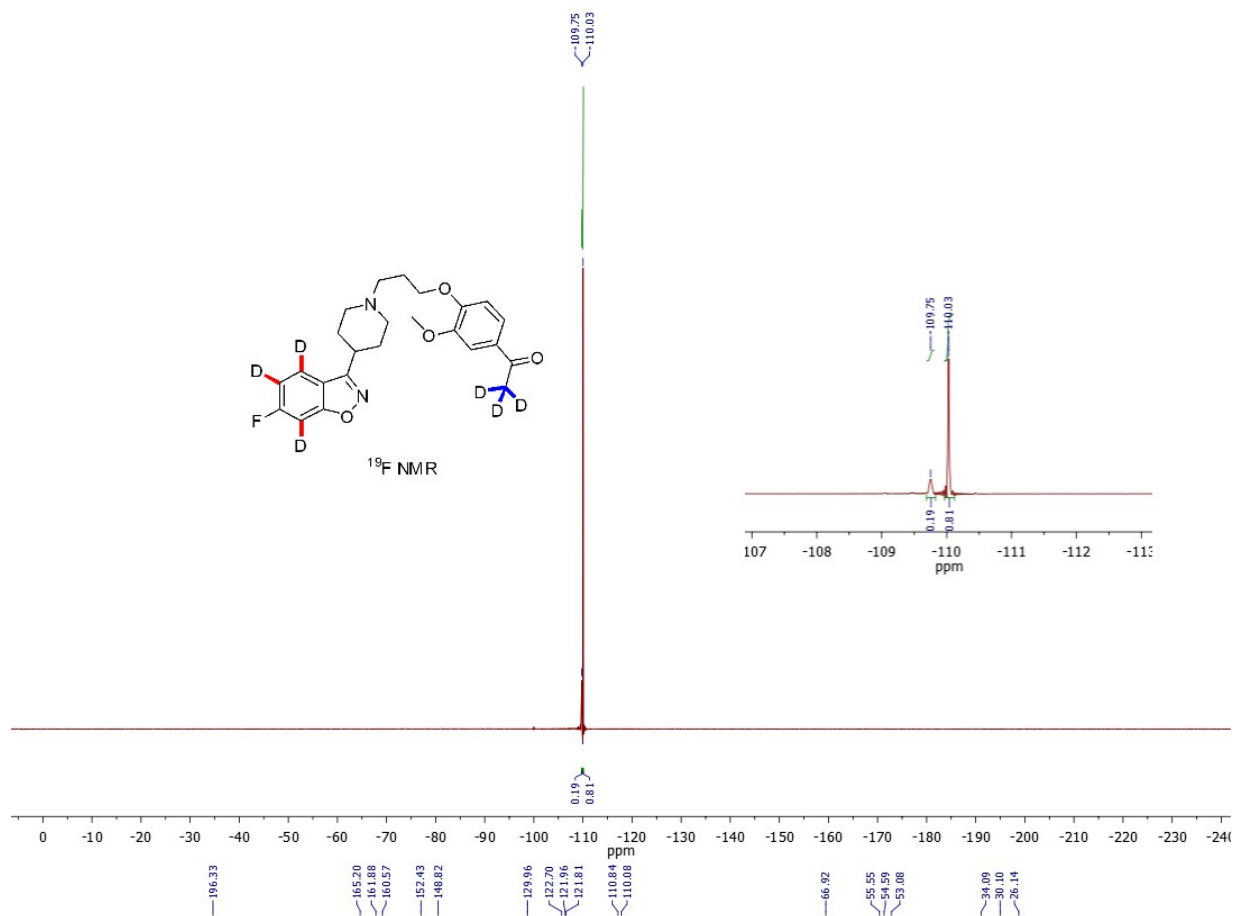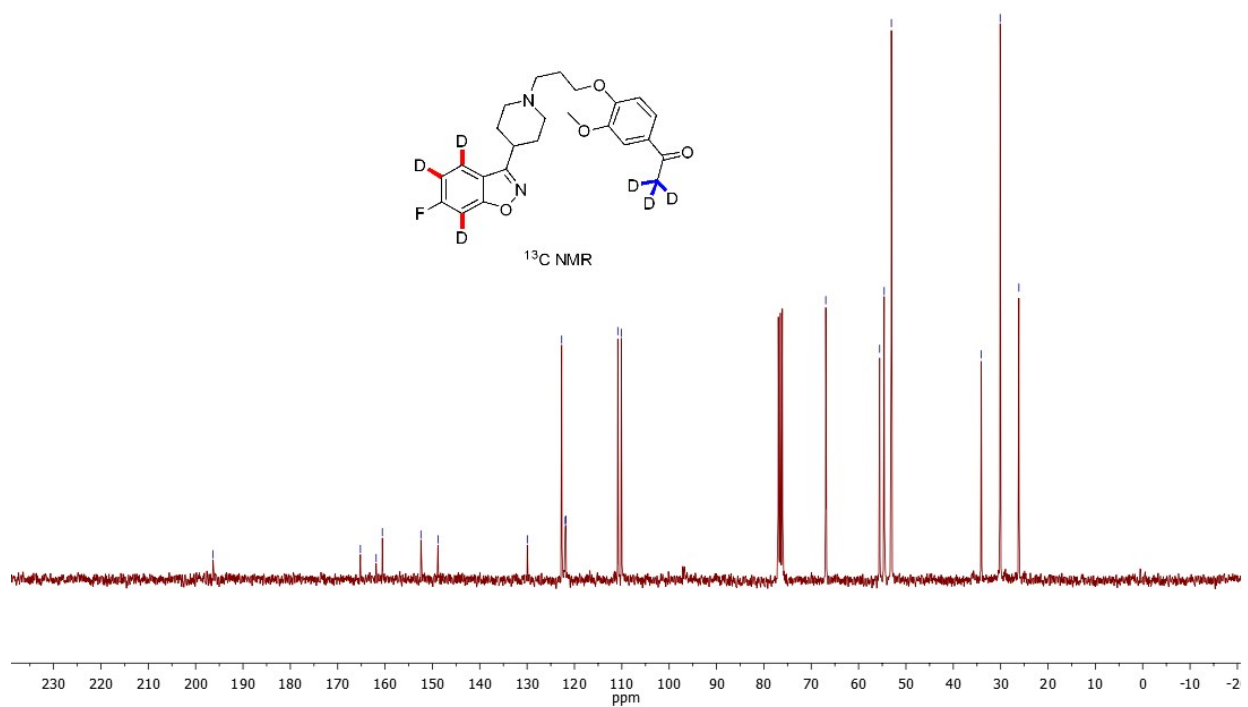

Supplement: d0ob01273d1.pdf [file d0ob01273d1.pdf]
